# Supplementary material for: Handling methane: a Ni(i) F430-like cofactor derived from VB12 is active in methyl-coenzyme M reductase
Source: Royal Society of Chemistry journal article supplement (doi:10.1039/d0cc06591a), 2020-11-23
Supplement: d0cc06591a1.pdf [file d0cc06591a1.pdf]

# Handling Methane: A Ni(I) F<sub>430</sub>-like Cofactor Derived From VB<sub>12</sub> is Active in Methyl-Coenzyme M Reductase

Jue Wu, and Shi-Lu Chen\*

Key Laboratory of Cluster Science of Ministry of Education, School of Chemistry and  
Chemical Engineering, Beijing Institute of Technology, Beijing 100081 (China)

E-mail: shlchen@bit.edu.cn

## Contents

|                                                                                                                        |           |
|------------------------------------------------------------------------------------------------------------------------|-----------|
| <b>Computational Details</b> .....                                                                                     | <b>2</b>  |
| <b>Scheme S1.</b> Catalytic mechanism for the MCR reaction.....                                                        | <b>3</b>  |
| <b>Fig. S1</b> Structures of methyl-Ni(F <sub>430-B12</sub> ) intermediate using a F <sub>430-B12</sub> cofactor ..... | <b>4</b>  |
| <b>Fig. S2</b> Structure of the MCR active site with F <sub>430-B12</sub> predicted by a docking simulation .....      | <b>5</b>  |
| <b>Fig. S3</b> Structure of the MCR active site with the C6 OH of F <sub>430-B12</sub> in the β side .....             | <b>6</b>  |
| <b>Fig. S4</b> Stationary points in methane formation using a F <sub>430-B12</sub> cofactor.....                       | <b>7</b>  |
| <b>Fig. S5</b> Stationary points in the heterodisulfide formation using a F <sub>430-B12</sub> cofactor .....          | <b>8</b>  |
| <b>Fig. S6</b> Potential energy profile for the MCR reaction using a F <sub>430-B12</sub> cofactor .....               | <b>9</b>  |
| <b>Fig. S7</b> Stationary points in methane formation using a F <sub>430-B12</sub> cofactor with F ring.....           | <b>10</b> |
| <b>Fig. S8</b> Stationary points in methane formation using a F <sub>430</sub> cofactor without F ring .....           | <b>11</b> |
| <b>Fig. S9</b> Stationary points in methane formation using a F <sub>430-Hby</sub> cofactor .....                      | <b>12</b> |
| <b>Fig. S10</b> Structure of MCR in the MD simulation with the modified F <sub>430</sub> cofactor .....                | <b>13</b> |
| <b>Fig. S11</b> Structure of MCR in the MD simulation with the modified F <sub>430</sub> cofactor .....                | <b>14</b> |
| <b>Fig. S12</b> Root mean square deviation of the protein backbone .....                                               | <b>15</b> |
| <b>Table S1.</b> Unpaired spin populations of stationary points in the MCR methane formation .....                     | <b>16</b> |
| <b>Cartesian Coordinates of Optimized Structures</b> .....                                                             | <b>17</b> |
| <b>References cited in ESI</b> .....                                                                                   | <b>59</b> |
| <b>The complete references 2, 3, 5, 6, 8, 9, 12, 15, 18, 20-23, and 26-28 in the text</b> .....                        | <b>60</b> |

## Computational Details

### *Density functional calculations*

All calculations were performed using the unrestricted B3LYP hybrid functional<sup>51</sup> with Grimme's empirical D3-dispersion correction<sup>52</sup> included. Geometry optimizations were carried out with the LACVP\*\* basis set as implemented in the Jaguar 8.7 package.<sup>53</sup> Based on the optimized geometries, more accurate energies were obtained using larger basis sets, that is, lacv3p+ for Ni and cc-pvtz(-f)+ for the other atoms. Solvation effects were calculated at the same level of theory as in the optimizations by performing single-point calculations using a dielectric cavity and a dielectric constant of 4. Using Gaussian 09,<sup>54</sup> frequency calculations were performed to obtain zero-point energies (ZPE) and to characterize the nature of stationary points, in which the contributions of frozen atoms in vibrational analysis can be excluded to ensure that the fixation of atoms does not generate extra imaginary frequencies. The general modeling method employed here has been carefully examined and successfully applied to a large number of metalloenzymes,<sup>55</sup> especially the enzymes containing Ni cofactors,<sup>56</sup> such as the methyl-coenzyme M reductase with a F<sub>430</sub> cofactor<sup>57</sup> and the lactate racemase with a Ni pincer cofactor.<sup>58</sup>

### *Molecular Dynamics Simulations*

Molecular dynamics (MD) simulations were performed starting from the crystallographic structure of MCR (PDB entry: 1HBN).<sup>59</sup> The F ring of the F<sub>430</sub> cofactor was modified to its propionyloxy precursor (referred to as F<sub>430-NoF\*</sub>, as shown in Fig. 4). Bonded and atom/atom force fields parameters for methylated His257, Arg271, Glu400, and Cys452 were taken from the Generalized AMBER Force Field (GAFF) using Antechamber module<sup>510</sup> of AmberTools 17. The force field for F<sub>430-NoF\*</sub> and the Gln147 ligand were taken from Metal Centre Parameter Builder (MCPB) using MCPB.py v3.0.<sup>511</sup> The rest of protein were described by the Amber ff14SB force field.<sup>512</sup> The MCR protein was inserted into a box of TIP3P water<sup>513</sup> molecules based on a minimum clearance of 12 Å between solute atoms and the sides of the box. To neutralize the system, 10 sodium ions were added.

The PMEMD.CUDA<sup>514</sup> module of AMBER 16<sup>515</sup> was used to run the MD simulations. Four minimization steps, composed of 10000 cycles of steepest descent and 10000 cycles of conjugate gradient, were performed as follows: (1) in the first step, all heavy atoms of the protein (i.e., non-hydrogen atoms) were restrained with 500 kcal/mol·Å<sup>2</sup> harmonic force constant; (2) in the following three steps, only the backbone atoms of the protein were restrained, with 500, 125, and 25 kcal/mol·Å<sup>2</sup> force constant, respectively. Then, the fifth minimization step, composed of 2000 cycles of steepest descent and 8000 cycles of conjugate gradient, was performed without any constraints.

The system was gradually heated up from 0 to 298 K in 50 K increments by performing seven 100-ps consecutive simulations in the NVT ensemble. Subsequently, the 20-ps simulation employing 1 bar pressure in the NPT ensemble was carried out. In these simulations, heavy atoms were restrained using harmonic position restraints with a force constant of 10 kcal/mol·Å<sup>2</sup>. The system was then evolved without constraints for 100 ns at 298 K and the temperature was then increased in step of about 5 K, until 333 K. These additional simulations were run for 25 ns except for 100 ns at the 333 K.

The periodic boundary conditions were applied in all equilibration molecular simulations. The particle mesh Ewald (PME) algorithm<sup>516</sup> was used for the treatment of the long-range interactions beyond a 10 Å cutoff. The SHAKE algorithm<sup>517</sup> was used to constrain the bonds involving the hydrogen atoms. During this procedure, the Langevin thermostat<sup>518</sup> with collision frequency of 2 ps<sup>-1</sup> and the Berendsen barostat<sup>519</sup> with a pressure relaxation time of 2 ps were used to maintain the temperature and density of the system. The time step in all simulations is 2 fs. The root mean square displacement (RMSD) of the enzyme backbone relative to the starting crystal structure (Fig. S12 in the ESI) was calculated using the cpptraj<sup>520</sup> in the AmberTools 17 package.

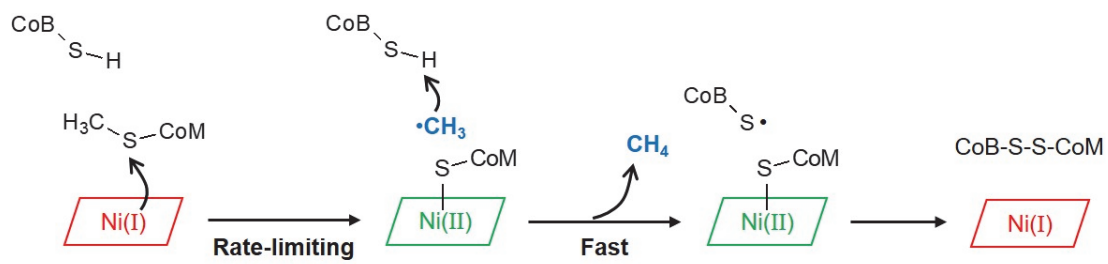

**Scheme S1.** Catalytic mechanism for the MCR reaction.

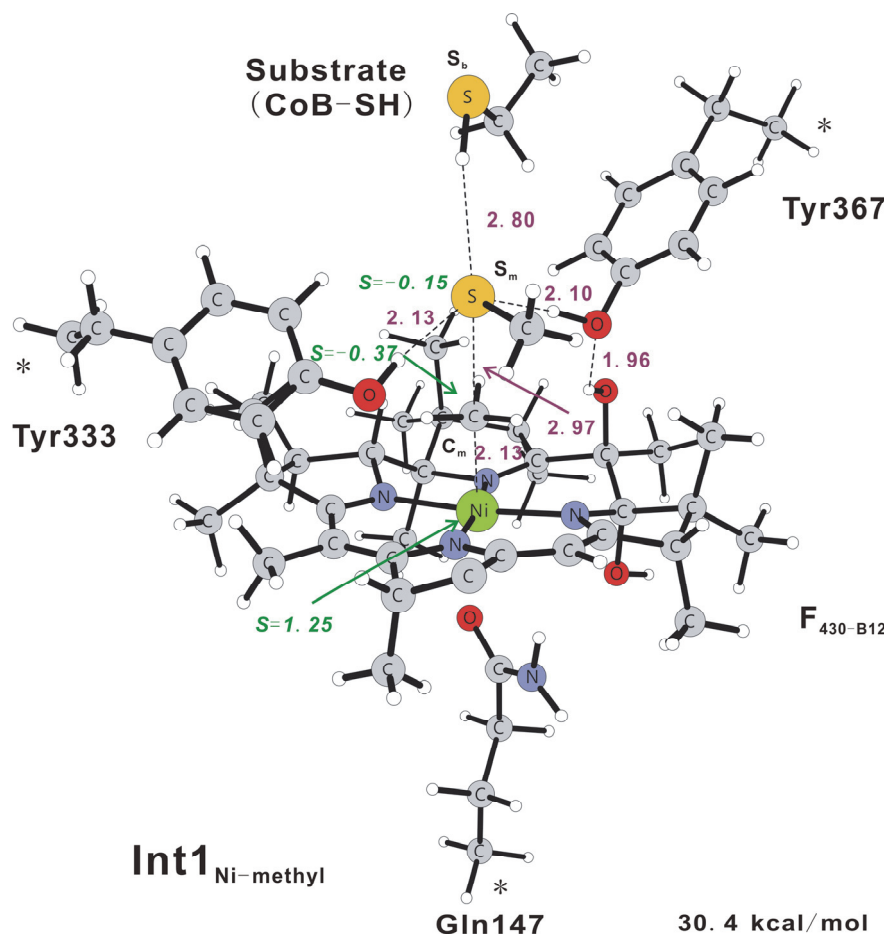

**Fig. S1** Optimized structures of a methyl-Ni(F<sub>430-B12</sub>) intermediate (**Int1**<sub>Ni-methyl</sub>) using the F<sub>430-B12</sub> cofactor. Asterisks indicate atoms that are fixed to their X-ray positions. All distances are given in angstrom (Å). The unpaired spin population is indicated by "S". S<sub>m</sub>=The sulphur of CH<sub>3</sub>-SCoM; C<sub>m</sub>=The methyl carbon of CH<sub>3</sub>-SCoM; S<sub>b</sub>=The sulphur of CoB-SH. For clarity, several atoms in the porphyrinoid are omitted. Its energy relative to the enzyme-substrate complex of Fig. 2 is calculated to be 30.4 kcal/mol.

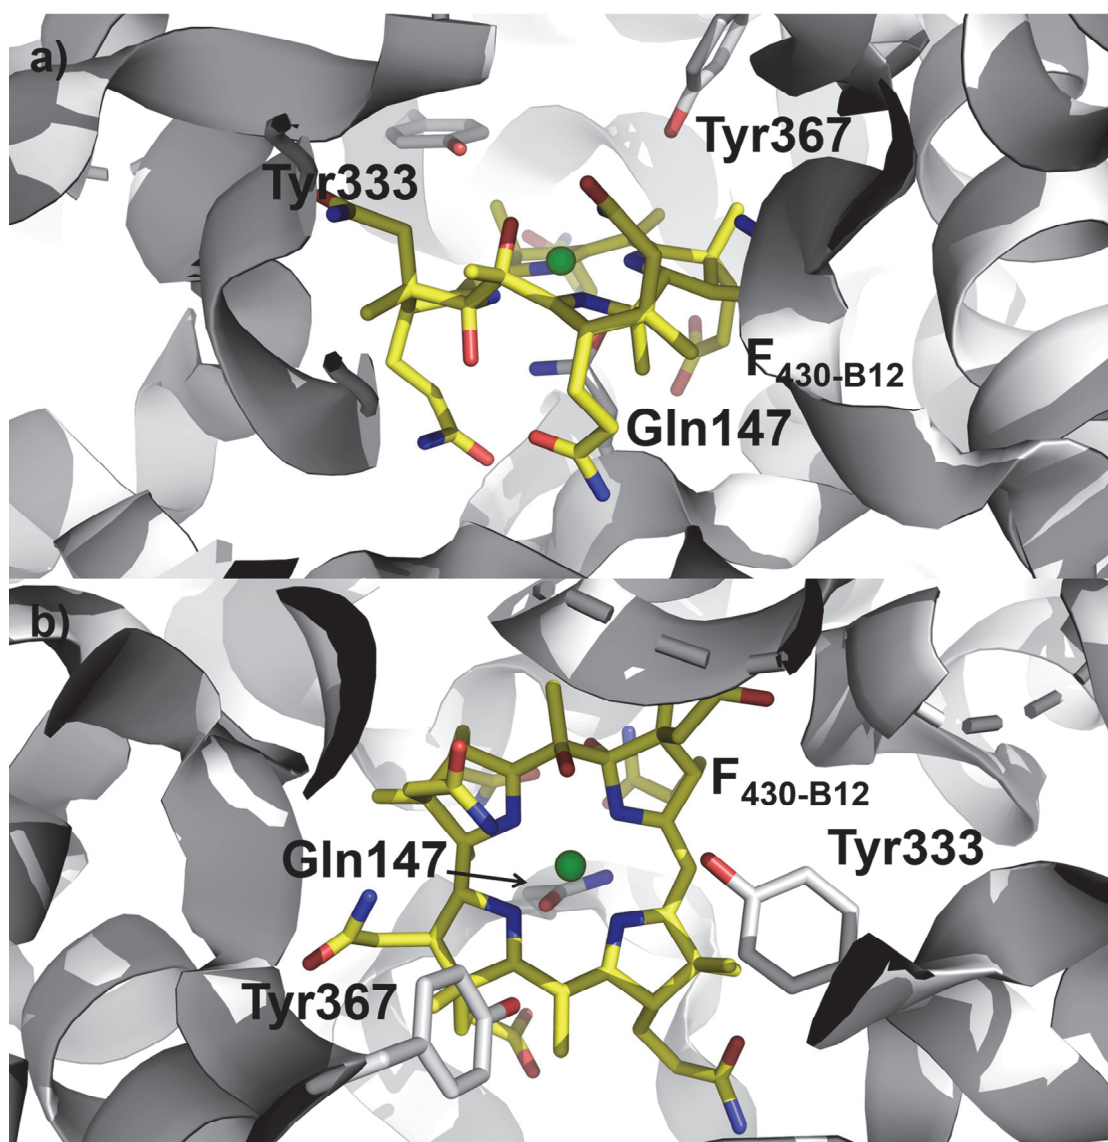

**Fig. S2** Structure of the MCR active site with a F<sub>430</sub>-B<sub>12</sub> cofactor embedded from the different views a) and b), predicted by a docking simulation. The long adenosyl tail has been hydrolyzed to a propionyloxy.

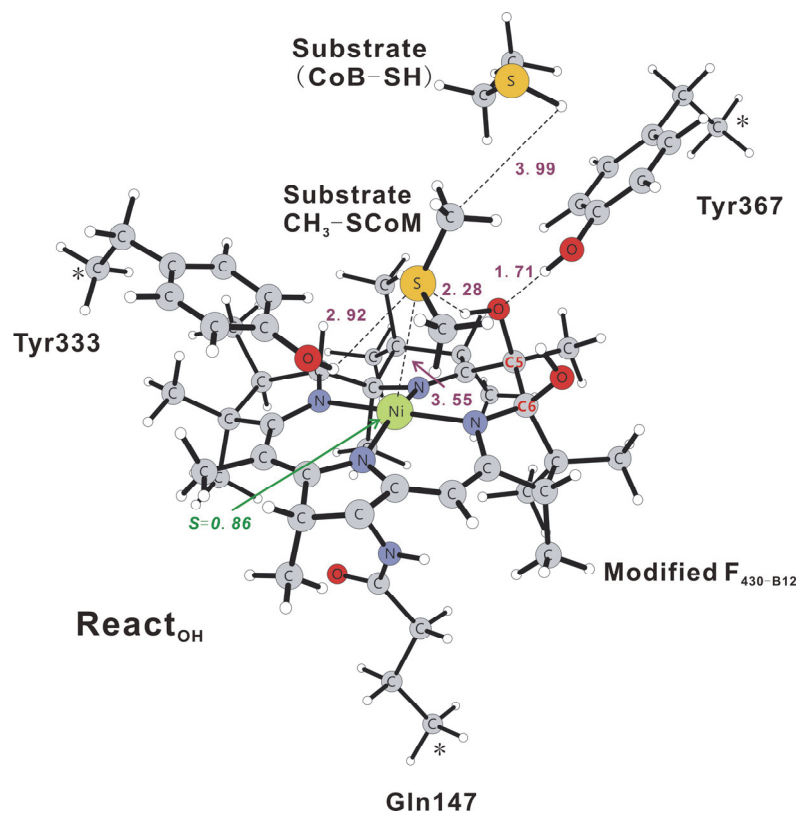

**Fig. S3** Optimized structure of the MCR active site with a modified Ni(I) F<sub>430-B12</sub> cofactor bound (**React<sub>OH</sub>**). The C6 hydroxyl is changed towards the  $\beta$  side (R configuration).

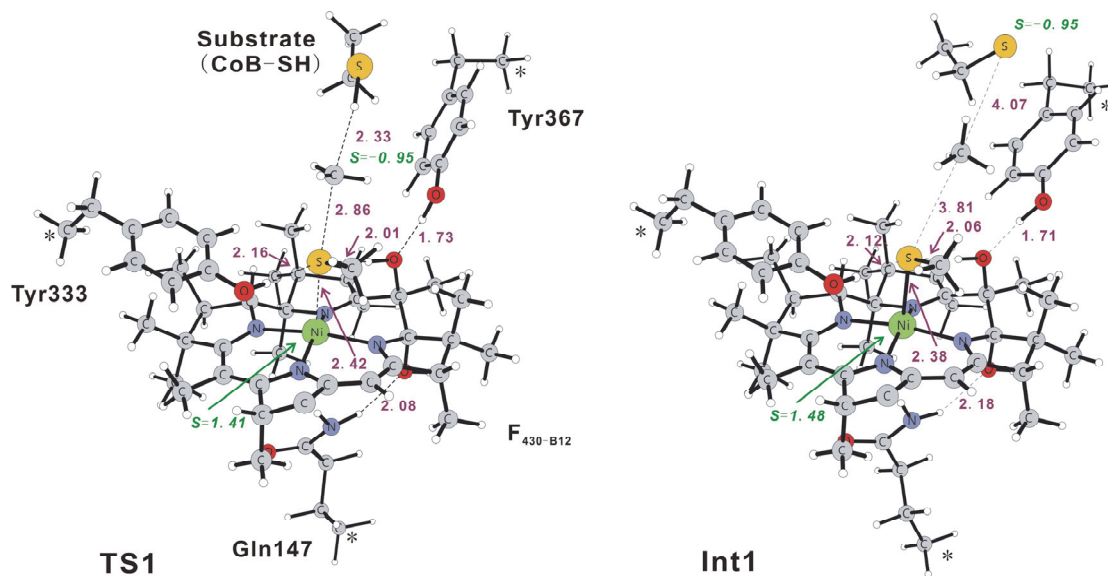

**Fig. S4** Optimized structures of the transition state for methane formation (**TS1**) and the resulting CoM-S-Ni( $F_{430-B12}$ ) intermediate (**Int1**) in the MCR reaction using the  $F_{430-B12}$  cofactor. Asterisks indicate atoms that are fixed to their X-ray positions. All distances are given in angstrom ( $\text{\AA}$ ). The unpaired spin population is indicated by "S".  $S_m$ =The sulphur of  $\text{CH}_3\text{-SCoM}$ ;  $C_m$ =The methyl carbon of  $\text{CH}_3\text{-SCoM}$ ;  $S_b$ =The sulphur of CoB-SH. For clarity, several atoms in the porphyrinoid are omitted.

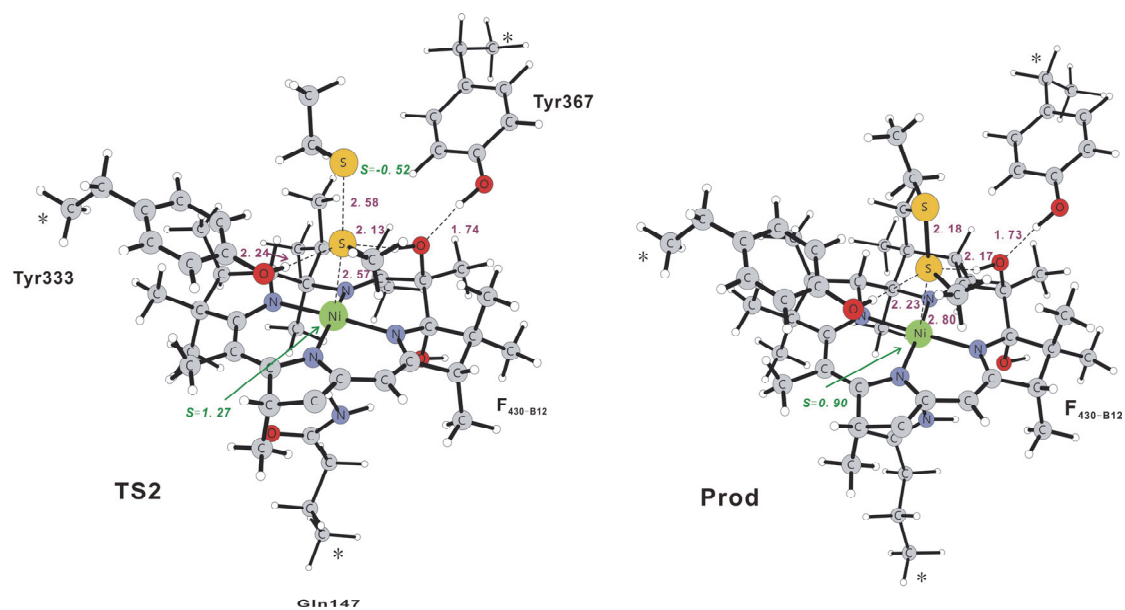

**Fig. S5** Optimized structures of the transition state for the S-S bonding (**TS2**) and the final enzyme-product complex (**Prod**).



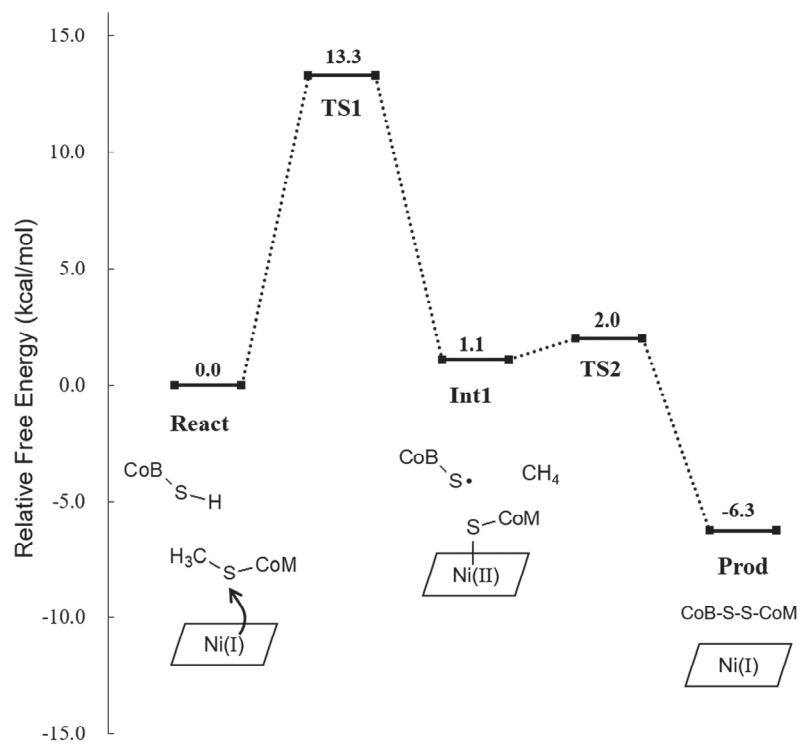

**Fig. S6** Potential energy profile for the MCR reaction using a F<sub>430-B12</sub> cofactor.

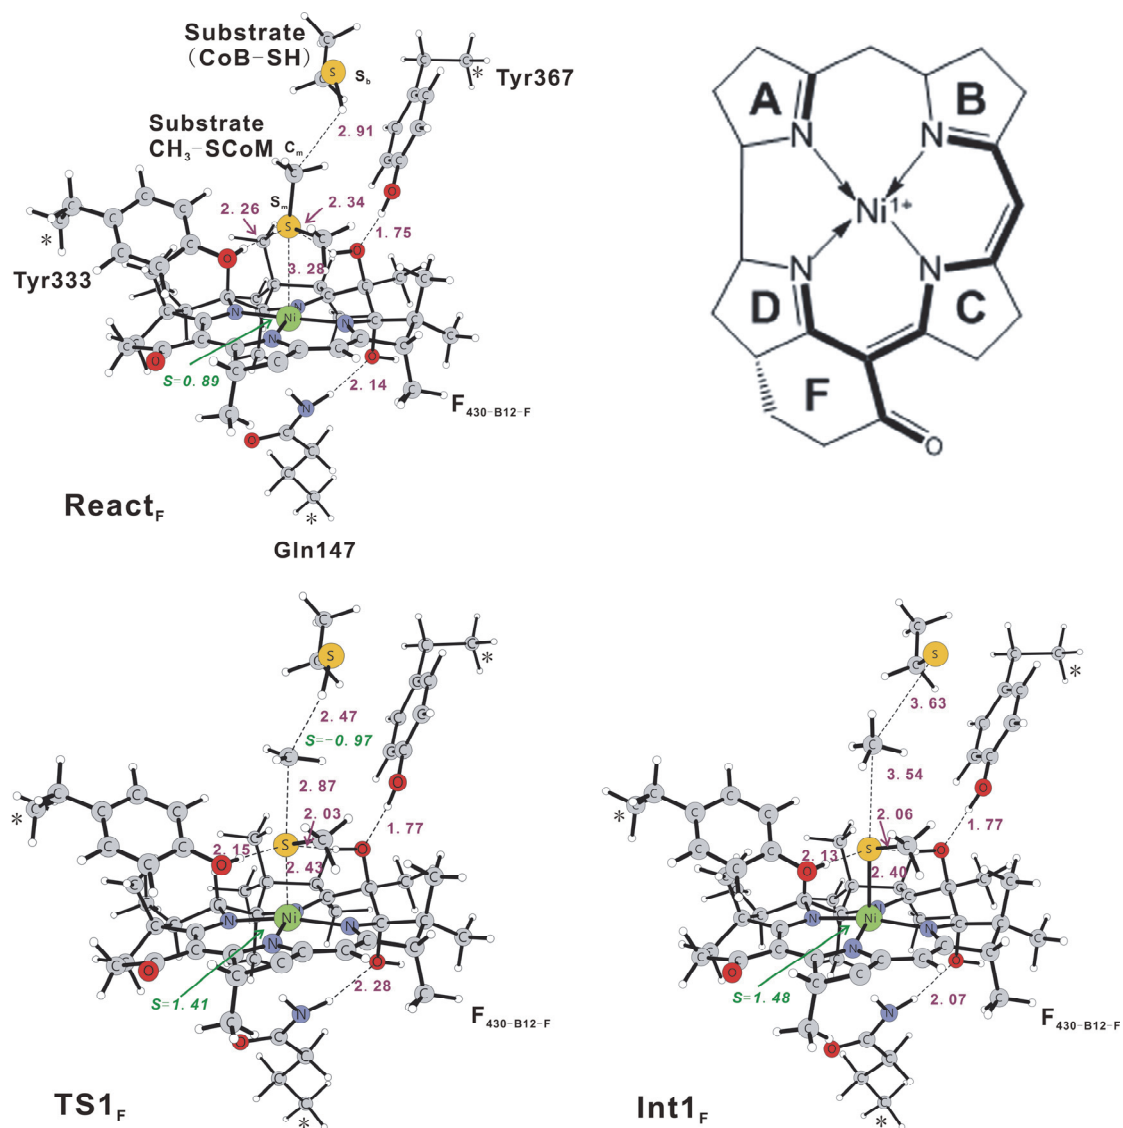

**Fig. S7** Optimized structure of the MCR active site with a F<sub>430-B12-F</sub> cofactor bound (**React<sub>F</sub>**), the schematic structure of F<sub>430-B12-F</sub> (upper right), the transition state for methane formation (**TS1<sub>F</sub>**), and the resulting CoM-S-Ni(F<sub>430-B12-F</sub>) intermediate (**Int1<sub>F</sub>**).

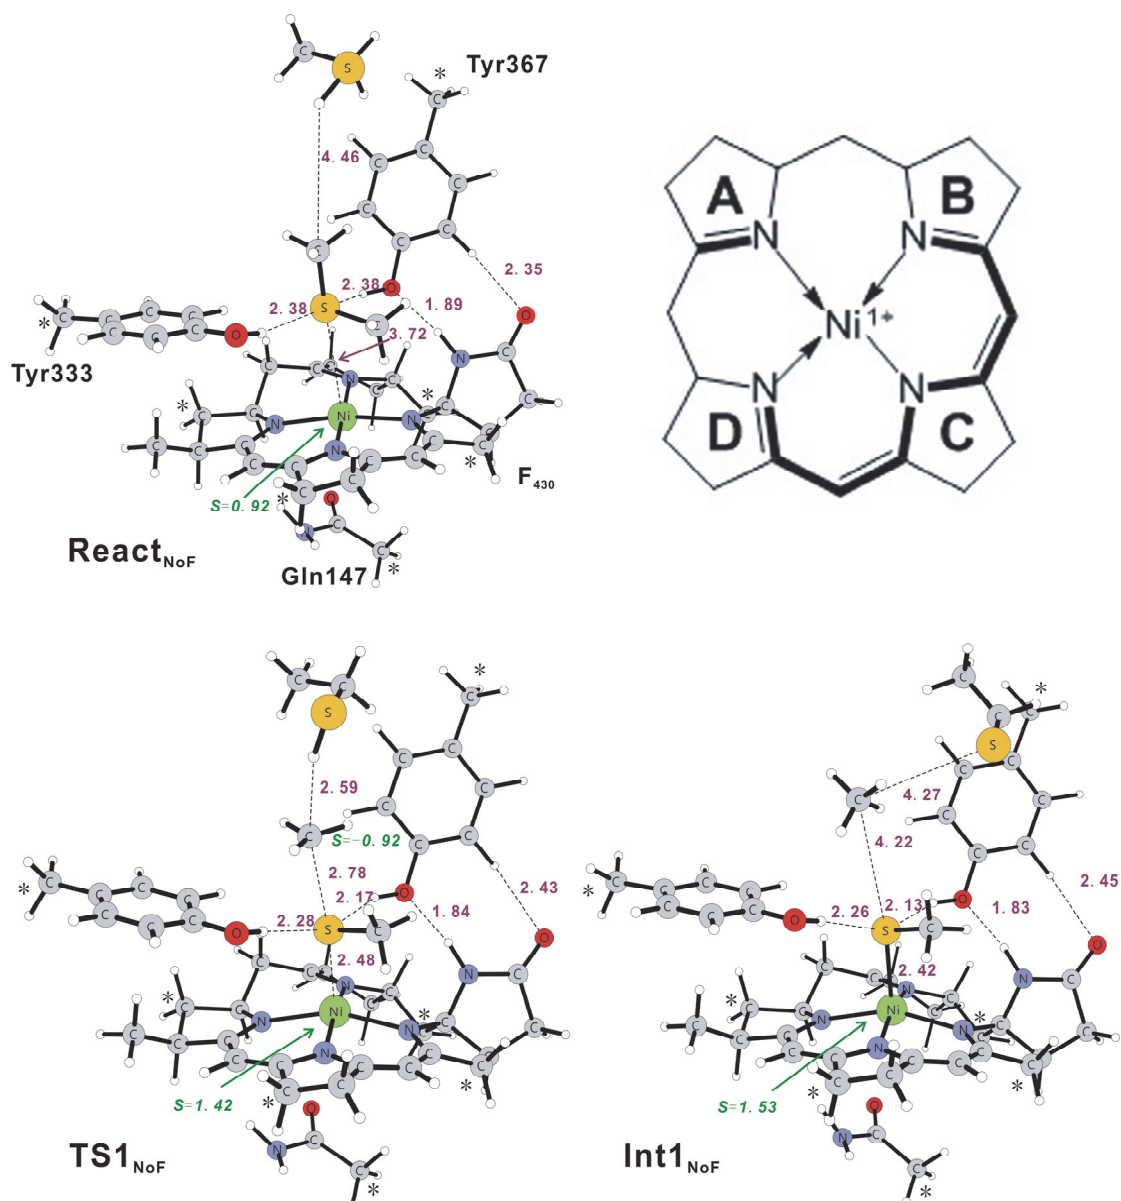

**Fig. S8** Optimized structure of the MCR active site with a F<sub>430</sub>-NoF cofactor bound (**React<sub>NoF</sub>**), the schematic structure of F<sub>430</sub>-NoF (upper right), the transition state for methane formation (**TS1<sub>NoF</sub>**), and the resulting CoM-S-Ni(F<sub>430</sub>-NoF) intermediate (**Int1<sub>NoF</sub>**).

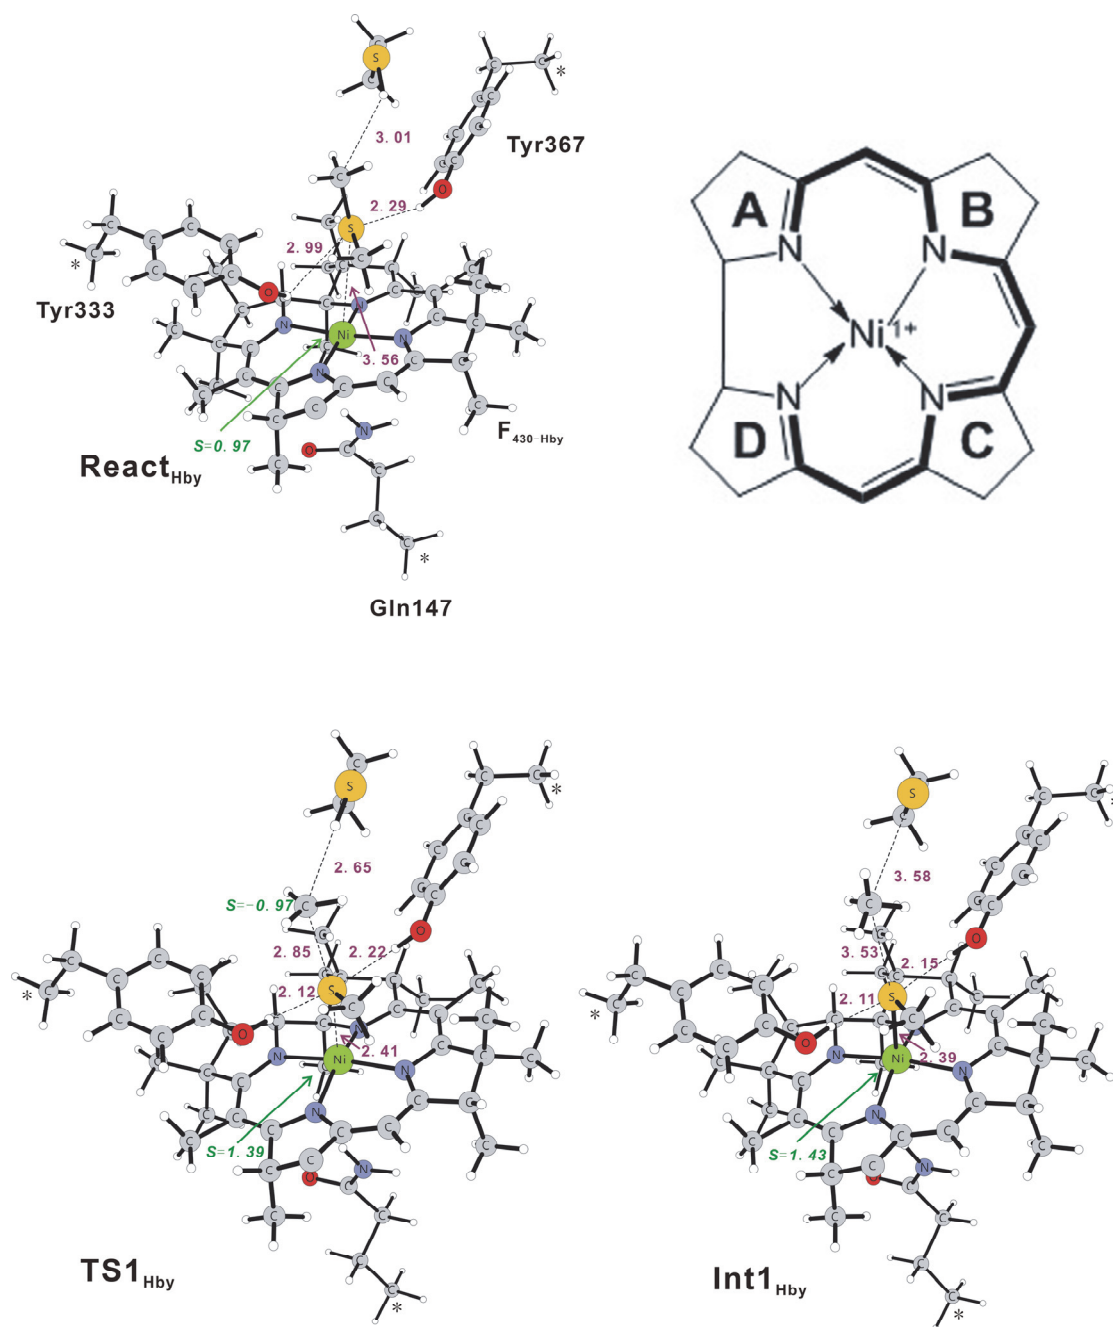

**Fig. S9** Optimized structure of the MCR active site with a F<sub>430-Hby</sub> cofactor bound (**React<sub>Hby</sub>**), the schematic structure of F<sub>430-Hby</sub> (upper right), the transition state for methane formation (**TS1<sub>Hby</sub>**), and the resulting CoM-S-Ni(F<sub>430-Hby</sub>) intermediate (**Int1<sub>Hby</sub>**).

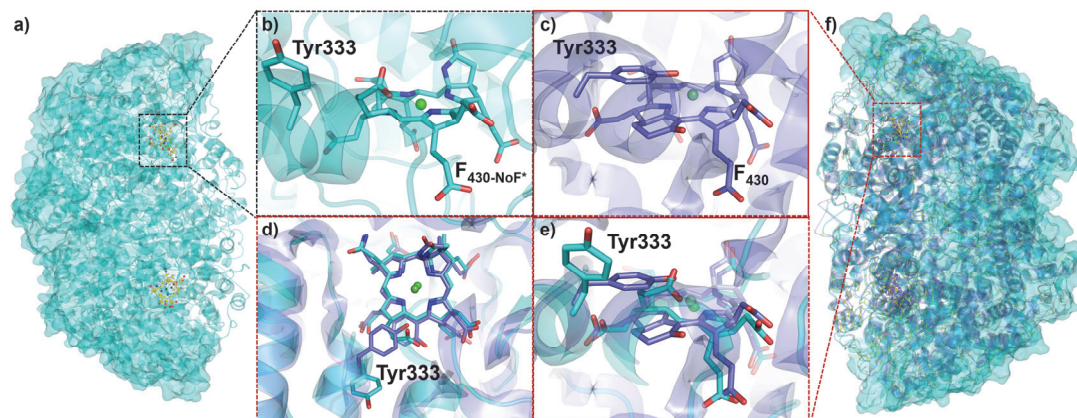

**Fig. S10** Structure of MCR in the MD simulation with the  $F_{430}$  F ring modified to its propionyloxy precursor. a) The MCR structure in the final frame of 100 ns MD simulation at 60 °C. b) The positions of Tyr333 and modified  $F_{430}$  ( $F_{430}\text{-NoF}^*$ ) from the final MD frame. c) The crystal structure of MCR containing a native  $F_{430}$  (PDB code: 1HBN).<sup>59</sup> d) and e) Superimposition between the final MD frame (cyan) and the crystal structure (purple) from the different views. f) Superimposition of all MCR structures between MD (cyan) and crystal (purple).

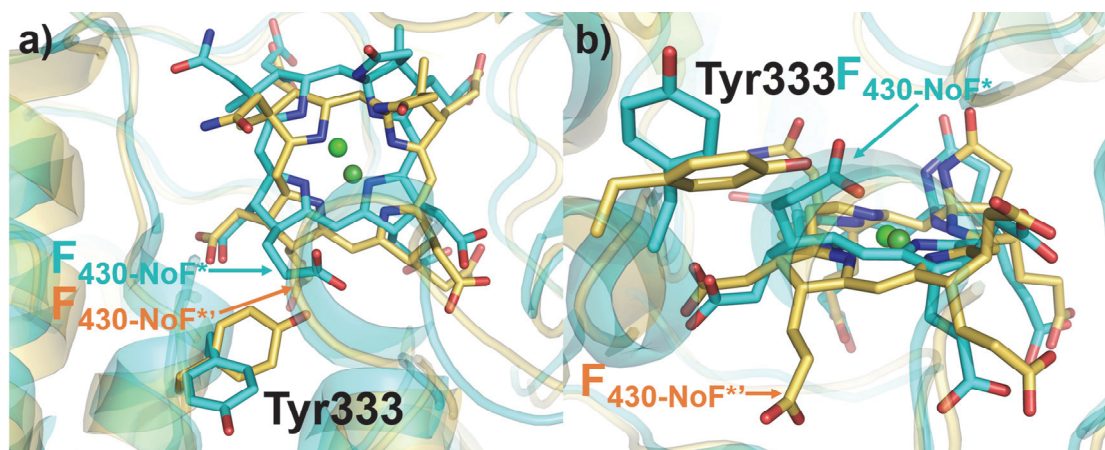

**Fig. S11** Structures of the MCR active sites in the MD simulations using a modified F<sub>430</sub> with the propionyloxy (the precursor of F ring) changed to the α face (the opposite side to Tyr333) (F<sub>430</sub>-NoF\*, in yellow). The one with the propionyloxy locating in the β face (the same side of Tyr333, a natural orientation in F<sub>430</sub>) (F<sub>430</sub>-NoF\*, in cyan) is shown also. Two different views are given in a) and b).

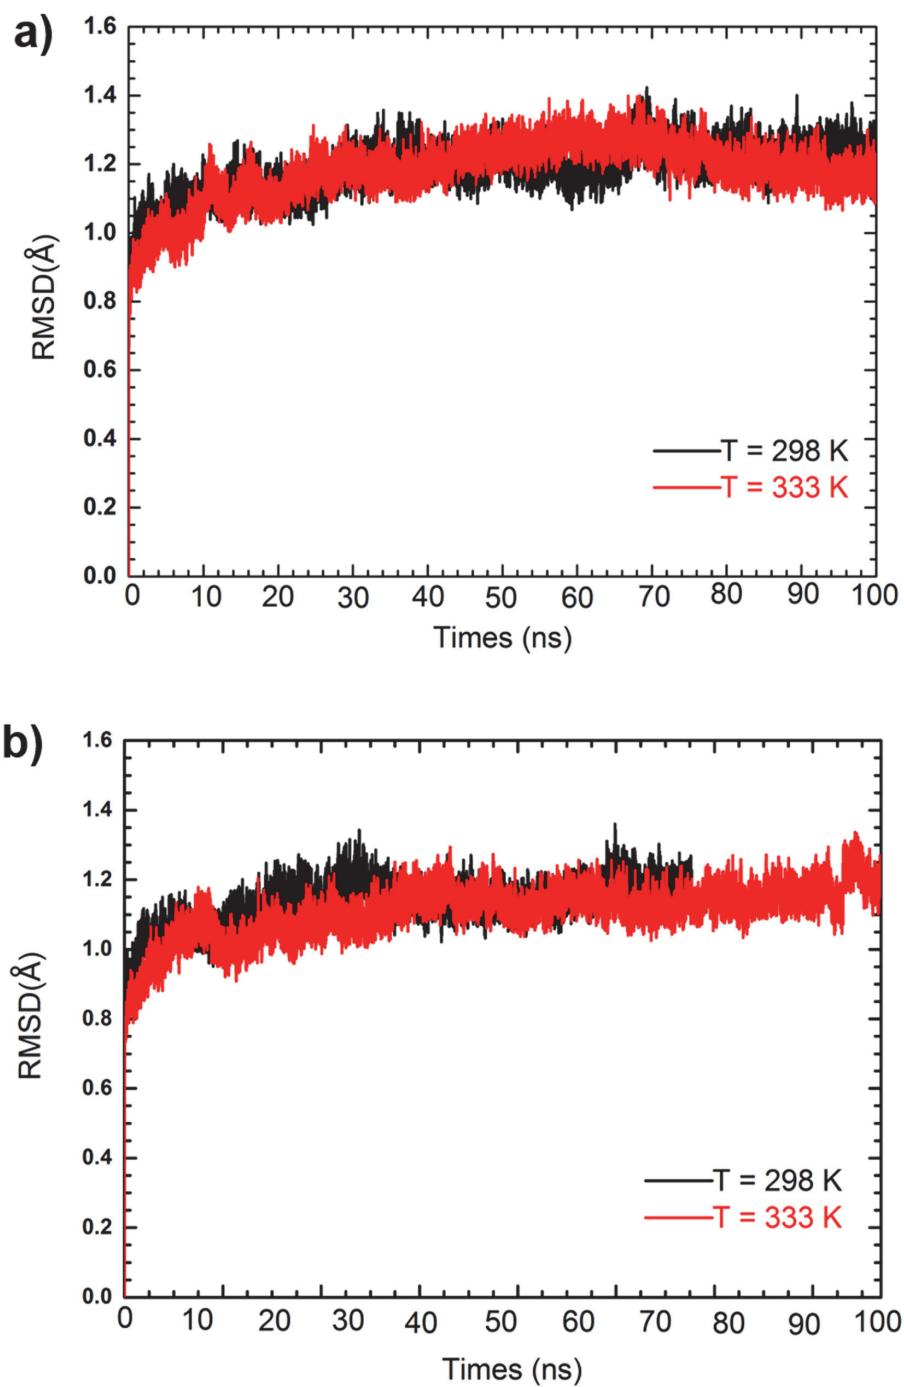

**Fig. S12** Root mean square deviation (RMSD) of the protein backbone in the molecular dynamics (MD) simulations of the MCR protein with the  $F_{430}$  F ring modified to its propionyloxy precursor in the  $\beta$  side (R configuration) (a) and the  $\alpha$  side (S configuration) (b).

**Table S1.** Unpaired spin populations of stationary points in the MCR methane Formation.

| Entry | Complex <sup>a</sup>               | Spin |                             |                             |                             |
|-------|------------------------------------|------|-----------------------------|-----------------------------|-----------------------------|
|       |                                    | Ni   | S <sub>m</sub> <sup>b</sup> | C <sub>m</sub> <sup>c</sup> | S <sub>b</sub> <sup>d</sup> |
| 1     | React                              | 0.87 | 0.00                        | 0.00                        | 0.00                        |
| 2     | TS1                                | 1.41 | 0.15                        | -0.95                       | -0.04                       |
| 3     | Int1                               | 1.48 | 0.18                        | 0.00                        | -0.95                       |
| 4     | TS2                                | 1.27 | -0.04                       | -                           | -0.52                       |
| 5     | Prod                               | 0.90 | -0.02                       | -                           | -0.05                       |
| 6     | React <sub>F</sub>                 | 0.89 | 0.00                        | 0.00                        | 0.00                        |
| 7     | TS1 <sub>F</sub>                   | 1.41 | 0.16                        | -0.97                       | -0.02                       |
| 8     | Int1 <sub>F</sub>                  | 1.48 | 0.19                        | -0.00                       | -0.97                       |
| 9     | React <sub>NoF</sub>               | 0.92 | 0.00                        | 0.00                        | 0.00                        |
| 10    | TS1 <sub>NoF</sub>                 | 1.42 | 0.16                        | -0.92                       | -0.02                       |
| 11    | Int1 <sub>NoF</sub>                | 1.53 | 0.20                        | -0.00                       | -0.97                       |
| 12    | React <sub>F430</sub> <sup>e</sup> | 0.91 | 0.00                        | 0.00                        | 0.00                        |
| 13    | TS1 <sub>F430</sub> <sup>e</sup>   | 1.40 | 0.17                        | -0.90                       | -0.02                       |
| 14    | Int1 <sub>F430</sub> <sup>e</sup>  | 1.56 | 0.17                        | 0.00                        | -0.97                       |
| 15    | React <sub>Hby</sub>               | 0.97 | 0.00                        | 0.00                        | 0.00                        |
| 16    | TS1 <sub>Hby</sub>                 | 1.37 | 0.16                        | -0.97                       | -0.01                       |
| 17    | Int1 <sub>Hby</sub>                | 1.43 | 0.12                        | -0.38                       | -0.66                       |

<sup>a</sup> Abbreviations signify reacting state (React), TS for methane formation (TS1), CoM-S-Ni(II) intermediate (Int1), transition state for the S-S bonding (TS2) and the final enzyme-product complex (Prod); subscripts indicate the F<sub>430-B12-F</sub> (F), F<sub>430-NoF</sub> (NoF), F<sub>430</sub> (F430) cofactors, and F<sub>430-Hby</sub> (Hby) cofactors. <sup>b</sup> The sulphur of CH<sub>3</sub>-SCoM. <sup>c</sup> The methyl carbon of CH<sub>3</sub>-SCoM. <sup>d</sup> The sulphur of CoB-SH. <sup>e</sup> These data are taken from the previous calculations of F<sub>430</sub>.<sup>S7c</sup>



## Cartesian Coordinates of Optimized Structures

The abbreviations used here are consistent with those in the text.

### React

|    |             |             |             |
|----|-------------|-------------|-------------|
| Ni | 0.45701870  | -2.18069955 | 2.00785910  |
| N  | 1.42438829  | -1.11938847 | 0.64059809  |
| C  | 2.46288850  | -1.00004456 | -1.49166577 |
| C  | 2.29297380  | 0.44495013  | -0.86680709 |
| C  | 1.44225444  | 0.12593340  | 0.35603937  |
| N  | -0.00247890 | -0.51423214 | 2.99756822  |
| C  | 0.46735384  | 1.07083482  | 1.09734136  |
| C  | 0.46481232  | 0.82330068  | 2.66397174  |
| C  | -0.40717842 | 1.77592114  | 3.58975350  |
| C  | -0.60746030 | 0.84708785  | 4.83322127  |
| C  | -0.54138565 | -0.53313835 | 4.20568513  |
| N  | -0.03338268 | -3.41808860 | 3.46823324  |
| C  | -0.96084892 | -1.68835280 | 4.90724495  |
| C  | -0.69412003 | -3.01347722 | 4.57658311  |
| C  | -1.12932777 | -4.21940097 | 5.40528952  |
| C  | -0.09685858 | -5.28200904 | 4.91554535  |
| C  | 0.27390144  | -4.76332947 | 3.52107986  |
| N  | 1.05569830  | -3.71775619 | 0.90976916  |
| C  | 0.90452450  | -5.50363793 | 2.53418401  |
| C  | 1.36806381  | -4.93521407 | 1.27246831  |
| C  | 2.48104864  | -4.51729027 | -0.86800128 |
| C  | 1.61665229  | -3.32430241 | -0.38752007 |
| H  | -1.47493322 | -1.50917691 | 5.84551366  |
| H  | 0.76007729  | -3.18425102 | -1.05411067 |
| C  | -3.19189671 | -1.86160335 | 1.81707426  |
| H  | -2.39094508 | -2.05340965 | 2.53313645  |
| H  | -3.94369227 | -2.65041873 | 1.89015293  |
| H  | -3.63830460 | -0.88615208 | 2.03013697  |
| S  | -2.43471706 | -1.85553495 | 0.15571183  |
| C  | -3.83159653 | -1.21231805 | -0.83450266 |
| H  | -3.51166001 | -1.20936072 | -1.87886309 |
| H  | -4.07001168 | -0.18990358 | -0.52903315 |
| H  | -4.70432142 | -1.86335509 | -0.73653537 |
| S  | -5.71628102 | 0.34812624  | -3.79206563 |
| C  | -3.94592419 | 0.58716129  | -4.27263133 |
| H  | -3.43128126 | -0.37851350 | -4.23186472 |
| H  | -3.48538989 | 1.26070751  | -3.55067727 |
| C  | -3.86455400 | 1.18191800  | -5.67637300 |
| H  | -4.34519413 | 2.16381489  | -5.70700442 |
| H  | -2.81501124 | 1.30783751  | -5.96481180 |
| H  | -4.34486533 | 0.53742588  | -6.42084583 |
| C  | 2.32031344  | -1.92272885 | -0.21808172 |
| C  | 3.62469807  | -2.10660519 | 0.58585244  |
| H  | 3.41680887  | -2.70300422 | 1.47531510  |
| H  | 4.40096572  | -2.61045008 | 0.00722615  |
| H  | 4.01800247  | -1.14628749 | 0.92204680  |
| C  | 1.27317332  | -1.19079272 | -2.45957837 |
| H  | 1.32796452  | -0.44616777 | -3.26189148 |
| H  | 1.27428618  | -2.17728354 | -2.92953424 |
| H  | 0.31376320  | -1.05950036 | -1.94682676 |
| C  | 3.76966385  | -1.20281724 | -2.26569062 |
| H  | 3.83185627  | -2.23003478 | -2.64138283 |
| H  | 3.81561839  | -0.53192972 | -3.13127633 |
| H  | 4.65663164  | -1.01930003 | -1.65533600 |
| O  | 1.85829105  | 0.87048164  | 3.07404888  |

|   |             |             |             |
|---|-------------|-------------|-------------|
| H | 2.14655096  | 1.79133361  | 3.09048047  |
| C | -1.80694926 | 2.04346775  | 2.99804997  |
| H | -2.30882873 | 1.11097407  | 2.73071526  |
| H | -2.42071835 | 2.55666262  | 3.74657989  |
| H | -1.78806025 | 2.67235453  | 2.10815994  |
| C | 0.24101155  | 3.11792952  | 3.96401752  |
| H | 0.30157676  | 3.80163210  | 3.11454035  |
| H | -0.36519801 | 3.61342385  | 4.73008303  |
| H | 1.24293274  | 3.00439646  | 4.38954126  |
| C | -1.13866752 | -3.97816293 | 6.91883678  |
| H | -1.93752139 | -3.28173863 | 7.19476465  |
| H | -1.32640621 | -4.91501392 | 7.45517399  |
| H | -0.19305256 | -3.56198245 | 7.27568745  |
| C | -2.54679774 | -4.62985534 | 4.93320449  |
| H | -2.88045509 | -5.52395316 | 5.47369034  |
| H | -3.26519404 | -3.82598963 | 5.12859724  |
| H | -2.55596042 | -4.84866397 | 3.86111629  |
| C | 1.06043086  | -6.99695545 | 2.76289545  |
| H | 0.41041256  | -7.56241466 | 2.08518096  |
| H | 2.08380159  | -7.34772590 | 2.61072403  |
| H | 0.78285533  | -7.28440086 | 3.77539798  |
| C | 2.33246339  | -5.61614803 | 0.26781610  |
| C | 1.81029390  | -6.95924674 | -0.28175495 |
| H | 1.85430833  | -7.74474566 | 0.47122151  |
| H | 0.77881827  | -6.88714537 | -0.63073698 |
| H | 2.43213423  | -7.29270899 | -1.11791742 |
| C | 3.71144671  | -5.82779132 | 0.93821978  |
| H | 3.67605416  | -6.58901439 | 1.72100713  |
| H | 4.43632353  | -6.16062485 | 0.18511873  |
| H | 4.08248394  | -4.91025843 | 1.40277467  |
| C | 0.76159825  | 2.53539777  | 0.76256696  |
| H | 1.67901350  | 2.88019726  | 1.24475957  |
| H | 0.87449957  | 2.67076942  | -0.31386244 |
| H | -0.06253137 | 3.17121756  | 1.08239936  |
| O | -0.81280444 | 0.79335950  | 0.52272950  |
| H | -1.04111994 | -0.16224439 | 0.59553350  |
| H | -1.60103403 | 1.01952359  | 5.26548363  |
| C | 0.42663216  | 0.97238432  | 5.96869839  |
| H | 0.38038508  | 1.95565893  | 6.44805196  |
| H | 0.22762172  | 0.21617068  | 6.73410570  |
| H | 1.43960441  | 0.81085328  | 5.59259349  |
| C | 1.17787168  | -5.36585385 | 5.77922300  |
| H | 1.66435240  | -4.38706063 | 5.84746498  |
| H | 0.95344802  | -5.71404850 | 6.79259720  |
| H | 1.90175222  | -6.05234269 | 5.33308563  |
| H | -0.57544395 | -6.26461595 | 4.87726287  |
| H | 3.53273133  | -4.22161486 | -0.89503598 |
| C | 2.10879812  | -4.95056675 | -2.29119338 |
| H | 2.25372508  | -4.11679942 | -2.98673291 |
| H | 2.73420379  | -5.77498751 | -2.64677708 |
| H | 1.06347904  | -5.26471905 | -2.35699363 |
| C | 3.58178978  | 1.22662932  | -0.54513152 |
| H | 3.34604484  | 2.21726704  | -0.14814026 |
| H | 4.20628861  | 0.71479492  | 0.18997718  |
| H | 4.17758275  | 1.37205592  | -1.45119622 |
| H | 1.71285916  | 1.06159467  | -1.56585750 |
| H | -5.52404035 | 0.33999227  | -2.45929227 |
| C | 0.03880500  | -8.95451900 | -3.01748400 |
| C | -1.45489891 | -8.59932598 | -2.87404606 |
| C | -1.69219823 | -7.62073992 | -1.74370556 |
| C | -2.01868111 | -8.05557897 | -0.45287545 |

|   |             |             |             |
|---|-------------|-------------|-------------|
| C | -1.49796258 | -6.24639917 | -1.93614593 |
| C | -2.12841421 | -7.16134350 | 0.61237910  |
| C | -1.59163843 | -5.33993225 | -0.88274086 |
| C | -1.90137969 | -5.79836148 | 0.40409445  |
| O | -2.01933504 | -4.95644877 | 1.47341266  |
| C | -2.33178300 | 6.38467200  | -4.58248000 |
| C | -2.62334567 | 4.91055515  | -4.91812160 |
| C | -2.76687052 | 4.07446895  | -3.66594475 |
| C | -3.97116780 | 4.06070575  | -2.94734011 |
| C | -1.69125609 | 3.34762162  | -3.14506005 |
| C | -4.09708646 | 3.37066114  | -1.74530409 |
| C | -1.80130439 | 2.63705289  | -1.94976062 |
| C | -3.00537543 | 2.66166062  | -1.23087369 |
| O | -3.16711931 | 2.00587882  | -0.04855144 |
| H | -2.03368363 | -9.51544070 | -2.70380931 |
| H | -1.81700281 | -8.17225550 | -3.81810441 |
| H | -2.17636504 | -9.11700360 | -0.27250832 |
| H | -1.26009033 | -5.87741527 | -2.93225111 |
| H | -2.37144924 | -7.50203586 | 1.61433772  |
| H | -1.44167622 | -4.27837155 | -1.04310780 |
| H | -1.41820289 | -4.20054144 | 1.36364921  |
| H | 0.41865692  | -9.40991377 | -2.09660336 |
| H | -3.54146199 | 4.84782964  | -5.51616982 |
| H | -1.81676505 | 4.50915750  | -5.54415218 |
| H | -0.74829624 | 3.32625738  | -3.68852726 |
| H | -4.83039052 | 4.60056650  | -3.33936479 |
| H | -0.97558678 | 2.04349445  | -1.57406805 |
| H | -5.03253045 | 3.36284304  | -1.19466102 |
| H | -2.31159422 | 1.60266057  | 0.21565112  |
| H | -1.40525142 | 6.47374915  | -4.00496520 |
| H | 0.63413027  | -8.05495126 | -3.20770118 |
| H | 0.20562474  | -9.65698082 | -3.84224237 |
| H | -3.13982185 | 6.81043247  | -3.97794717 |
| H | -2.22899511 | 6.99063059  | -5.49011945 |
| C | 7.27036300  | -0.96856400 | 5.68488600  |
| C | 6.04420584  | -1.85895767 | 5.45349308  |
| C | 5.19353326  | -1.42280380 | 4.24655916  |
| C | 4.03432902  | -2.39614114 | 4.03464961  |
| O | 4.24002225  | -3.59137532 | 3.82426484  |
| N | 2.78440606  | -1.87189138 | 4.15334183  |
| H | 5.41116797  | -1.85755694 | 6.35081977  |
| H | 6.34769187  | -2.89860062 | 5.28938182  |
| H | 4.83350605  | -0.39475652 | 4.38079887  |
| H | 5.80962077  | -1.44389001 | 3.33836615  |
| H | 2.61036272  | -0.88776849 | 3.98203762  |
| H | 2.01555418  | -2.48183690 | 3.89184324  |
| H | 6.97894152  | 0.07224842  | 5.87148874  |
| H | 7.93401328  | -0.97479427 | 4.81177548  |
| H | 7.85165866  | -1.31147739 | 6.54772056  |

#### TS1

|    |             |             |             |
|----|-------------|-------------|-------------|
| Ni | 0.34498200  | -2.17618200 | 2.28925900  |
| N  | 1.51935000  | -1.09582600 | 1.04966000  |
| C  | 2.51727600  | -0.95658100 | -1.09844300 |
| C  | 2.36676500  | 0.47725500  | -0.45160800 |
| C  | 1.52504400  | 0.14851200  | 0.77393000  |
| N  | 0.02522600  | -0.51643500 | 3.37676100  |
| C  | 0.54460500  | 1.10280400  | 1.49908600  |
| C  | 0.49928100  | 0.82597900  | 3.06090500  |
| C  | -0.40051700 | 1.76260300  | 3.97334500  |

|   |             |             |             |
|---|-------------|-------------|-------------|
| C | -0.62352700 | 0.82095200  | 5.20406600  |
| C | -0.54552100 | -0.54974400 | 4.56423300  |
| N | -0.05518500 | -3.41848900 | 3.78034000  |
| C | -1.00795700 | -1.71259300 | 5.22976700  |
| C | -0.76075400 | -3.03107800 | 4.86791900  |
| C | -1.25681500 | -4.25153000 | 5.63445700  |
| C | -0.20257100 | -5.30706400 | 5.18219000  |
| C | 0.22832800  | -4.77281800 | 3.81347000  |
| N | 1.14815100  | -3.68810500 | 1.28696600  |
| C | 0.89006900  | -5.50701400 | 2.84917900  |
| C | 1.39547600  | -4.92248700 | 1.60921700  |
| C | 2.50376900  | -4.48670600 | -0.53031200 |
| C | 1.67735800  | -3.28356600 | -0.01301800 |
| H | -1.55493600 | -1.54652900 | 6.15041800  |
| H | 0.80068200  | -3.12531900 | -0.64898300 |
| C | -2.99376600 | -1.66186900 | 2.11666700  |
| H | -2.57695500 | -1.53976600 | 3.11654700  |
| H | -3.69052700 | -2.50350000 | 2.12574700  |
| H | -3.53205800 | -0.75601400 | 1.82881800  |
| S | -1.64054600 | -1.98971000 | 0.91124600  |
| C | -3.49205000 | -1.16854800 | -1.10087700 |
| H | -2.83253100 | -1.37347300 | -1.93295600 |
| H | -3.51562300 | -0.17875900 | -0.66479300 |
| H | -4.19472300 | -1.92698300 | -0.78326200 |
| S | -5.53460600 | 0.23113200  | -3.67983600 |
| C | -3.82010600 | 0.57889600  | -4.27500100 |
| H | -3.25838600 | -0.35986200 | -4.27873900 |
| H | -3.34256400 | 1.26810900  | -3.57651200 |
| C | -3.86455400 | 1.18191800  | -5.67637300 |
| H | -4.42210900 | 2.12405100  | -5.67887100 |
| H | -2.84752500 | 1.39653300  | -6.02227100 |
| H | -4.33531300 | 0.50183300  | -6.39336900 |
| C | 2.39752500  | -1.89649300 | 0.16535600  |
| C | 3.71433600  | -2.10671600 | 0.93744900  |
| H | 3.52873900  | -2.73615500 | 1.80862600  |
| H | 4.47398200  | -2.59181200 | 0.32284900  |
| H | 4.11881200  | -1.15913800 | 1.29399900  |
| C | 1.30671400  | -1.12806600 | -2.04395100 |
| H | 1.35023500  | -0.36945700 | -2.83257700 |
| H | 1.30018700  | -2.10449100 | -2.53268500 |
| H | 0.35574100  | -1.00572400 | -1.51464000 |
| C | 3.80678700  | -1.15582100 | -1.89988200 |
| H | 3.85694500  | -2.17838900 | -2.28811500 |
| H | 3.83683200  | -0.47669700 | -2.75881200 |
| H | 4.70615800  | -0.98182400 | -1.30567300 |
| O | 1.88257600  | 0.85923300  | 3.50613300  |
| H | 2.17081400  | 1.77842800  | 3.56560400  |
| C | -1.78497400 | 2.02335200  | 3.34227300  |
| H | -2.27478900 | 1.09054400  | 3.05651800  |
| H | -2.41972200 | 2.53327200  | 4.07470200  |
| H | -1.74175100 | 2.65042400  | 2.45229000  |
| C | 0.22869300  | 3.10370000  | 4.37950300  |
| H | 0.30354000  | 3.79753800  | 3.54070500  |
| H | -0.40069000 | 3.58358100  | 5.13586800  |
| H | 1.22014800  | 2.99225500  | 4.82870500  |
| C | -1.36780300 | -4.05414100 | 7.14927200  |
| H | -2.18253900 | -3.36361100 | 7.38921600  |
| H | -1.59543400 | -5.00627500 | 7.63979700  |
| H | -0.44787100 | -3.65472900 | 7.58320500  |
| C | -2.64198900 | -4.63505100 | 5.05431200  |
| H | -3.01887100 | -5.53173000 | 5.55915900  |

|   |             |             |             |
|---|-------------|-------------|-------------|
| H | -3.36284100 | -3.82630000 | 5.21184100  |
| H | -2.57994400 | -4.84097900 | 3.98203200  |
| C | 1.03610400  | -7.00171600 | 3.06681900  |
| H | 0.37020700  | -7.55640000 | 2.39689600  |
| H | 2.05335100  | -7.35733200 | 2.89299600  |
| H | 0.77803600  | -7.29315200 | 4.08285900  |
| C | 2.32079900  | -5.61312200 | 0.57391800  |
| C | 1.74158300  | -6.91577000 | -0.01137400 |
| H | 1.73064600  | -7.71691700 | 0.72531200  |
| H | 0.72423600  | -6.78499700 | -0.38046500 |
| H | 2.36605900  | -7.26144200 | -0.84003100 |
| C | 3.69693800  | -5.89738200 | 1.22252600  |
| H | 3.64648800  | -6.69795000 | 1.96317200  |
| H | 4.40468700  | -6.21208800 | 0.44675300  |
| H | 4.09846200  | -5.01528800 | 1.72862100  |
| C | 0.88385800  | 2.56841400  | 1.20932500  |
| H | 1.79646300  | 2.88963800  | 1.71591800  |
| H | 1.01470000  | 2.72191900  | 0.13771700  |
| H | 0.06084300  | 3.20730500  | 1.52420800  |
| O | -0.70472100 | 0.87286000  | 0.86271600  |
| H | -0.95591700 | -0.10107700 | 0.89116300  |
| H | -1.62574000 | 0.98412400  | 5.61873700  |
| C | 0.39056500  | 0.93069700  | 6.35909300  |
| H | 0.33031500  | 1.90660600  | 6.84932400  |
| H | 0.18138800  | 0.16409300  | 7.11054700  |
| H | 1.41035900  | 0.77994200  | 5.99813400  |
| C | 1.03208800  | -5.39087900 | 6.10258400  |
| H | 1.49839700  | -4.40688400 | 6.21675200  |
| H | 0.76459800  | -5.76428000 | 7.09536900  |
| H | 1.78888200  | -6.05392300 | 5.67777600  |
| H | -0.67524300 | -6.29006600 | 5.11083700  |
| H | 3.56381800  | -4.22309800 | -0.54578300 |
| C | 2.11651900  | -4.86743300 | -1.96419900 |
| H | 2.29327900  | -4.02226100 | -2.63722900 |
| H | 2.71277200  | -5.70355400 | -2.33993100 |
| H | 1.06080700  | -5.14233600 | -2.03744600 |
| C | 3.66348200  | 1.24422500  | -0.13050200 |
| H | 3.44041500  | 2.23198600  | 0.27823400  |
| H | 4.29064800  | 0.71871700  | 0.59196700  |
| H | 4.24900400  | 1.39274600  | -1.04172300 |
| H | 1.78052800  | 1.10873600  | -1.13015600 |
| H | -5.14853000 | -0.31247100 | -2.49872600 |
| C | 0.03880500  | -8.95451900 | -3.01748400 |
| C | -1.43314200 | -8.55552700 | -2.81114200 |
| C | -1.62214000 | -7.60500800 | -1.64911000 |
| C | -1.84076400 | -8.07969600 | -0.34791600 |
| C | -1.53979800 | -6.21763500 | -1.82634200 |
| C | -1.97215900 | -7.21076000 | 0.73314500  |
| C | -1.66525600 | -5.33013900 | -0.75719400 |
| C | -1.88773900 | -5.82524000 | 0.53766700  |
| O | -2.04502400 | -5.02053300 | 1.61719000  |
| C | -2.33178300 | 6.38467200  | -4.58248000 |
| C | -2.47515000 | 4.87192400  | -4.84001400 |
| C | -2.60217100 | 4.07173000  | -3.56114700 |
| C | -3.81969300 | 4.02850100  | -2.86355500 |
| C | -1.51491900 | 3.38520500  | -3.00870000 |
| C | -3.94452600 | 3.35621100  | -1.65250700 |
| C | -1.62251400 | 2.69549500  | -1.79846000 |
| C | -2.83797200 | 2.69839400  | -1.09873200 |
| O | -3.00269500 | 2.07814400  | 0.10174500  |
| H | -2.03265300 | -9.45983900 | -2.64957700 |

|   |             |             |             |
|---|-------------|-------------|-------------|
| H | -1.81333600 | -8.09294800 | -3.73032000 |
| H | -1.91150100 | -9.15185000 | -0.17764900 |
| H | -1.38185700 | -5.81764500 | -2.82597100 |
| H | -2.15247600 | -7.58218900 | 1.73704200  |
| H | -1.61846300 | -4.25799400 | -0.91580900 |
| H | -1.81674200 | -4.09059600 | 1.37920100  |
| H | 0.43554700  | -9.44669800 | -2.12305000 |
| H | -3.35543300 | 4.69753300  | -5.47177000 |
| H | -1.61031200 | 4.51686400  | -5.41366000 |
| H | -0.56339500 | 3.38088900  | -3.53672900 |
| H | -4.68977700 | 4.52903200  | -3.28197900 |
| H | -0.78108400 | 2.14205000  | -1.39389000 |
| H | -4.89036300 | 3.32002600  | -1.12271400 |
| H | -2.14863800 | 1.69680500  | 0.39678600  |
| H | -1.43957500 | 6.59250600  | -3.98235400 |
| H | 0.65679500  | -8.06976200 | -3.20548300 |
| H | 0.15326700  | -9.63912900 | -3.86504100 |
| H | -3.19695200 | 6.76659400  | -4.03054300 |
| H | -2.25220300 | 6.94283600  | -5.52174400 |
| C | 7.27036300  | -0.96856400 | 5.68488600  |
| C | 6.03185400  | -1.86423900 | 5.58968200  |
| C | 5.09000700  | -1.47476800 | 4.43721100  |
| C | 3.92073700  | -2.45211700 | 4.34932000  |
| O | 4.10853900  | -3.65493000 | 4.17217000  |
| N | 2.68223000  | -1.91720700 | 4.52864100  |
| H | 5.47300500  | -1.82468300 | 6.53364600  |
| H | 6.32230200  | -2.90994200 | 5.44468300  |
| H | 4.74089600  | -0.44169000 | 4.55561300  |
| H | 5.63430800  | -1.53340700 | 3.48645800  |
| H | 2.50606900  | -0.93256700 | 4.36653500  |
| H | 1.89439300  | -2.53692400 | 4.38027200  |
| H | 6.99313200  | 0.07904000  | 5.85170600  |
| H | 7.86044000  | -1.01148100 | 4.76195000  |
| H | 7.91953200  | -1.27680700 | 6.51079700  |

#### Int1

|    |             |             |             |
|----|-------------|-------------|-------------|
| Ni | 0.47161487  | -2.26411189 | 2.08849214  |
| N  | 1.34340605  | -1.08103080 | 0.69158003  |
| C  | 2.02421572  | -0.84520956 | -1.56654600 |
| C  | 1.86108893  | 0.56952873  | -0.87442924 |
| C  | 1.22438706  | 0.16521505  | 0.44876478  |
| N  | 0.24340476  | -0.63526696 | 3.25152834  |
| C  | 0.30585225  | 1.02797086  | 1.34554898  |
| C  | 0.55405500  | 0.74062233  | 2.88709065  |
| C  | -0.24168926 | 1.60095176  | 3.95862477  |
| C  | -0.19009249 | 0.63312899  | 5.18787840  |
| C  | -0.11778006 | -0.72285549 | 4.51552325  |
| N  | 0.47217542  | -3.53627976 | 3.61605441  |
| C  | -0.36939415 | -1.92163333 | 5.22763558  |
| C  | -0.07766536 | -3.21281953 | 4.80971202  |
| C  | -0.33169703 | -4.47101005 | 5.63127013  |
| C  | 0.71115456  | -5.43705812 | 4.98885751  |
| C  | 0.86798766  | -4.86218310 | 3.57804532  |
| N  | 1.24359142  | -3.69957067 | 0.94503625  |
| C  | 1.41878051  | -5.53283759 | 2.50442200  |
| C  | 1.65810562  | -4.90377734 | 1.20813327  |
| C  | 2.34742016  | -4.36975032 | -1.08253731 |
| C  | 1.52048863  | -3.24246891 | -0.41549344 |
| H  | -0.76802554 | -1.80240272 | 6.22866185  |
| H  | 0.54270022  | -3.14656808 | -0.89940497 |

|   |             |             |             |
|---|-------------|-------------|-------------|
| C | -2.88097257 | -2.09067292 | 2.57417702  |
| H | -2.40231867 | -1.55654588 | 3.39640264  |
| H | -3.18905547 | -3.07633832 | 2.93343864  |
| H | -3.76520959 | -1.53783439 | 2.24635380  |
| S | -1.72134306 | -2.26968969 | 1.15527501  |
| C | -4.29270901 | -0.32255179 | -0.86859595 |
| H | -3.41299576 | -0.20924135 | -1.50671776 |
| H | -4.24635095 | 0.42399769  | -0.07355034 |
| H | -4.28866338 | -1.32682681 | -0.43966071 |
| S | -5.80616119 | 2.03814413  | -3.82365659 |
| C | -4.35711047 | 1.02181033  | -4.23429128 |
| H | -4.56299985 | -0.02549936 | -3.99007479 |
| H | -3.58813048 | 1.36474294  | -3.52842221 |
| C | -3.86454600 | 1.18192800  | -5.67638000 |
| H | -3.62325885 | 2.22778885  | -5.88875813 |
| H | -2.96286715 | 0.57760176  | -5.83647509 |
| H | -4.62229366 | 0.85372399  | -6.39488352 |
| C | 2.14896612  | -1.80221869 | -0.31837964 |
| C | 3.57183279  | -1.91392683 | 0.26508065  |
| H | 3.54620334  | -2.53229918 | 1.16390477  |
| H | 4.26515848  | -2.36971138 | -0.44351521 |
| H | 3.96405672  | -0.93596187 | 0.54643358  |
| C | 0.70881358  | -1.09970367 | -2.33774342 |
| H | 0.58122897  | -0.33172213 | -3.10914796 |
| H | 0.70550963  | -2.06961700 | -2.84073385 |
| H | -0.16443948 | -1.05886344 | -1.67718264 |
| C | 3.20210849  | -0.93911368 | -2.54147130 |
| H | 3.26993210  | -1.95066973 | -2.95652457 |
| H | 3.06508149  | -0.24755534 | -3.38047869 |
| H | 4.16117072  | -0.70757382 | -2.07252885 |
| O | 1.98660128  | 0.87582555  | 3.09080163  |
| H | 2.21081908  | 1.81473351  | 3.09225487  |
| C | -1.72838848 | 1.77646701  | 3.57738371  |
| H | -2.19306780 | 0.82156196  | 3.32272114  |
| H | -2.26668660 | 2.20015220  | 4.43289887  |
| H | -1.88137310 | 2.44763312  | 2.73260535  |
| C | 0.35749556  | 2.97817996  | 4.28153959  |
| H | 0.24201497  | 3.68317637  | 3.45624599  |
| H | -0.16506881 | 3.40714459  | 5.14320320  |
| H | 1.41676749  | 2.93196511  | 4.55349652  |
| C | -0.19013242 | -4.27833497 | 7.14459882  |
| H | -1.00646911 | -3.66051944 | 7.53301616  |
| H | -0.24176262 | -5.24439481 | 7.65836745  |
| H | 0.75370165  | -3.79651431 | 7.41158865  |
| C | -1.76191393 | -4.96627587 | 5.29885687  |
| H | -1.97361900 | -5.88788711 | 5.85377081  |
| H | -2.50585439 | -4.21601048 | 5.58740195  |
| H | -1.87136388 | -5.17217566 | 4.23057675  |
| C | 1.73355515  | -7.00828471 | 2.67112760  |
| H | 1.02625405  | -7.62174213 | 2.10205510  |
| H | 2.74128642  | -7.26469554 | 2.33714297  |
| H | 1.66386441  | -7.32601429 | 3.70996538  |
| C | 2.46431756  | -5.50188985 | 0.02656531  |
| C | 1.92678577  | -6.85982085 | -0.46536699 |
| H | 2.13185627  | -7.65561464 | 0.24897755  |
| H | 0.85056704  | -6.83633333 | -0.64082965 |
| H | 2.42014567  | -7.14285360 | -1.39971804 |
| C | 3.94929444  | -5.64174681 | 0.43917893  |
| H | 4.09819235  | -6.42360577 | 1.18703913  |
| H | 4.54597258  | -5.90658125 | -0.44201164 |
| H | 4.34028270  | -4.71439831 | 0.86569296  |

|   |             |             |             |
|---|-------------|-------------|-------------|
| C | 0.47638333  | 2.51857320  | 1.03298776  |
| H | 1.43020484  | 2.90599145  | 1.39821071  |
| H | 0.42527347  | 2.69426347  | -0.04172712 |
| H | -0.33399638 | 3.08900636  | 1.48327263  |
| O | -1.01392260 | 0.69674672  | 0.93074928  |
| H | -1.20428384 | -0.28560003 | 1.01700797  |
| H | -1.12010918 | 0.71637862  | 5.76309041  |
| C | 0.98823215  | 0.80618194  | 6.16570966  |
| H | 0.94220582  | 1.77173491  | 6.67871988  |
| H | 0.95782866  | 0.01993759  | 6.92612614  |
| H | 1.94376313  | 0.73217165  | 5.64098904  |
| C | 2.08399004  | -5.43077160 | 5.69266974  |
| H | 2.48419382  | -4.41322087 | 5.75060187  |
| H | 2.01219451  | -5.83492254 | 6.70730136  |
| H | 2.81087914  | -6.02463403 | 5.13394850  |
| H | 0.30872255  | -6.45338249 | 4.97479030  |
| H | 3.35970961  | -4.01099725 | -1.28656651 |
| C | 1.74475699  | -4.79325893 | -2.42759327 |
| H | 1.72119246  | -3.93871138 | -3.11215764 |
| H | 2.33589190  | -5.57505925 | -2.91365877 |
| H | 0.72111601  | -5.16129765 | -2.31313425 |
| C | 3.12870661  | 1.43211866  | -0.71928936 |
| H | 2.88701743  | 2.39966827  | -0.27307161 |
| H | 3.88556581  | 0.95590997  | -0.09251674 |
| H | 3.57549496  | 1.62742203  | -1.69834926 |
| H | 1.14244725  | 1.16250294  | -1.45377743 |
| H | -5.19644944 | -0.16012829 | -1.46165951 |
| C | 0.03880700  | -8.95450900 | -3.01747400 |
| C | -1.43718127 | -8.78515346 | -2.60893219 |
| C | -1.58965190 | -7.85298431 | -1.42662845 |
| C | -1.56834811 | -8.33438670 | -0.11065420 |
| C | -1.67074381 | -6.46608801 | -1.60704729 |
| C | -1.61182691 | -7.47221945 | 0.98320441  |
| C | -1.70971245 | -5.58537983 | -0.52704509 |
| C | -1.67501337 | -6.08716698 | 0.78400187  |
| O | -1.71752733 | -5.28714645 | 1.87569124  |
| C | -2.33178100 | 6.38465200  | -4.58246600 |
| C | -2.69659488 | 4.88994104  | -4.68488216 |
| C | -2.75210755 | 4.20257776  | -3.33604435 |
| C | -3.74092562 | 4.56090773  | -2.40524390 |
| C | -1.84652129 | 3.20640773  | -2.96179624 |
| C | -3.80503355 | 3.98054807  | -1.14317224 |
| C | -1.90843162 | 2.59305476  | -1.70521064 |
| C | -2.87514326 | 2.99955204  | -0.77450947 |
| O | -2.96191292 | 2.48754853  | 0.47850874  |
| H | -1.86296164 | -9.76737713 | -2.36800392 |
| H | -2.00768950 | -8.39961731 | -3.46364767 |
| H | -1.51024164 | -9.40740067 | 0.06213113  |
| H | -1.70261921 | -6.06202163 | -2.61759107 |
| H | -1.59912748 | -7.85012442 | 2.00137815  |
| H | -1.78671286 | -4.51404170 | -0.68190532 |
| H | -1.60192094 | -4.34323847 | 1.60396097  |
| H | 0.62572582  | -9.36286594 | -2.18740547 |
| H | -3.67247414 | 4.78936024  | -5.17894736 |
| H | -1.96975730 | 4.37906825  | -5.32881676 |
| H | -1.08254874 | 2.88571448  | -3.66814107 |
| H | -4.47853421 | 5.31175496  | -2.67840671 |
| H | -1.22682465 | 1.79036289  | -1.44117033 |
| H | -4.57008774 | 4.26533068  | -0.42776865 |
| H | -2.28544263 | 1.78521899  | 0.60847328  |
| H | -1.34630070 | 6.51376304  | -4.12199553 |



|   |             |             |             |
|---|-------------|-------------|-------------|
| H | 0.47903513  | -7.98772241 | -3.28578767 |
| H | 0.14369456  | -9.62864290 | -3.87569439 |
| H | -3.05851139 | 6.92405115  | -3.96631799 |
| H | -2.31238359 | 6.85548875  | -5.57154982 |
| C | 7.27035200  | -0.96856400 | 5.68487000  |
| C | 6.04731199  | -1.82456551 | 5.34746582  |
| C | 5.54064491  | -1.61966876 | 3.90421429  |
| C | 4.31889953  | -2.50162682 | 3.67996140  |
| O | 4.42295588  | -3.69429239 | 3.39555335  |
| N | 3.11898570  | -1.90935841 | 3.93212990  |
| H | 5.22891304  | -1.59493455 | 6.04213524  |
| H | 6.27912745  | -2.88824102 | 5.47826660  |
| H | 5.30475473  | -0.56031346 | 3.73563674  |
| H | 6.31289779  | -1.91849711 | 3.18823902  |
| H | 2.97547839  | -0.90989700 | 3.85581699  |
| H | 2.29519000  | -2.48805588 | 3.81522857  |
| H | 7.04596270  | 0.10061306  | 5.58831293  |
| H | 8.10827005  | -1.19282638 | 5.01419572  |
| H | 7.60830124  | -1.14702352 | 6.71149059  |

## TS2

|    |             |             |             |
|----|-------------|-------------|-------------|
| Ni | 0.07135600  | -1.95278400 | 2.40145500  |
| N  | 0.80192200  | -0.57909600 | 1.14878800  |
| C  | 1.63006700  | -0.01875700 | -0.99871200 |
| C  | 1.34268500  | 1.28433400  | -0.15314900 |
| C  | 0.63224400  | 0.67900200  | 1.04616100  |
| N  | -0.36909700 | -0.48744900 | 3.69039200  |
| C  | -0.37147400 | 1.37701100  | 1.98375300  |
| C  | -0.13140000 | 0.94240900  | 3.48820200  |
| C  | -0.99232900 | 1.62982300  | 4.63024800  |
| C  | -0.87988400 | 0.54399300  | 5.75312200  |
| C  | -0.70206500 | -0.72708300 | 4.94596100  |
| N  | 0.03176300  | -3.39747000 | 3.74070200  |
| C  | -0.85220300 | -2.00849000 | 5.53231200  |
| C  | -0.47589500 | -3.23105700 | 4.98219300  |
| C  | -0.60683400 | -4.57506200 | 5.68994300  |
| C  | 0.44870200  | -5.40911500 | 4.90260200  |
| C  | 0.51151500  | -4.68224100 | 3.55748400  |
| N  | 0.82808900  | -3.20930300 | 1.07659600  |
| C  | 1.08191300  | -5.20202900 | 2.41178000  |
| C  | 1.31758400  | -4.40973300 | 1.20923300  |
| C  | 2.05435400  | -3.56491100 | -0.96504600 |
| C  | 1.15802500  | -2.56408900 | -0.19131000 |
| H  | -1.22639800 | -2.02074000 | 6.54944300  |
| H  | 0.20286400  | -2.43327900 | -0.71366300 |
| C  | -3.38544600 | -2.15100600 | 2.75324300  |
| H  | -2.78074200 | -2.11361500 | 3.65465300  |
| H  | -3.93894000 | -3.09154100 | 2.71951800  |
| H  | -4.07901600 | -1.30739600 | 2.73211200  |
| S  | -2.25413200 | -2.06068500 | 1.30899300  |
| S  | -4.24040300 | -2.02586700 | -0.34196100 |
| C  | -3.15903500 | -2.01943800 | -1.82005900 |
| H  | -2.55886900 | -2.93798900 | -1.84622300 |
| H  | -2.44115600 | -1.18546900 | -1.80217000 |
| C  | -4.06665800 | -1.90615300 | -3.03308400 |
| H  | -4.63207600 | -0.97047800 | -3.01337800 |
| H  | -3.46761900 | -1.92469000 | -3.95089600 |
| H  | -4.77649900 | -2.73705300 | -3.07353400 |
| C  | 1.71042500  | -1.12766200 | 0.12365400  |
| C  | 3.09398200  | -1.25591200 | 0.79025900  |

|   |             |             |             |
|---|-------------|-------------|-------------|
| H | 3.02886600  | -1.95396700 | 1.62568700  |
| H | 3.84768900  | -1.61974700 | 0.09035900  |
| H | 3.42981000  | -0.29932100 | 1.19060500  |
| C | 0.39154300  | -0.20850100 | -1.91019400 |
| H | 0.32698400  | 0.63435600  | -2.60639000 |
| H | 0.45454900  | -1.12224700 | -2.50456300 |
| H | -0.56081100 | -0.23900800 | -1.35570300 |
| C | 2.88463900  | 0.05250200  | -1.87340900 |
| H | 3.03224700  | -0.89688300 | -2.39917100 |
| H | 2.78429800  | 0.83653600  | -2.63180600 |
| H | 3.78956400  | 0.25772200  | -1.29833700 |
| O | 1.28740100  | 1.13479400  | 3.72635800  |
| H | 1.47627900  | 2.08169300  | 3.73841200  |
| C | -2.48044900 | 1.73692800  | 4.22958100  |
| H | -2.87136300 | 0.77303700  | 3.89672300  |
| H | -3.06058800 | 2.06129500  | 5.10021700  |
| H | -2.66058600 | 2.45300300  | 3.42789100  |
| C | -0.49824300 | 3.00935000  | 5.09337400  |
| H | -0.68720100 | 3.78623400  | 4.35094900  |
| H | -1.03542100 | 3.30027300  | 6.00195900  |
| H | 0.56672100  | 3.01954100  | 5.34238600  |
| C | -0.38386100 | -4.51595700 | 7.20518600  |
| H | -1.20077900 | -3.97616300 | 7.69457500  |
| H | -0.36617600 | -5.52659800 | 7.62643300  |
| H | 0.55295100  | -4.01806400 | 7.46644200  |
| C | -2.02193900 | -5.12923600 | 5.39071600  |
| H | -2.13219100 | -6.12615500 | 5.83272600  |
| H | -2.79042000 | -4.47926700 | 5.82195700  |
| H | -2.19319300 | -5.20916000 | 4.31313200  |
| C | 1.44745100  | -6.67428900 | 2.40618500  |
| H | 0.82368100  | -7.22377900 | 1.69440100  |
| H | 2.49395100  | -6.85195900 | 2.14622300  |
| H | 1.29001500  | -7.13340100 | 3.38021600  |
| C | 2.26482700  | -4.77952300 | 0.03494200  |
| C | 1.99871500  | -6.13548400 | -0.64853600 |
| H | 2.28214900  | -6.96941300 | -0.01117900 |
| H | 0.95168800  | -6.26594500 | -0.92320700 |
| H | 2.60855200  | -6.21580100 | -1.55368800 |
| C | 3.71993300  | -4.77233100 | 0.57037100  |
| H | 3.91938600  | -5.64358700 | 1.19853900  |
| H | 4.41970100  | -4.80619600 | -0.27275300 |
| H | 3.93818500  | -3.89145900 | 1.17611700  |
| C | -0.32798400 | 2.89791800  | 1.80653600  |
| H | 0.58333200  | 3.33266700  | 2.22255700  |
| H | -0.38140400 | 3.15850900  | 0.74873700  |
| H | -1.18895500 | 3.35604200  | 2.28675200  |
| O | -1.65718700 | 0.98509000  | 1.51398200  |
| H | -1.73006800 | -0.00161400 | 1.48827000  |
| H | -1.82065200 | 0.49550400  | 6.31571800  |
| C | 0.26775700  | 0.70641500  | 6.76706600  |
| H | 0.12824100  | 1.59746200  | 7.38600200  |
| H | 0.30245200  | -0.16285300 | 7.42979000  |
| H | 1.23032900  | 0.78064400  | 6.25688900  |
| C | 1.85618100  | -5.40574800 | 5.53321600  |
| H | 2.20744300  | -4.38189400 | 5.69202000  |
| H | 1.86427900  | -5.93252400 | 6.49209300  |
| H | 2.57745800  | -5.88507900 | 4.86807700  |
| H | 0.09728800  | -6.43935300 | 4.80084100  |
| H | 3.03346300  | -3.11968700 | -1.16320900 |
| C | 1.43410600  | -3.91904400 | -2.32228000 |
| H | 1.32766500  | -3.01751900 | -2.93398000 |

|   |             |             |             |
|---|-------------|-------------|-------------|
| H | 2.05168600  | -4.62009800 | -2.88926300 |
| H | 0.44206800  | -4.36328100 | -2.20268900 |
| C | 2.54247300  | 2.17251000  | 0.22707700  |
| H | 2.20567800  | 3.06213700  | 0.76438500  |
| H | 3.26429600  | 1.65327600  | 0.85981300  |
| H | 3.06182100  | 2.51458700  | -0.67203000 |
| H | 0.64548000  | 1.91997400  | -0.71212400 |
| C | 0.03870600  | -8.95415200 | -3.01768000 |
| C | -1.43354800 | -8.61291400 | -2.69610500 |
| C | -1.62021100 | -7.69190800 | -1.49983500 |
| C | -1.82043400 | -8.20492100 | -0.20901700 |
| C | -1.57375600 | -6.29621400 | -1.63058400 |
| C | -1.99464000 | -7.37190500 | 0.89657700  |
| C | -1.73008600 | -5.44486600 | -0.53196400 |
| C | -1.96778200 | -5.97846500 | 0.74416900  |
| O | -2.20453100 | -5.21263100 | 1.84491900  |
| C | -2.33129100 | 6.38439000  | -4.58285400 |
| C | -2.80879300 | 4.91901800  | -4.47714100 |
| C | -2.95305500 | 4.37400100  | -3.06090800 |
| C | -3.86562100 | 4.93736900  | -2.15208300 |
| C | -2.20191400 | 3.28184100  | -2.60801200 |
| C | -4.02018300 | 4.44033800  | -0.85930200 |
| C | -2.34903900 | 2.76056700  | -1.31634700 |
| C | -3.26486600 | 3.33947100  | -0.42253700 |
| O | -3.47415000 | 2.88945700  | 0.84809400  |
| H | -1.97997000 | -9.54688200 | -2.51711200 |
| H | -1.89104900 | -8.14998200 | -3.57933700 |
| H | -1.85604500 | -9.28283100 | -0.06754100 |
| H | -1.41608400 | -5.86013600 | -2.61496900 |
| H | -2.16976700 | -7.77985100 | 1.88686800  |
| H | -1.67922600 | -4.36906700 | -0.65605300 |
| H | -2.05275500 | -4.26372800 | 1.64402500  |
| H | 0.51339100  | -9.45828200 | -2.16922900 |
| H | -3.77681800 | 4.83512000  | -4.99006200 |
| H | -2.11255200 | 4.27936800  | -5.03273600 |
| H | -1.49092000 | 2.81050300  | -3.28412400 |
| H | -4.47749000 | 5.77970000  | -2.46681700 |
| H | -1.77546100 | 1.89610300  | -0.99972900 |
| H | -4.73460800 | 4.87901700  | -0.17008200 |
| H | -2.90152600 | 2.11800100  | 1.05524000  |
| H | -1.33982300 | 6.50363100  | -4.13358500 |
| H | 0.61311400  | -8.04364600 | -3.22081100 |
| H | 0.11496400  | -9.60927500 | -3.89210000 |
| H | -3.01335200 | 7.06137900  | -4.05869100 |
| H | -2.27572300 | 6.70719700  | -5.62803400 |
| C | 7.27008600  | -0.96845900 | 5.68488800  |
| C | 6.03172200  | -1.82716000 | 5.44536900  |
| C | 4.98970500  | -1.11952600 | 4.57308600  |
| C | 3.86994900  | -2.07823900 | 4.19119300  |
| O | 4.10447100  | -3.18822300 | 3.71427400  |
| N | 2.60795800  | -1.62471500 | 4.40931400  |
| H | 5.57089900  | -2.09218800 | 6.40601000  |
| H | 6.29601100  | -2.77030900 | 4.95698700  |
| H | 4.59402000  | -0.23405200 | 5.08516700  |
| H | 5.46479400  | -0.77477100 | 3.64490000  |
| H | 2.39381300  | -0.63679100 | 4.44834100  |
| H | 1.86483400  | -2.20968400 | 4.05326300  |
| H | 7.01035700  | -0.01976100 | 6.16901700  |
| H | 7.77445000  | -0.73071500 | 4.74076800  |
| H | 7.98945800  | -1.48472300 | 6.32769700  |

Prod

|    |             |             |             |
|----|-------------|-------------|-------------|
| Ni | 0.54045241  | -1.42603482 | 1.66310777  |
| N  | 0.95633361  | -0.12100826 | 0.22399000  |
| C  | 1.48185410  | 0.35585437  | -2.04661989 |
| C  | 1.19986957  | 1.68773614  | -1.23665274 |
| C  | 0.68594431  | 1.11722142  | 0.07790562  |
| N  | 0.10766954  | 0.06194039  | 2.89725673  |
| C  | -0.25264799 | 1.79066225  | 1.10745894  |
| C  | 0.19570981  | 1.48531306  | 2.59489601  |
| C  | -0.59570634 | 2.17732145  | 3.78477836  |
| C  | -0.27466199 | 1.17753274  | 4.94578417  |
| C  | -0.08649162 | -0.12601736 | 4.19226123  |
| N  | 0.68310285  | -2.80859752 | 3.04510867  |
| C  | -0.08150093 | -1.37404812 | 4.85511510  |
| C  | 0.30936867  | -2.60184893 | 4.32372061  |
| C  | 0.33934763  | -3.90906325 | 5.11256418  |
| C  | 1.34224523  | -4.73083641 | 4.24701926  |
| C  | 1.20591372  | -4.07525597 | 2.86787828  |
| N  | 1.10192461  | -2.73543299 | 0.29055885  |
| C  | 1.64809227  | -4.63075416 | 1.68049684  |
| C  | 1.66525698  | -3.90565790 | 0.41535187  |
| C  | 2.03921715  | -3.17076892 | -1.88908873 |
| C  | 1.22111166  | -2.15711539 | -1.04794995 |
| H  | -0.34222407 | -1.35257291 | 5.90768733  |
| H  | 0.19806772  | -2.08567203 | -1.43762750 |
| C  | -2.93610775 | -1.86925145 | 2.58607869  |
| H  | -2.13804180 | -1.71759500 | 3.31515354  |
| H  | -3.38865428 | -2.85129069 | 2.74015009  |
| H  | -3.68570676 | -1.07961802 | 2.66965152  |
| S  | -2.13520250 | -1.81544077 | 0.94276177  |
| S  | -3.91750310 | -2.10158585 | -0.28372177 |
| C  | -3.18601269 | -1.48515436 | -1.85670799 |
| H  | -2.18371749 | -1.91457985 | -1.96650638 |
| H  | -3.09183278 | -0.39625778 | -1.80372579 |
| C  | -4.06665800 | -1.90615300 | -3.03308400 |
| H  | -5.07932048 | -1.50120510 | -2.93928370 |
| H  | -3.63902209 | -1.52604971 | -3.96764093 |
| H  | -4.13652037 | -2.99602618 | -3.10263647 |
| C  | 1.75310356  | -0.68292435 | -0.88625633 |
| C  | 3.21794555  | -0.71881137 | -0.40767763 |
| H  | 3.30195024  | -1.36020416 | 0.47117165  |
| H  | 3.88560624  | -1.10446641 | -1.18085061 |
| H  | 3.56345028  | 0.27602270  | -0.12338698 |
| C  | 0.17519888  | 0.03460306  | -2.80197815 |
| H  | -0.04855712 | 0.83791105  | -3.51315876 |
| H  | 0.24137923  | -0.89626874 | -3.37000347 |
| H  | -0.67237461 | -0.04688087 | -2.11559529 |
| C  | 2.62345093  | 0.46358849  | -3.06333208 |
| H  | 2.77217615  | -0.49765273 | -3.56805873 |
| H  | 2.38691723  | 1.20706049  | -3.83319229 |
| H  | 3.57334509  | 0.74862935  | -2.60624085 |
| O  | 1.60542362  | 1.81826221  | 2.67427058  |
| H  | 1.69420404  | 2.77685879  | 2.59699890  |
| C  | -2.12522685 | 2.14641261  | 3.57305410  |
| H  | -2.47388871 | 1.13469844  | 3.35314196  |
| H  | -2.61799066 | 2.48312093  | 4.49213653  |
| H  | -2.46447962 | 2.79359623  | 2.76422351  |
| C  | -0.16539488 | 3.61450555  | 4.11616854  |
| H  | -0.46995451 | 4.32417554  | 3.34398784  |
| H  | -0.64313903 | 3.93288250  | 5.04925276  |

|   |             |             |             |
|---|-------------|-------------|-------------|
| H | 0.91374493  | 3.70909156  | 4.26823917  |
| C | 0.73577597  | -3.74961126 | 6.58504941  |
| H | -0.05149963 | -3.23324748 | 7.14447217  |
| H | 0.87322142  | -4.73144878 | 7.05171457  |
| H | 1.66117867  | -3.18050308 | 6.70466598  |
| C | -1.06519965 | -4.55462417 | 5.02121538  |
| H | -1.07507779 | -5.51059917 | 5.55835499  |
| H | -1.82048573 | -3.90314266 | 5.47485207  |
| H | -1.34472838 | -4.74165414 | 3.98075241  |
| C | 2.10833321  | -6.07765318 | 1.69778248  |
| H | 1.43429873  | -6.70804651 | 1.10778286  |
| H | 3.11987153  | -6.20554846 | 1.30271154  |
| H | 2.11504804  | -6.48955819 | 2.70531982  |
| C | 2.42764650  | -4.32572018 | -0.86936994 |
| C | 2.07261028  | -5.72734863 | -1.40727858 |
| H | 2.48160032  | -6.51363301 | -0.77464222 |
| H | 0.99527400  | -5.88464940 | -1.48208206 |
| H | 2.51151853  | -5.86792464 | -2.40031702 |
| C | 3.94859951  | -4.26853713 | -0.58421421 |
| H | 4.26000276  | -5.05272094 | 0.10987789  |
| H | 4.50237309  | -4.41218980 | -1.52014557 |
| H | 4.24595286  | -3.31808447 | -0.13780486 |
| C | -0.37194039 | 3.29255976  | 0.83881441  |
| H | 0.54627987  | 3.82283510  | 1.10153470  |
| H | -0.58366258 | 3.47467228  | -0.21547654 |
| H | -1.19750640 | 3.71661615  | 1.40653638  |
| O | -1.55032649 | 1.24715759  | 0.84905930  |
| H | -1.55017839 | 0.26963410  | 0.95920366  |
| H | -1.13982570 | 1.10067405  | 5.61621367  |
| C | 0.96132728  | 1.48800690  | 5.81015869  |
| H | 0.82751692  | 2.41016427  | 6.38461659  |
| H | 1.13167317  | 0.67181344  | 6.51876123  |
| H | 1.85303910  | 1.58954952  | 5.18741802  |
| C | 2.80866157  | -4.61653801 | 4.71005612  |
| H | 3.11647020  | -3.56713613 | 4.75257407  |
| H | 2.95319005  | -5.06695335 | 5.69750576  |
| H | 3.47605694  | -5.11156022 | 4.00142879  |
| H | 1.04113143  | -5.78256342 | 4.23832217  |
| H | 2.96669800  | -2.70731999 | -2.23854800 |
| C | 1.25489942  | -3.61211853 | -3.13276480 |
| H | 1.03450243  | -2.74668972 | -3.76647398 |
| H | 1.81557340  | -4.32274686 | -3.74642774 |
| H | 0.30347688  | -4.08028662 | -2.86107646 |
| C | 2.37814369  | 2.66376545  | -1.05387651 |
| H | 2.05275034  | 3.56564459  | -0.52900991 |
| H | 3.19735320  | 2.22229142  | -0.48196470 |
| H | 2.77150011  | 2.97749459  | -2.02523539 |
| H | 0.39905030  | 2.24360536  | -1.74010588 |
| C | 0.03870600  | -8.95415200 | -3.01768000 |
| C | -1.38811999 | -8.40140255 | -2.83775002 |
| C | -1.48802353 | -7.43271351 | -1.67770249 |
| C | -1.40022031 | -7.89444596 | -0.35551428 |
| C | -1.61539398 | -6.05309775 | -1.87252277 |
| C | -1.42428695 | -7.02076491 | 0.72725699  |
| C | -1.63532762 | -5.16012920 | -0.80021309 |
| C | -1.53395530 | -5.64185926 | 0.51082266  |
| O | -1.55843705 | -4.83128926 | 1.60049159  |
| C | -2.33129100 | 6.38439000  | -4.58285400 |
| C | -3.16959855 | 5.09773624  | -4.70452109 |
| C | -3.35273236 | 4.42005155  | -3.36386260 |
| C | -4.20221324 | 4.98063766  | -2.39761081 |

|   |             |             |             |
|---|-------------|-------------|-------------|
| C | -2.63860487 | 3.27141472  | -3.00981135 |
| C | -4.31682047 | 4.44105571  | -1.12151368 |
| C | -2.74585960 | 2.70894008  | -1.73664907 |
| C | -3.57500346 | 3.30525531  | -0.77383115 |
| O | -3.69158741 | 2.83310989  | 0.49341641  |
| H | -2.08030158 | -9.23991488 | -2.68236424 |
| H | -1.70722953 | -7.90449025 | -3.76217027 |
| H | -1.30746349 | -8.96309430 | -0.17151977 |
| H | -1.69557175 | -5.66227191 | -2.88528691 |
| H | -1.35519459 | -7.38223690 | 1.74889986  |
| H | -1.74293648 | -4.09501876 | -0.97035428 |
| H | -1.44474159 | -3.89911462 | 1.32567455  |
| H | 0.36943230  | -9.47952282 | -2.11533171 |
| H | -4.14833369 | 5.34522410  | -5.13678499 |
| H | -2.68538722 | 4.40876197  | -5.40760038 |
| H | -1.97976532 | 2.80327113  | -3.73970417 |
| H | -4.77820001 | 5.86902782  | -2.65017945 |
| H | -2.17832676 | 1.82367842  | -1.47021399 |
| H | -4.96667785 | 4.88577737  | -0.37394351 |
| H | -3.00952480 | 2.14437647  | 0.64373926  |
| H | -1.33780172 | 6.16211553  | -4.17821725 |
| H | 0.74848789  | -8.14043562 | -3.20295671 |
| H | 0.09214114  | -9.65515294 | -3.85840981 |
| H | -2.81124819 | 7.09825297  | -3.90497173 |
| H | -2.20319616 | 6.87295515  | -5.55571611 |
| C | 7.27008600  | -0.96845900 | 5.68488800  |
| C | 6.05048044  | -1.54589440 | 4.95908694  |
| C | 5.69580954  | -0.77825813 | 3.66920376  |
| C | 4.46524136  | -1.40914901 | 3.02498669  |
| O | 4.53082541  | -2.48924014 | 2.43660786  |
| N | 3.28935015  | -0.76479507 | 3.24092755  |
| H | 5.18000603  | -1.53262769 | 5.62845103  |
| H | 6.22279075  | -2.59496914 | 4.69233741  |
| H | 5.53135677  | 0.28313221  | 3.89743256  |
| H | 6.52501043  | -0.84768876 | 2.95687847  |
| H | 3.22662224  | 0.21539701  | 3.47177960  |
| H | 2.44948339  | -1.17059612 | 2.83764141  |
| H | 7.09624918  | 0.07096123  | 5.98809611  |
| H | 8.15671858  | -0.98161363 | 5.03991488  |
| H | 7.50503802  | -1.54453856 | 6.58644318  |

**React:**

|    |             |             |             |
|----|-------------|-------------|-------------|
| Ni | 0.77611360  | -2.13920995 | 2.14423806  |
| N  | 2.10609735  | -1.06140695 | 1.07639365  |
| C  | 3.61697225  | -0.87064539 | -0.75780117 |
| C  | 3.29095258  | 0.54818607  | -0.13246550 |
| C  | 2.17733301  | 0.18880907  | 0.83786321  |
| N  | 0.18393655  | -0.52746588 | 3.10458815  |
| C  | 1.05735975  | 1.10589568  | 1.39685711  |
| C  | 0.76060425  | 0.80311571  | 2.92978547  |
| C  | -0.22560147 | 1.74786872  | 3.73882935  |
| C  | -0.67903822 | 0.77166127  | 4.87805324  |
| C  | -0.56429940 | -0.57699082 | 4.19168810  |
| N  | -0.18953699 | -3.46438931 | 3.30297961  |
| C  | -1.16770142 | -1.74687691 | 4.72973531  |
| C  | -0.97703194 | -3.06564493 | 4.34417172  |
| C  | -1.63417830 | -4.26909282 | 5.00942696  |
| C  | -0.69687862 | -5.42000110 | 4.52083180  |
| C  | -0.05207049 | -4.81785688 | 3.27380089  |

|   |             |             |             |
|---|-------------|-------------|-------------|
| N | 1.52082938  | -3.57437660 | 1.08658132  |
| C | 0.69006414  | -5.52215414 | 2.29756894  |
| C | 1.42653702  | -4.86308922 | 1.23877769  |
| C | 3.23298397  | -4.50294282 | -0.26275562 |
| C | 2.41678624  | -3.20728630 | -0.02431305 |
| H | -1.80973899 | -1.58129974 | 5.58878875  |
| H | 1.78473219  | -3.00005525 | -0.89492741 |
| C | -2.80790409 | -1.43515187 | 1.31134617  |
| H | -2.26472942 | -1.57133714 | 2.24737451  |
| H | -3.68851487 | -2.08280510 | 1.30360833  |
| H | -3.10368719 | -0.39018821 | 1.19124507  |
| S | -1.66611050 | -1.90700302 | -0.03921419 |
| C | -2.69745386 | -1.40883038 | -1.46580513 |
| H | -2.12990488 | -1.61644113 | -2.37548679 |
| H | -2.89872002 | -0.33765509 | -1.39880241 |
| H | -3.63473312 | -1.97087795 | -1.49146326 |
| S | -5.38216838 | 0.22193607  | -3.57581430 |
| C | -3.70925575 | 0.53241920  | -4.30296408 |
| H | -3.17382987 | -0.41869844 | -4.37980718 |
| H | -3.15862956 | 1.19245499  | -3.63163667 |
| C | -3.86205500 | 1.18075500  | -5.67671700 |
| H | -4.36054883 | 2.15077511  | -5.59212638 |
| H | -2.87456039 | 1.34264313  | -6.12277140 |
| H | -4.44282108 | 0.55255550  | -6.36078913 |
| C | 3.14359737  | -1.86271654 | 0.38554154  |
| C | 4.22774203  | -2.17736278 | 1.43436606  |
| H | 3.80848170  | -2.81271633 | 2.21733702  |
| H | 5.07886328  | -2.69792412 | 0.98882813  |
| H | 4.59513309  | -1.26484689 | 1.90821980  |
| C | 2.73846984  | -1.01163248 | -2.01891919 |
| H | 3.00712328  | -0.23835644 | -2.74757987 |
| H | 2.87583882  | -1.98239101 | -2.50363594 |
| H | 1.67495935  | -0.89301994 | -1.78240092 |
| C | 5.08692657  | -1.02458087 | -1.16481112 |
| H | 5.26644136  | -2.01396388 | -1.59515718 |
| H | 5.35153791  | -0.28407018 | -1.92821991 |
| H | 5.77565163  | -0.89876840 | -0.32712873 |
| O | 2.05569816  | 0.76369905  | 3.58069262  |
| H | 2.35601505  | 1.66853206  | 3.73021382  |
| C | -1.48899210 | 2.10158559  | 2.92935425  |
| H | -1.98835793 | 1.20386641  | 2.56212798  |
| H | -2.19259439 | 2.63656543  | 3.57621037  |
| H | -1.28993366 | 2.74156788  | 2.07034698  |
| C | 0.39728300  | 3.04140694  | 4.28475771  |
| H | 0.63635619  | 3.75202998  | 3.49036626  |
| H | -0.31639943 | 3.53559877  | 4.95249821  |
| H | 1.30089767  | 2.86611829  | 4.87702517  |
| C | -1.75985460 | -4.13837505 | 6.53304528  |
| H | -2.48515779 | -3.36054932 | 6.79484832  |
| H | -2.12165540 | -5.07673486 | 6.96672453  |
| H | -0.80776959 | -3.88488433 | 7.00642597  |
| C | -3.04253385 | -4.45640153 | 4.39394152  |
| H | -3.52652311 | -5.33501761 | 4.83572549  |
| H | -3.67144804 | -3.58194404 | 4.59701067  |
| H | -2.98464014 | -4.60404715 | 3.31299306  |
| C | 0.77970677  | -6.99719116 | 2.34843873  |
| C | 2.21069929  | -5.60823621 | 0.16282645  |
| C | 1.25857251  | -5.97716415 | -0.99548779 |
| H | 0.41925212  | -6.57793925 | -0.64806039 |
| H | 0.83200003  | -5.08542840 | -1.46364165 |
| H | 1.78866694  | -6.54824351 | -1.76508371 |

|   |             |              |             |
|---|-------------|--------------|-------------|
| C | 2.84645311  | -6.85913438  | 0.77788279  |
| H | 3.39901034  | -7.42976684  | 0.01998555  |
| H | 3.57196660  | -6.54927658  | 1.54155623  |
| C | 1.38729428  | 2.57880381   | 1.15515843  |
| H | 2.20346256  | 2.91673744   | 1.79720198  |
| H | 1.68279329  | 2.73331164   | 0.11559119  |
| H | 0.51521511  | 3.20301064   | 1.34242332  |
| O | -0.08946034 | 0.82964885   | 0.58019611  |
| H | -0.27679868 | -0.13355812  | 0.58937200  |
| H | -1.72575819 | 0.97329249   | 5.13984742  |
| C | 0.14258140  | 0.79374234   | 6.18112678  |
| H | 0.04466856  | 1.75366415   | 6.69838605  |
| H | -0.21371292 | 0.01082263   | 6.85740946  |
| H | 1.20021012  | 0.60766014   | 5.98121473  |
| C | 0.41611852  | -5.80115114  | 5.51974142  |
| H | 1.05129505  | -4.94076072  | 5.75836964  |
| H | -0.01064915 | -6.18409023  | 6.45132974  |
| H | 1.04376344  | -6.58364480  | 5.09263419  |
| H | -1.26055427 | -6.31859630  | 4.27523803  |
| H | 4.04179131  | -4.53509957  | 0.47594085  |
| C | 3.83700492  | -4.67411256  | -1.65467236 |
| H | 4.64445706  | -3.95688760  | -1.82890165 |
| H | 4.26205544  | -5.67695706  | -1.77323720 |
| H | 3.09133817  | -4.53377927  | -2.44361132 |
| C | 4.45651698  | 1.29045290   | 0.55035168  |
| H | 4.12871801  | 2.26258284   | 0.92682678  |
| H | 4.86312374  | 0.72718050   | 1.39350077  |
| H | 5.26774384  | 1.47426228   | -0.15966687 |
| H | 2.90908892  | 1.20381127   | -0.92560738 |
| H | -4.99940262 | 0.16683970   | -2.28658699 |
| C | 0.03924500  | -8.95516600  | -3.01651900 |
| C | -1.45603835 | -9.02420472  | -2.64935866 |
| C | -1.82998383 | -7.93921829  | -1.66363022 |
| C | -1.82653316 | -8.17342393  | -0.28151944 |
| C | -2.08246197 | -6.63437399  | -2.10423769 |
| C | -2.03392947 | -7.14377647  | 0.63547819  |
| C | -2.29536081 | -5.59334693  | -1.20356051 |
| C | -2.24804063 | -5.84253388  | 0.17362614  |
| O | -2.41132961 | -4.84432761  | 1.09092488  |
| C | -2.33141000 | 6.38400300   | -4.58291200 |
| C | -2.43580907 | 4.87656068   | -4.88446605 |
| C | -2.44983787 | 4.03159975   | -3.62722506 |
| C | -3.62549000 | 3.88219796   | -2.87639032 |
| C | -1.29180862 | 3.40628144   | -3.15036014 |
| C | -3.65060459 | 3.14400765   | -1.69635899 |
| C | -1.29721285 | 2.65461453   | -1.97400520 |
| C | -2.48220492 | 2.52572530   | -1.23753751 |
| O | -2.55236068 | 1.79309951   | -0.08836954 |
| H | -1.68451007 | -10.01059911 | -2.22753182 |
| H | -2.05800255 | -8.92625927  | -3.56203925 |
| H | -1.63131109 | -9.17675393  | 0.09143051  |
| H | -2.10027668 | -6.42525460  | -3.17225919 |
| H | -1.97890211 | -7.32633004  | 1.70287908  |
| H | -2.48516994 | -4.58343847  | -1.55721116 |
| H | -2.11874806 | -4.00166184  | 0.69283109  |
| H | 0.66254455  | -9.07797921  | -2.12393662 |
| H | -3.34849670 | 4.68681947   | -5.46418448 |
| H | -1.59656763 | 4.57327094   | -5.52270987 |
| H | -0.36556224 | 3.49798696   | -3.71444861 |
| H | -4.54489936 | 4.34417616   | -3.22906936 |
| H | -0.39900250 | 2.15468205   | -1.62223679 |



|   |             |             |             |
|---|-------------|-------------|-------------|
| H | -4.56609266 | 3.02388587  | -1.12590088 |
| H | -1.65017185 | 1.51816942  | 0.18263855  |
| H | -1.41149674 | 6.60646720  | -4.03128638 |
| H | 0.28445088  | -7.98285389 | -3.45752909 |
| H | 0.31304516  | -9.73623020 | -3.73545453 |
| H | -3.17452895 | 6.71571374  | -3.96737305 |
| H | -2.32918566 | 6.97520192  | -5.50556908 |
| C | 1.76508554  | -7.72928978 | 1.42480869  |
| H | 1.15144129  | -8.22554768 | 0.66207373  |
| H | 2.20129059  | -8.53217880 | 2.02734728  |
| O | 0.09447368  | -7.70360126 | 3.09185610  |
| C | 7.27051500  | -0.96889900 | 5.68434700  |
| C | 6.24988843  | -1.97206218 | 5.13569281  |
| C | 4.80890426  | -1.47139801 | 5.24897138  |
| C | 3.77633238  | -2.54672734 | 4.89693318  |
| O | 4.07545634  | -3.72951447 | 4.76122847  |
| N | 2.49250564  | -2.09320699 | 4.79936002  |
| H | 6.32517609  | -2.92648773 | 5.66669491  |
| H | 6.46809543  | -2.20015223 | 4.08462482  |
| H | 4.60040622  | -1.13815823 | 6.27596172  |
| H | 4.64169594  | -0.59207493 | 4.61011508  |
| H | 2.32112014  | -1.12563580 | 4.55023017  |
| H | 1.82488082  | -2.74930830 | 4.41045199  |
| H | 7.09107037  | -0.76272819 | 6.74654019  |
| H | 7.22045991  | -0.01117236 | 5.15110475  |
| H | 8.29353018  | -1.34851120 | 5.58816439  |

#### TS1<sub>f</sub>

|    |             |             |             |
|----|-------------|-------------|-------------|
| Ni | 0.71830100  | -2.08991100 | 2.38511400  |
| N  | 2.17419200  | -1.01993700 | 1.42393300  |
| C  | 3.47979600  | -0.87301900 | -0.56217400 |
| C  | 3.18121600  | 0.56179700  | 0.03104800  |
| C  | 2.18867400  | 0.22088600  | 1.13122300  |
| N  | 0.20587300  | -0.46482900 | 3.41263900  |
| C  | 1.09829000  | 1.16831900  | 1.69275800  |
| C  | 0.77787600  | 0.86535800  | 3.21981000  |
| C  | -0.23385700 | 1.81596300  | 3.99002000  |
| C  | -0.70458600 | 0.85571800  | 5.13268300  |
| C  | -0.56700000 | -0.49914900 | 4.47258300  |
| N  | -0.12971800 | -3.39188500 | 3.66865100  |
| C  | -1.19605500 | -1.65764700 | 5.00957300  |
| C  | -0.98834900 | -2.97477200 | 4.64967500  |
| C  | -1.69915800 | -4.16347100 | 5.27767400  |
| C  | -0.72583800 | -5.31983500 | 4.89237300  |
| C  | 0.01383100  | -4.74614900 | 3.69118400  |
| N  | 1.67993700  | -3.55808100 | 1.54592900  |
| C  | 0.83789600  | -5.46910100 | 2.80782800  |
| C  | 1.61467400  | -4.83545600 | 1.76318700  |
| C  | 3.46103600  | -4.48742500 | 0.31563400  |
| C  | 2.56547600  | -3.22571800 | 0.41937300  |
| H  | -1.88254300 | -1.47662600 | 5.82859900  |
| H  | 1.93213500  | -3.15258600 | -0.46987000 |
| C  | -2.48537900 | -1.41392200 | 1.53673700  |
| H  | -2.27988100 | -1.33687700 | 2.60371700  |
| H  | -3.25261300 | -2.17553100 | 1.38323800  |
| H  | -2.85100600 | -0.45624900 | 1.16012200  |
| S  | -0.95146900 | -1.90485600 | 0.63237200  |
| C  | -2.65360500 | -1.37605700 | -1.62147500 |
| H  | -1.98282300 | -1.61846700 | -2.43432000 |
| H  | -2.67257000 | -0.37221200 | -1.21908400 |

|   |             |             |             |
|---|-------------|-------------|-------------|
| H | -3.32362500 | -2.13232300 | -1.23819900 |
| S | -5.29442700 | 0.17117800  | -3.53661900 |
| C | -3.65647900 | 0.49978500  | -4.32693800 |
| H | -3.13664000 | -0.45402500 | -4.44764000 |
| H | -3.06948200 | 1.13565700  | -3.66092300 |
| C | -3.86205500 | 1.18075500  | -5.67671700 |
| H | -4.37570500 | 2.13994500  | -5.55655400 |
| H | -2.89236300 | 1.37961200  | -6.14541400 |
| H | -4.45094900 | 0.55769100  | -6.35692900 |
| C | 3.19968300  | -1.80741800 | 0.68663500  |
| C | 4.39792000  | -1.95184700 | 1.64084700  |
| H | 4.09361500  | -2.51065200 | 2.52669200  |
| H | 5.22876800  | -2.47997100 | 1.16908300  |
| H | 4.75590400  | -0.97605000 | 1.97102100  |
| C | 2.44692300  | -1.11379800 | -1.68462100 |
| H | 2.56485000  | -0.35072300 | -2.46125000 |
| H | 2.58620700  | -2.08693000 | -2.16378500 |
| H | 1.41820300  | -1.05915800 | -1.31262300 |
| C | 4.88579600  | -1.00385800 | -1.15607600 |
| H | 5.03130300  | -2.00239200 | -1.57498800 |
| H | 5.02062300  | -0.28780300 | -1.97418300 |
| H | 5.67787400  | -0.82730700 | -0.42593900 |
| O | 2.05432600  | 0.82078800  | 3.90381100  |
| H | 2.39817500  | 1.71945900  | 3.98269000  |
| C | -1.47807100 | 2.14714100  | 3.14006300  |
| H | -1.95358200 | 1.24346200  | 2.75570300  |
| H | -2.20621000 | 2.67608300  | 3.76373700  |
| H | -1.25902400 | 2.78431900  | 2.28404600  |
| C | 0.36692600  | 3.11694900  | 4.54211500  |
| H | 0.60670600  | 3.83262300  | 3.75371200  |
| H | -0.36235800 | 3.60013400  | 5.20023300  |
| H | 1.26572000  | 2.94946100  | 5.14281300  |
| C | -1.96488600 | -4.01485700 | 6.78063300  |
| H | -2.70336100 | -3.22843400 | 6.96622200  |
| H | -2.37667200 | -4.94541900 | 7.18366100  |
| H | -1.05979600 | -3.76824000 | 7.34118700  |
| C | -3.04510800 | -4.35106100 | 4.53238000  |
| H | -3.53592000 | -5.26387800 | 4.88611200  |
| H | -3.71197700 | -3.50406200 | 4.72551700  |
| H | -2.88698400 | -4.43264800 | 3.45510400  |
| C | 0.94828700  | -6.94013500 | 2.91577200  |
| C | 2.47529500  | -5.61213600 | 0.77249100  |
| C | 1.60459100  | -6.11462200 | -0.40043000 |
| H | 0.78257300  | -6.74185100 | -0.05833500 |
| H | 1.15139300  | -5.28791700 | -0.95187700 |
| H | 2.21306200  | -6.69991500 | -1.09712500 |
| C | 3.13787700  | -6.77690800 | 1.51589000  |
| H | 3.76789100  | -7.36400200 | 0.83636800  |
| H | 3.79119700  | -6.37100700 | 2.29807400  |
| C | 1.49115700  | 2.63586200  | 1.49621200  |
| H | 2.32032000  | 2.93756300  | 2.14049000  |
| H | 1.77897600  | 2.80753200  | 0.45847100  |
| H | 0.63625500  | 3.27715100  | 1.69996300  |
| O | -0.02021000 | 0.96688400  | 0.83648800  |
| H | -0.24270500 | -0.00994200 | 0.76666500  |
| H | -1.75768300 | 1.04939100  | 5.37016200  |
| C | 0.09249500  | 0.89126900  | 6.45108400  |
| H | -0.03272700 | 1.84954100  | 6.96306300  |
| H | -0.26240600 | 0.10363000  | 7.12204000  |
| H | 1.15655000  | 0.72768500  | 6.26732500  |
| C | 0.30042700  | -5.67771700 | 5.98813600  |

|   |             |             |             |
|---|-------------|-------------|-------------|
| H | 0.88861800  | -4.80168300 | 6.28331100  |
| H | -0.20366600 | -6.06749600 | 6.87632600  |
| H | 0.98123800  | -6.44747900 | 5.62554800  |
| H | -1.26359800 | -6.22435300 | 4.61324100  |
| H | 4.22551300  | -4.42264500 | 1.09713500  |
| C | 4.14823700  | -4.72461700 | -1.02670400 |
| H | 4.97006300  | -4.02004200 | -1.18000500 |
| H | 4.57552200  | -5.73193100 | -1.07008300 |
| H | 3.45384500  | -4.62046800 | -1.86612800 |
| C | 4.39627300  | 1.38318600  | 0.50685900  |
| H | 4.09274400  | 2.37531200  | 0.84562400  |
| H | 4.93127900  | 0.90089200  | 1.32731200  |
| H | 5.10024400  | 1.52445200  | -0.31685500 |
| H | 2.66998700  | 1.15929800  | -0.73384100 |
| H | -4.79159500 | -0.45555300 | -2.45045700 |
| C | 0.03924500  | -8.95516600 | -3.01651900 |
| C | -1.43405800 | -8.74112000 | -2.62594400 |
| C | -1.60239800 | -7.68389800 | -1.55657400 |
| C | -1.66602600 | -8.02356900 | -0.19770000 |
| C | -1.65198200 | -6.32410200 | -1.89186100 |
| C | -1.76692800 | -7.04939100 | 0.79491400  |
| C | -1.76012800 | -5.33420900 | -0.91662600 |
| C | -1.81252900 | -5.69647100 | 0.43671500  |
| O | -1.91478500 | -4.77264400 | 1.42984100  |
| C | -2.33141000 | 6.38400300  | -4.58291200 |
| C | -2.33684700 | 4.86545900  | -4.84834000 |
| C | -2.35473200 | 4.03611600  | -3.58067900 |
| C | -3.55212900 | 3.81701300  | -2.88205600 |
| C | -1.18443800 | 3.48053900  | -3.04883800 |
| C | -3.58409400 | 3.09046300  | -1.69566300 |
| C | -1.19554900 | 2.74448700  | -1.86147500 |
| C | -2.40009100 | 2.55826700  | -1.17006900 |
| O | -2.47822000 | 1.86233600  | 0.00088800  |
| H | -1.85756600 | -9.69075000 | -2.27734000 |
| H | -2.00505300 | -8.45716700 | -3.51889200 |
| H | -1.62694100 | -9.07106900 | 0.09328500  |
| H | -1.61149700 | -6.03214700 | -2.93935400 |
| H | -1.77941600 | -7.31673900 | 1.84621500  |
| H | -1.80039300 | -4.28334000 | -1.18742200 |
| H | -1.54739400 | -3.90910200 | 1.12351100  |
| H | 0.62739400  | -9.26989600 | -2.14775500 |
| H | -3.21115600 | 4.61291000  | -5.46161900 |
| H | -1.45652400 | 4.60071900  | -5.44685700 |
| H | -0.24243400 | 3.61857500  | -3.57560700 |
| H | -4.48275600 | 4.21305400  | -3.28142500 |
| H | -0.28456500 | 2.30343700  | -1.46661700 |
| H | -4.51621700 | 2.91085900  | -1.17141300 |
| H | -1.57911600 | 1.62991000  | 0.30997700  |
| H | -1.44779000 | 6.67373400  | -4.00418700 |
| H | 0.47907400  | -8.02501000 | -3.39225900 |
| H | 0.14080500  | -9.72042900 | -3.79433800 |
| H | -3.21488600 | 6.68075900  | -4.00826900 |
| H | -2.32813700 | 6.94965000  | -5.52118600 |
| C | 2.06672800  | -7.66712700 | 2.15466600  |
| H | 1.56597900  | -8.28657700 | 1.40151700  |
| H | 2.50666800  | -8.36805100 | 2.87075800  |
| O | 0.19070600  | -7.63685000 | 3.59175500  |
| C | 7.27051500  | -0.96889900 | 5.68434700  |
| C | 6.25565300  | -1.97599100 | 5.13487000  |
| C | 4.80903800  | -1.50835900 | 5.29921700  |
| C | 3.79060200  | -2.59783300 | 4.96371000  |

|   |            |             |            |
|---|------------|-------------|------------|
| O | 4.11648400 | -3.75260400 | 4.70481700 |
| N | 2.48164600 | -2.20028300 | 5.00922700 |
| H | 6.36637100 | -2.94267600 | 5.63571000 |
| H | 6.45051000 | -2.17024800 | 4.07317800 |
| H | 4.62408400 | -1.18606900 | 6.33337000 |
| H | 4.59949700 | -0.63073000 | 4.67155300 |
| H | 2.23407300 | -1.22610200 | 4.88265100 |
| H | 1.82229500 | -2.88049200 | 4.65706900 |
| H | 7.11372900 | -0.79440200 | 6.75513800 |
| H | 7.18829600 | 0.00103300  | 5.17813200 |
| H | 8.29648000 | -1.32601500 | 5.55187100 |

**Int1:**

|    |             |             |             |
|----|-------------|-------------|-------------|
| Ni | 0.66537879  | -2.25319478 | 2.31641645  |
| N  | 2.04592738  | -1.13981167 | 1.30240348  |
| C  | 3.58165280  | -0.93117670 | -0.50404373 |
| C  | 3.18705329  | 0.48618175  | 0.08315083  |
| C  | 2.07269441  | 0.10799845  | 1.04518967  |
| N  | 0.16915051  | -0.62307943 | 3.35926006  |
| C  | 0.92430100  | 1.00989277  | 1.57513804  |
| C  | 0.66142974  | 0.73154227  | 3.11867951  |
| C  | -0.36627021 | 1.63907849  | 3.91252944  |
| C  | -0.74410402 | 0.67782652  | 5.09143734  |
| C  | -0.55399162 | -0.68378612 | 4.45311947  |
| N  | -0.00215964 | -3.57496260 | 3.67636229  |
| C  | -1.07956934 | -1.86902297 | 5.04401858  |
| C  | -0.81694492 | -3.18355922 | 4.70136203  |
| C  | -1.41005072 | -4.39580039 | 5.40243338  |
| C  | -0.42835113 | -5.51924619 | 4.93752574  |
| C  | 0.19165873  | -4.92504451 | 3.67889373  |
| N  | 1.65351169  | -3.68688282 | 1.42797678  |
| C  | 0.94888980  | -5.62606223 | 2.71835880  |
| C  | 1.63167930  | -4.96754917 | 1.62690941  |
| C  | 3.38242051  | -4.55470189 | 0.07188248  |
| C  | 2.49663378  | -3.29946928 | 0.28730230  |
| H  | -1.72759410 | -1.71004669 | 5.89882229  |
| H  | 1.83292125  | -3.15153103 | -0.57161120 |
| C  | -2.64068969 | -1.62422132 | 1.64134406  |
| H  | -2.41908719 | -1.48877955 | 2.70095075  |
| H  | -3.42554126 | -2.37939407 | 1.54748713  |
| H  | -3.00197314 | -0.68428997 | 1.21568654  |
| S  | -1.13553086 | -2.19182588 | 0.73679663  |
| C  | -3.60640378 | -1.86842019 | -1.77580615 |
| H  | -2.69297685 | -2.11891899 | -2.32038979 |
| H  | -3.50043203 | -0.86808663 | -1.34890665 |
| H  | -3.74606775 | -2.58993855 | -0.96881504 |
| S  | -5.58878315 | 0.53675639  | -3.63116927 |
| C  | -3.87704735 | 0.58548333  | -4.25837194 |
| H  | -3.47559973 | -0.43164399 | -4.27310778 |
| H  | -3.27168864 | 1.20360145  | -3.59117148 |
| C  | -3.86205500 | 1.18075500  | -5.67671700 |
| H  | -4.24417131 | 2.20597605  | -5.67617746 |
| H  | -2.82976479 | 1.20686088  | -6.04304099 |
| H  | -4.46084271 | 0.58469396  | -6.37209134 |
| C  | 3.14152819  | -1.90951872 | 0.65910498  |
| C  | 4.22009500  | -2.13282063 | 1.73630075  |
| H  | 3.83057585  | -2.78351701 | 2.52185162  |
| H  | 5.11055551  | -2.60462998 | 1.31507464  |
| H  | 4.51915281  | -1.19126893 | 2.19967147  |
| C  | 2.72081310  | -1.14900827 | -1.76644670 |

|   |             |             |             |
|---|-------------|-------------|-------------|
| H | 2.95738028  | -0.38225088 | -2.51255026 |
| H | 2.91349974  | -2.12297203 | -2.22532157 |
| H | 1.65029207  | -1.08085494 | -1.54359036 |
| C | 5.06145496  | -1.03096610 | -0.89180972 |
| H | 5.28894137  | -2.02243791 | -1.29354029 |
| H | 5.29983897  | -0.30102460 | -1.67344004 |
| H | 5.73630339  | -0.85117588 | -0.05254611 |
| O | 1.97107328  | 0.78018558  | 3.74593207  |
| H | 2.20134089  | 1.70186397  | 3.91452509  |
| C | -1.65479861 | 1.88984060  | 3.10214322  |
| H | -2.09780034 | 0.95626900  | 2.75223781  |
| H | -2.38773662 | 2.39431731  | 3.74127483  |
| H | -1.49915706 | 2.51830707  | 2.22698799  |
| C | 0.18489586  | 2.98384419  | 4.40947487  |
| H | 0.36952325  | 3.68152309  | 3.59054835  |
| H | -0.55025671 | 3.45391602  | 5.07085759  |
| H | 1.10463646  | 2.88552340  | 4.99583288  |
| C | -1.52972717 | -4.22655376 | 6.92274410  |
| H | -2.28545909 | -3.47326980 | 7.16852059  |
| H | -1.85004856 | -5.16682853 | 7.38303795  |
| H | -0.58555941 | -3.92221792 | 7.38196347  |
| C | -2.81435516 | -4.65356515 | 4.79973378  |
| H | -3.25689859 | -5.53913691 | 5.26929924  |
| H | -3.47536275 | -3.79985232 | 4.98543304  |
| H | -2.75649200 | -4.82636580 | 3.72267736  |
| C | 1.09115794  | -7.09780760 | 2.79540013  |
| C | 2.43351394  | -5.70233079 | 0.55762224  |
| C | 1.48099297  | -6.15491452 | -0.57224057 |
| H | 0.68004931  | -6.79039194 | -0.19804533 |
| H | 0.99726935  | -5.30368853 | -1.05764842 |
| H | 2.03371883  | -6.71693496 | -1.33255643 |
| C | 3.13947555  | -6.90000405 | 1.20190661  |
| H | 3.70962439  | -7.46453495 | 0.45323274  |
| H | 3.85817174  | -6.53308682 | 1.94659742  |
| C | 1.22972375  | 2.48877908  | 1.32306506  |
| H | 2.02576844  | 2.86196589  | 1.97067510  |
| H | 1.53077537  | 2.63684490  | 0.28450823  |
| H | 0.33405337  | 3.08613921  | 1.48567321  |
| O | -0.19743539 | 0.71085315  | 0.75647476  |
| H | -0.39231538 | -0.27263697 | 0.74474749  |
| H | -1.79840072 | 0.81938866  | 5.35788489  |
| C | 0.08970493  | 0.78951789  | 6.38264630  |
| H | -0.05733533 | 1.76037542  | 6.86552074  |
| H | -0.21421309 | 0.01340379  | 7.09152158  |
| H | 1.15433451  | 0.65654023  | 6.17676259  |
| C | 0.70112830  | -5.84460626 | 5.93909684  |
| H | 1.33465067  | -4.97243749 | 6.13422657  |
| H | 0.28740231  | -6.19679638 | 6.88800948  |
| H | 1.32928833  | -6.63772335 | 5.53414548  |
| H | -0.95828691 | -6.44112994 | 4.70285286  |
| H | 4.21010740  | -4.51510655 | 0.78943530  |
| C | 3.95936259  | -4.73717147 | -1.33027494 |
| H | 4.72086221  | -3.98277784 | -1.54782845 |
| H | 4.43626871  | -5.71839128 | -1.42901088 |
| H | 3.18732015  | -4.66321963 | -2.10207079 |
| C | 4.31213251  | 1.29653112  | 0.75771881  |
| H | 3.94358043  | 2.26713391  | 1.09651844  |
| H | 4.73163931  | 0.77888206  | 1.62342671  |
| H | 5.12331876  | 1.48673496  | 0.04978990  |
| H | 2.78124211  | 1.10473901  | -0.72708631 |
| H | -4.46647091 | -1.89849686 | -2.44967899 |

|   |             |             |             |
|---|-------------|-------------|-------------|
| C | 0.03924500  | -8.95516600 | -3.01651900 |
| C | -1.43415030 | -8.91056596 | -2.56358187 |
| C | -1.66468717 | -7.89654024 | -1.46202390 |
| C | -1.63604398 | -8.26419038 | -0.10935417 |
| C | -1.84096234 | -6.53922142 | -1.76250343 |
| C | -1.75055723 | -7.31748498 | 0.90939414  |
| C | -1.96655066 | -5.57841700 | -0.76122286 |
| C | -1.90277775 | -5.96413170 | 0.58555721  |
| O | -1.98946054 | -5.06172244 | 1.60075496  |
| C | -2.33141000 | 6.38400300  | -4.58291200 |
| C | -2.33199379 | 4.86425390  | -4.84361950 |
| C | -2.37355775 | 4.03754277  | -3.57256759 |
| C | -3.55836838 | 3.93134584  | -2.82720520 |
| C | -1.24443750 | 3.36727784  | -3.08745633 |
| C | -3.61920386 | 3.19604111  | -1.64764196 |
| C | -1.28564256 | 2.61894647  | -1.90829763 |
| C | -2.47836045 | 2.53350296  | -1.17671755 |
| O | -2.58482178 | 1.82201066  | -0.02153828 |
| H | -1.73926067 | -9.90744952 | -2.22188363 |
| H | -2.06770495 | -8.67048269 | -3.42725133 |
| H | -1.50484693 | -9.31149117 | 0.15627721  |
| H | -1.87901526 | -6.22450326 | -2.80398922 |
| H | -1.68485541 | -7.60479242 | 1.95400967  |
| H | -2.09860597 | -4.52901612 | -1.00728828 |
| H | -1.66990605 | -4.17703084 | 1.29250259  |
| H | 0.69293054  | -9.22142471 | -2.17819817 |
| H | -3.19740739 | 4.61165367  | -5.47119689 |
| H | -1.44253203 | 4.59518351  | -5.42686943 |
| H | -0.31194706 | 3.41988067  | -3.64664536 |
| H | -4.45964356 | 4.42276446  | -3.18744050 |
| H | -0.40868692 | 2.08376721  | -1.55333713 |
| H | -4.54530430 | 3.10095639  | -1.09046666 |
| H | -1.71071091 | 1.46069217  | 0.23275007  |
| H | -1.45628735 | 6.67619501  | -3.99223077 |
| H | 0.35996713  | -7.97460910 | -3.38580970 |
| H | 0.19175413  | -9.68902204 | -3.81646143 |
| H | -3.22352373 | 6.68266715  | -4.02198200 |
| H | -2.31508069 | 6.94789605  | -5.52239453 |
| C | 2.10833742  | -7.80482220 | 1.88617811  |
| H | 1.51817345  | -8.35771708 | 1.14495998  |
| H | 2.59135788  | -8.56312609 | 2.51026822  |
| O | 0.43070721  | -7.80973188 | 3.55226525  |
| C | 7.27051500  | -0.96889900 | 5.68434700  |
| C | 6.20730488  | -1.96067817 | 5.20413240  |
| C | 4.78810504  | -1.43747486 | 5.42477372  |
| C | 3.71305769  | -2.49045489 | 5.15464631  |
| O | 3.94839431  | -3.69566118 | 5.14428741  |
| N | 2.46096712  | -1.98556539 | 4.97882320  |
| H | 6.30552189  | -2.91838506 | 5.72519522  |
| H | 6.34825304  | -2.18251574 | 4.13819351  |
| H | 4.66552849  | -1.11447029 | 6.46899325  |
| H | 4.59296858  | -0.54732790 | 4.81012030  |
| H | 2.31499281  | -1.02081091 | 4.70760612  |
| H | 1.73702241  | -2.64681797 | 4.73086477  |
| H | 7.16597387  | -0.76647856 | 6.75712496  |
| H | 7.19060927  | -0.00864662 | 5.15952935  |
| H | 8.28198170  | -1.35446530 | 5.51678979  |

**ReactNoF**

|   |             |            |             |
|---|-------------|------------|-------------|
| C | -0.08960200 | 7.77957500 | -1.92406600 |
|---|-------------|------------|-------------|

|    |             |             |             |
|----|-------------|-------------|-------------|
| C  | 0.10433200  | 6.73920800  | -0.84291300 |
| C  | -0.07803400 | 7.05853900  | 0.51178200  |
| C  | 0.42932800  | 5.41458900  | -1.15284900 |
| C  | 0.03285100  | 6.09784200  | 1.51266400  |
| C  | 0.54098700  | 4.43565400  | -0.16278200 |
| C  | 0.33112400  | 4.77002900  | 1.18076900  |
| O  | 0.41309200  | 3.86468100  | 2.19625800  |
| C  | 7.45009600  | -2.64303900 | -1.38324300 |
| C  | 5.97973800  | -2.37830200 | -1.19427800 |
| C  | 5.14495900  | -3.38570400 | -0.69005000 |
| C  | 5.40308000  | -1.14821900 | -1.52299700 |
| C  | 3.78102000  | -3.18570100 | -0.51722700 |
| C  | 4.03342700  | -0.92556800 | -1.36239400 |
| C  | 3.22884300  | -1.94651900 | -0.85608400 |
| O  | 1.86963800  | -1.79387700 | -0.70560600 |
| C  | -5.86031900 | -2.55887300 | -0.49882500 |
| C  | -5.30495300 | -1.34758400 | -1.22585900 |
| O  | -4.69936300 | -1.43330200 | -2.28956300 |
| N  | -5.54185800 | -0.15093500 | -0.60256300 |
| Ni | -1.94009400 | -0.55377300 | 0.09731100  |
| N  | -1.05846400 | -1.29129000 | -1.73102400 |
| C  | -1.05443800 | 0.87346000  | -2.84523500 |
| C  | -1.01041100 | -0.62075400 | -2.82784700 |
| C  | -1.04993400 | -1.46876200 | -4.08391800 |
| C  | -1.54500700 | -2.79607900 | -3.48351000 |
| C  | -1.00817700 | -2.73352900 | -2.08497200 |
| N  | -1.73708300 | -2.40102600 | 0.91203600  |
| C  | -1.80648100 | -3.64281900 | -1.19981900 |
| C  | -1.32218400 | -3.64384500 | 0.22357400  |
| C  | -1.88077700 | -4.84997400 | 1.00953800  |
| C  | -2.08715800 | -4.20384000 | 2.36036700  |
| C  | -2.12654800 | -2.72619600 | 2.12413700  |
| N  | 0.11948500  | -3.85990200 | 0.34033200  |
| C  | 0.49975800  | -5.11567400 | 0.70768700  |
| O  | 1.64947400  | -5.52790400 | 0.80467200  |
| C  | -0.78340400 | -5.92119100 | 0.95645800  |
| N  | -2.73221100 | 0.16887200  | 1.87742500  |
| C  | -2.52800100 | -1.86608200 | 3.17386300  |
| C  | -2.78927500 | -0.52570600 | 3.04730100  |
| C  | -3.23353000 | 0.35371400  | 4.20223800  |
| C  | -3.84315600 | 1.54967900  | 3.46525800  |
| C  | -3.30667500 | 1.39106900  | 2.04715400  |
| N  | -2.48934400 | 1.16378700  | -0.83239800 |
| C  | -3.48274400 | 2.33663300  | 1.06253200  |
| C  | -3.12591800 | 2.19274100  | -0.30541700 |
| C  | -3.57428300 | 3.21942500  | -1.35395900 |
| C  | -2.68680100 | 2.82218700  | -2.54330700 |
| C  | -2.40979100 | 1.34068100  | -2.29803700 |
| H  | 0.39334000  | 8.72964900  | -1.66456000 |
| H  | 0.32790500  | 7.44492200  | -2.87996700 |
| H  | -0.32221100 | 8.08248100  | 0.78946700  |
| H  | 0.59207700  | 5.13321100  | -2.19205700 |
| H  | -0.11801500 | 6.35360100  | 2.55754500  |
| H  | 0.77761400  | 3.40979000  | -0.43406500 |
| H  | 0.49449400  | 2.96067500  | 1.82849300  |
| H  | 7.89131400  | -3.11339600 | -0.49597300 |
| H  | 8.01159400  | -1.72418700 | -1.58377300 |
| H  | 5.57377800  | -4.34865100 | -0.41957800 |
| H  | 6.02512900  | -0.35382400 | -1.93144300 |
| H  | 3.14921100  | -3.97242200 | -0.10935100 |
| H  | 3.59075500  | 0.02808900  | -1.64133400 |

|   |             |             |             |
|---|-------------|-------------|-------------|
| H | 1.63791400  | -0.86591100 | -0.49097000 |
| H | -5.10715600 | -2.91837200 | 0.21375600  |
| H | -6.06089600 | -3.35480000 | -1.21923000 |
| H | -5.76578800 | -0.16344600 | 0.38378800  |
| H | -4.92245100 | 0.60404700  | -0.86900800 |
| H | -0.25817400 | 1.29970700  | -2.22287900 |
| H | -0.92367400 | 1.24297100  | -3.86923500 |
| H | -1.20856800 | -3.67925300 | -4.03838500 |
| H | 0.04867600  | -3.02712600 | -2.05625500 |
| H | -2.86414900 | -3.35837400 | -1.22459000 |
| H | -1.72372400 | -4.65949700 | -1.60960500 |
| H | -1.25499400 | -4.43971400 | 3.04318200  |
| H | -0.69245800 | -6.52055600 | 1.86731500  |
| H | -0.92386500 | -6.61939700 | 0.12172700  |
| H | -2.69275100 | -2.32591700 | 4.14412000  |
| H | -3.92695600 | -0.15649200 | 4.87819000  |
| H | -3.57980400 | 2.52051500  | 3.89791400  |
| H | -4.62696700 | 2.99525500  | -1.60000900 |
| H | -1.74737100 | 3.39102000  | -2.49722000 |
| H | -3.19784200 | 0.72140300  | -2.75428100 |
| H | -6.77597100 | -2.33092700 | 0.05714100  |
| H | -2.35995200 | 0.65294500  | 4.79770600  |
| H | -4.94081000 | 1.49487800  | 3.45421100  |
| H | -3.14921900 | 3.01487700  | -3.51753200 |
| H | -1.70264400 | -1.03943400 | -4.85266400 |
| H | -0.04194900 | -1.55057600 | -4.52060000 |
| H | -2.64089900 | -2.79393200 | -3.46137900 |
| H | -2.99081600 | -4.55249400 | 2.87766700  |
| H | -2.82962000 | -5.18641900 | 0.57958100  |
| H | 7.63116000  | -3.32384000 | -2.22627900 |
| H | -1.15411700 | 7.99492700  | -2.08911200 |
| C | 1.14711100  | -0.34165300 | 2.51010300  |
| H | 1.27902900  | 0.16547100  | 3.47016200  |
| H | 1.86803100  | -1.15803300 | 2.41182400  |
| H | 0.13331700  | -0.73974800 | 2.43912600  |
| S | 1.34571400  | 0.84822800  | 1.13730600  |
| H | 0.79502300  | -3.14904400 | 0.06007200  |
| C | 3.04456100  | 1.44261300  | 1.48891500  |
| H | 3.29893200  | 2.17522100  | 0.71790400  |
| H | 3.76113400  | 0.61788800  | 1.44867600  |
| H | 3.08322100  | 1.93180300  | 2.46662500  |
| H | 7.42507900  | 2.18100400  | 1.85752500  |
| S | 8.56585200  | 1.45816800  | 1.90833800  |
| C | 8.48429000  | 0.80628300  | 0.18559200  |
| H | 9.33932300  | 0.12531100  | 0.11940000  |
| H | 7.57925700  | 0.20038000  | 0.08010600  |
| H | 8.56470000  | 1.41929000  | -1.89289700 |
| H | 7.70851200  | 2.56337800  | -0.84401200 |
| H | 9.47728300  | 2.47734500  | -0.79443700 |
| C | 8.56495000  | 1.88102100  | -0.89638100 |
| H | -3.98044100 | 3.25830600  | 1.34591400  |
| C | -3.48458800 | 4.69293500  | -0.94745300 |
| H | -3.75137600 | 5.33590500  | -1.79508700 |
| H | -4.17102000 | 4.93335500  | -0.12776500 |
| H | -2.46959000 | 4.95254300  | -0.63041100 |

**TS1<sub>NoF</sub>**

|   |            |            |             |
|---|------------|------------|-------------|
| C | 0.97826800 | 7.65809600 | -1.96147200 |
| C | 0.90785700 | 6.53190300 | -0.95511400 |
| C | 0.55483200 | 6.77368000 | 0.38206300  |



|    |             |             |             |
|----|-------------|-------------|-------------|
| C  | 1.17030700  | 5.20673100  | -1.32010700 |
| C  | 0.44923500  | 5.74075300  | 1.30931200  |
| C  | 1.06909600  | 4.15619900  | -0.40448100 |
| C  | 0.69793600  | 4.41441600  | 0.92316500  |
| O  | 0.57467500  | 3.44477600  | 1.86531400  |
| C  | 7.27297100  | -3.56074200 | -1.42779600 |
| C  | 5.83854300  | -3.16134300 | -1.20550300 |
| C  | 4.89369400  | -4.11147000 | -0.79414700 |
| C  | 5.40235900  | -1.84984600 | -1.41902200 |
| C  | 3.55762800  | -3.77650000 | -0.60685100 |
| C  | 4.06359700  | -1.49209000 | -1.24426100 |
| C  | 3.14221300  | -2.45999600 | -0.83901500 |
| O  | 1.80677900  | -2.18045900 | -0.69346100 |
| C  | -5.93261500 | -1.94286000 | -0.45239200 |
| C  | -5.30468900 | -0.76119600 | -1.17039200 |
| O  | -4.57069400 | -0.89911600 | -2.14421500 |
| N  | -5.61932400 | 0.46641700  | -0.65501600 |
| Ni | -1.53344700 | -0.33592800 | 0.17806900  |
| N  | -1.03742100 | -1.22927300 | -1.72964800 |
| C  | -0.78019600 | 0.90981500  | -2.85872600 |
| C  | -0.91539500 | -0.57670000 | -2.82863300 |
| C  | -1.05180500 | -1.42776800 | -4.07396400 |
| C  | -1.69515900 | -2.68525700 | -3.46558800 |
| C  | -1.14894800 | -2.67220900 | -2.06649100 |
| N  | -1.73575100 | -2.26779900 | 0.95498300  |
| C  | -2.03805900 | -3.46946500 | -1.16315100 |
| C  | -1.52259400 | -3.55655800 | 0.24791900  |
| C  | -2.25469400 | -4.66453900 | 1.03592800  |
| C  | -2.35287600 | -4.00105200 | 2.38784800  |
| C  | -2.18468600 | -2.53291300 | 2.15578100  |
| N  | -0.13476000 | -3.99157300 | 0.33493900  |
| C  | 0.05067200  | -5.29561900 | 0.69300400  |
| O  | 1.11901300  | -5.88688400 | 0.75896800  |
| C  | -1.33689300 | -5.89046300 | 0.97144200  |
| N  | -2.47781500 | 0.41533500  | 1.89402800  |
| C  | -2.49220700 | -1.62662400 | 3.20071900  |
| C  | -2.61991600 | -0.26967800 | 3.06181700  |
| C  | -2.99650800 | 0.64602300  | 4.20996800  |
| C  | -3.42737700 | 1.92007000  | 3.48012000  |
| C  | -2.92789200 | 1.69220100  | 2.05589400  |
| N  | -2.13861200 | 1.38262700  | -0.82243800 |
| C  | -3.01705300 | 2.64421400  | 1.06931100  |
| C  | -2.68502000 | 2.45762400  | -0.30227600 |
| C  | -3.03877700 | 3.50989300  | -1.36207400 |
| C  | -2.17630800 | 3.03028300  | -2.54163600 |
| C  | -2.06111500 | 1.53190200  | -2.29071600 |
| H  | 1.53750600  | 8.51695900  | -1.57062600 |
| H  | 1.46953800  | 7.33575900  | -2.88589300 |
| H  | 0.35551200  | 7.79396200  | 0.70479500  |
| H  | 1.46551900  | 4.98508800  | -2.34428900 |
| H  | 0.17469400  | 5.93929900  | 2.34117800  |
| H  | 1.28877400  | 3.13720800  | -0.70934800 |
| H  | 0.64156000  | 2.54840500  | 1.45386800  |
| H  | 7.64327300  | -4.20271100 | -0.61950400 |
| H  | 7.93104400  | -2.68669200 | -1.48526600 |
| H  | 5.21153600  | -5.13514700 | -0.60716100 |
| H  | 6.11547200  | -1.09335000 | -1.74037200 |
| H  | 2.84235700  | -4.51904700 | -0.26160200 |
| H  | 3.73334900  | -0.47262700 | -1.42329100 |
| H  | 1.62419300  | -1.24034200 | -0.41897100 |
| H  | -5.22632700 | -2.31125800 | 0.30184100  |

|   |             |             |             |
|---|-------------|-------------|-------------|
| H | -6.11282800 | -2.74440200 | -1.17173000 |
| H | -6.02182000 | 0.53458500  | 0.26902800  |
| H | -5.02997000 | 1.23967600  | -0.93443700 |
| H | 0.07829600  | 1.23873600  | -2.26194500 |
| H | -0.63266500 | 1.25317800  | -3.88848700 |
| H | -1.45943200 | -3.60440800 | -4.01191500 |
| H | -0.12987900 | -3.07593600 | -2.03627600 |
| H | -3.04854700 | -3.04492100 | -1.16144600 |
| H | -2.10552900 | -4.48505700 | -1.57692600 |
| H | -1.54840500 | -4.34429800 | 3.05736300  |
| H | -1.32251900 | -6.49005700 | 1.88615700  |
| H | -1.59968200 | -6.56404600 | 0.14676100  |
| H | -2.71563300 | -2.05981300 | 4.17061300  |
| H | -3.77186600 | 0.21460700  | 4.84986400  |
| H | -3.00842500 | 2.83625200  | 3.90720200  |
| H | -4.10339500 | 3.36368600  | -1.61883000 |
| H | -1.18629600 | 3.50067300  | -2.47828300 |
| H | -2.92463800 | 1.00216300  | -2.72115200 |
| H | -6.87073100 | -1.68663100 | 0.05007400  |
| H | -2.11468800 | 0.82028100  | 4.83962500  |
| H | -4.51873300 | 2.03782300  | 3.47798500  |
| H | -2.60710700 | 3.26879300  | -3.51958700 |
| H | -1.64761900 | -0.93077800 | -4.84721400 |
| H | -0.05814800 | -1.62729400 | -4.50355600 |
| H | -2.78342700 | -2.55944600 | -3.43977800 |
| H | -3.28704300 | -4.22066700 | 2.91982600  |
| H | -3.24752800 | -4.84745200 | 0.61299100  |
| H | 7.39740900  | -4.12281900 | -2.36374200 |
| H | -0.02125100 | 8.02464300  | -2.23318200 |
| C | 1.07195900  | -0.48414600 | 2.33863100  |
| H | 1.71632300  | 0.12884100  | 2.97321600  |
| H | 1.55796300  | -1.44743900 | 2.16135800  |
| H | 0.12512800  | -0.65488800 | 2.85407000  |
| S | 0.76996200  | 0.38571300  | 0.74071700  |
| H | 0.64024300  | -3.38808800 | 0.04746900  |
| C | 3.32756900  | 1.42828000  | 1.03348000  |
| H | 3.50562300  | 1.84614000  | 0.04982100  |
| H | 3.76004000  | 0.46663600  | 1.27832100  |
| H | 3.01486300  | 2.09485800  | 1.82773200  |
| H | 5.66213800  | 1.99025300  | 2.00676300  |
| S | 6.96306800  | 1.86714700  | 2.36901700  |
| C | 7.51714200  | 1.00092500  | 0.83827000  |
| H | 8.55645200  | 0.72398800  | 1.04326300  |
| H | 6.94878000  | 0.07187200  | 0.73199800  |
| H | 7.80169300  | 1.29505600  | -1.29209300 |
| H | 6.38310200  | 2.13223600  | -0.63305400 |
| H | 8.00468400  | 2.77408200  | -0.32539600 |
| C | 7.42208000  | 1.85289200  | -0.42550900 |
| H | -3.40946500 | 3.61442700  | 1.35274200  |
| C | -2.84417200 | 4.97508700  | -0.96387800 |
| H | -3.04015700 | 5.62525100  | -1.82440200 |
| H | -3.53320900 | 5.27490400  | -0.16652600 |
| H | -1.82250300 | 5.16113600  | -0.62095700 |

**Int1<sub>NoF</sub>**

|   |             |            |             |
|---|-------------|------------|-------------|
| C | -0.97293900 | 7.78387199 | -1.89637499 |
| C | -0.66289418 | 6.67718525 | -0.90978387 |
| C | -0.99457307 | 6.80262992 | 0.44759461  |
| C | -0.06787583 | 5.47565212 | -1.31591737 |
| C | -0.77444818 | 5.76912001 | 1.35514738  |

|    |             |             |             |
|----|-------------|-------------|-------------|
| C  | 0.16293715  | 4.42846067  | -0.42069606 |
| C  | -0.20464792 | 4.56167092  | 0.92687647  |
| O  | -0.02225542 | 3.58210552  | 1.84888031  |
| C  | 7.67483694  | -1.75337401 | -1.73104199 |
| C  | 6.19384937  | -1.68415708 | -1.45407828 |
| C  | 5.47987260  | -2.84542864 | -1.12683585 |
| C  | 5.48705279  | -0.47844358 | -1.52741699 |
| C  | 4.11060575  | -2.81698905 | -0.89139696 |
| C  | 4.10969492  | -0.42732056 | -1.30018508 |
| C  | 3.42174232  | -1.60197598 | -0.98726768 |
| O  | 2.06520718  | -1.62552125 | -0.79820543 |
| C  | -5.52081899 | -3.12982697 | -0.33947100 |
| C  | -5.03624350 | -1.81195272 | -0.91073346 |
| O  | -4.33961385 | -1.75016326 | -1.92038239 |
| N  | -5.42556799 | -0.70329910 | -0.21325882 |
| Ni | -1.52171638 | -0.56800300 | 0.20326711  |
| N  | -0.94121040 | -1.32916644 | -1.75356309 |
| C  | -1.20489194 | 0.82604070  | -2.85574182 |
| C  | -1.00438582 | -0.65534988 | -2.84520973 |
| C  | -0.99095465 | -1.50732956 | -4.09862412 |
| C  | -1.32445398 | -2.88087200 | -3.48829096 |
| C  | -0.74577269 | -2.75904683 | -2.10748028 |
| N  | -1.31119609 | -2.52223172 | 0.93870851  |
| C  | -1.41069911 | -3.74056629 | -1.19163003 |
| C  | -0.84412226 | -3.72412081 | 0.20268667  |
| C  | -1.28742229 | -4.97477765 | 0.99297376  |
| C  | -1.48256797 | -4.36409095 | 2.35992895  |
| C  | -1.65021542 | -2.88981406 | 2.14884616  |
| N  | 0.60771656  | -3.84105195 | 0.23908813  |
| C  | 1.08628145  | -5.08265351 | 0.54517458  |
| O  | 2.25789631  | -5.43131239 | 0.54052614  |
| C  | -0.12602028 | -5.96936874 | 0.87134933  |
| N  | -2.57990440 | -0.06797152 | 1.95251238  |
| C  | -2.11512463 | -2.08270961 | 3.21859640  |
| C  | -2.53343828 | -0.78311510 | 3.11239383  |
| C  | -3.05943720 | 0.02481299  | 4.28439844  |
| C  | -3.81200999 | 1.15804498  | 3.57935897  |
| C  | -3.28466686 | 1.08150385  | 2.15086911  |
| N  | -2.53594916 | 0.98486390  | -0.75463571 |
| C  | -3.58473132 | 2.01717067  | 1.19031813  |
| C  | -3.26630905 | 1.92253796  | -0.19353481 |
| C  | -3.88955683 | 2.87949726  | -1.21687415 |
| C  | -3.03545201 | 2.57472196  | -2.45796398 |
| C  | -2.56725452 | 1.14217225  | -2.22452091 |
| H  | -0.85677392 | 8.77407412  | -1.44011692 |
| H  | -0.31185037 | 7.73984665  | -2.76942718 |
| H  | -1.44355529 | 7.72900454  | 0.80273180  |
| H  | 0.22850978  | 5.35227825  | -2.35679521 |
| H  | -1.04053082 | 5.87603287  | 2.40314074  |
| H  | 0.64064977  | 3.51045441  | -0.75353647 |
| H  | 0.18879507  | 2.71931871  | 1.41089366  |
| H  | 8.19020217  | -2.40050709 | -1.01063938 |
| H  | 8.14162547  | -0.76316925 | -1.68214901 |
| H  | 6.00933945  | -3.79289032 | -1.04375323 |
| H  | 6.01645886  | 0.44008941  | -1.77460912 |
| H  | 3.57777084  | -3.71989544 | -0.60271415 |
| H  | 3.57054834  | 0.51449697  | -1.36505309 |
| H  | 1.69287856  | -0.75603053 | -0.46972662 |
| H  | -4.77863793 | -3.50048824 | 0.37890197  |
| H  | -5.61233183 | -3.86232437 | -1.14419548 |
| H  | -5.79843234 | -0.81402459 | 0.71934153  |

|   |             |             |             |
|---|-------------|-------------|-------------|
| H | -4.88142024 | 0.13699289  | -0.36355314 |
| H | -0.41621984 | 1.33444175  | -2.28855036 |
| H | -1.18195229 | 1.20114279  | -3.88506697 |
| H | -0.91212210 | -3.72225856 | -4.05566233 |
| H | 0.33719880  | -2.93185989 | -2.11521758 |
| H | -2.48910257 | -3.54940081 | -1.15626683 |
| H | -1.26422888 | -4.74223629 | -1.61918946 |
| H | -0.59888239 | -4.52595349 | 2.99747494  |
| H | 0.06008566  | -6.55711500 | 1.77528582  |
| H | -0.27129177 | -6.67972365 | 0.04825776  |
| H | -2.20481268 | -2.56595790 | 4.18662053  |
| H | -3.67747608 | -0.57117866 | 4.96258685  |
| H | -3.64454376 | 2.14545289  | 4.02056903  |
| H | -4.92186647 | 2.53059913  | -1.39222293 |
| H | -2.17173395 | 3.25347755  | -2.47392196 |
| H | -3.30588135 | 0.42563722  | -2.61228119 |
| H | -6.48105204 | -3.03901825 | 0.17934801  |
| H | -2.21214412 | 0.41025605  | 4.86666490  |
| H | -4.89684942 | 0.98499381  | 3.58284896  |
| H | -3.58005621 | 2.69631867  | -3.40017947 |
| H | -1.70488589 | -1.14701217 | -4.84769813 |
| H | 0.00841518  | -1.48092736 | -4.55992735 |
| H | -2.41246666 | -2.99673500 | -3.42704398 |
| H | -2.32575260 | -4.78969143 | 2.91883650  |
| H | -2.23015877 | -5.36713374 | 0.59792165  |
| H | 7.88271128  | -2.16106202 | -2.73032340 |
| H | -2.00567205 | 7.71997598  | -2.26794321 |
| C | 1.14031814  | -0.12993569 | 2.28637717  |
| H | 1.99758155  | 0.44906704  | 2.64113643  |
| H | 1.45049633  | -1.16793006 | 2.13771321  |
| H | 0.35511255  | -0.09907793 | 3.04643265  |
| S | 0.54269680  | 0.59885760  | 0.70424046  |
| H | 1.21988242  | -3.07889747 | -0.06678102 |
| C | 3.80321036  | 3.07914884  | 1.71561622  |
| H | 4.19280794  | 3.92748401  | 1.14454209  |
| H | 3.74736954  | 2.19930417  | 1.06766780  |
| H | 2.80119581  | 3.31922197  | 2.08214875  |
| H | 4.47125148  | 2.87025157  | 2.55683707  |
| S | 6.68246889  | 0.47416867  | 3.48490189  |
| C | 7.40730259  | 0.13769759  | 1.85179743  |
| H | 8.10216560  | -0.70436615 | 1.97365014  |
| H | 6.58543040  | -0.25099893 | 1.23257719  |
| H | 8.47898671  | 1.04672565  | 0.19884381  |
| H | 7.36967635  | 2.15253628  | 1.03671283  |
| H | 8.91238546  | 1.71205272  | 1.78668044  |
| C | 8.08179189  | 1.33382772  | 1.18129542  |
| H | -4.16948825 | 2.87603124  | 1.50087401  |
| C | -3.94064671 | 4.35684820  | -0.81696413 |
| H | -4.32533077 | 4.95677263  | -1.65037921 |
| H | -4.60376941 | 4.52653943  | 0.03888066  |
| H | -2.94577661 | 4.73076634  | -0.55813214 |

#### React<sub>Нбы</sub>

|    |            |             |             |
|----|------------|-------------|-------------|
| Ni | 0.70416331 | -2.19357021 | 1.73722285  |
| N  | 1.44315161 | -1.12763309 | 0.31680481  |
| C  | 2.32930393 | -0.92489820 | -1.87672362 |
| C  | 2.14995269 | 0.49742394  | -1.21315352 |
| C  | 1.41131147 | 0.15513212  | 0.08621053  |
| N  | 0.21553569 | -0.51427520 | 2.71887217  |
| C  | 0.76159324 | 1.11325861  | 0.97043964  |

|   |             |             |             |
|---|-------------|-------------|-------------|
| C | 0.24922080  | 0.77485023  | 2.21864818  |
| C | -0.46512755 | 1.71205289  | 3.23419843  |
| C | -0.45426172 | 0.83260856  | 4.52939840  |
| C | -0.29010090 | -0.56244897 | 3.96310256  |
| N | 0.29950863  | -3.44430521 | 3.19531919  |
| C | -0.57304893 | -1.72795591 | 4.68732158  |
| C | -0.32066938 | -3.05973833 | 4.32550138  |
| C | -0.76162783 | -4.27583283 | 5.13707133  |
| C | 0.22315730  | -5.35326215 | 4.58486340  |
| C | 0.55749072  | -4.80941778 | 3.19072864  |
| N | 1.18139588  | -3.73655290 | 0.55042647  |
| C | 1.12041043  | -5.53565198 | 2.15950434  |
| C | 1.53618018  | -4.94551534 | 0.88251190  |
| C | 2.56341165  | -4.46571934 | -1.28273539 |
| C | 1.67119097  | -3.30828263 | -0.76572273 |
| H | -1.03506359 | -1.57310741 | 5.65706204  |
| H | 0.78112151  | -3.20560949 | -1.39260573 |
| C | -2.87464142 | -1.64648431 | 1.40287905  |
| H | -2.06247107 | -1.58134223 | 2.12820077  |
| H | -3.32233453 | -2.64053715 | 1.45967730  |
| H | -3.61914432 | -0.87032978 | 1.60057908  |
| S | -2.13604835 | -1.39932183 | -0.25084102 |
| C | -3.66712652 | -1.52708173 | -1.23842621 |
| H | -3.39659239 | -1.41226849 | -2.28939808 |
| H | -4.35706027 | -0.72654862 | -0.95710247 |
| H | -4.13796805 | -2.50302253 | -1.09369700 |
| S | -5.85165658 | 0.44056051  | -3.89869429 |
| C | -4.05351837 | 0.50741845  | -4.32238602 |
| H | -3.65367773 | -0.51127973 | -4.34471241 |
| H | -3.53825571 | 1.07337557  | -3.54687270 |
| C | -3.86455400 | 1.18191800  | -5.67637300 |
| H | -4.23413532 | 2.21110458  | -5.65125995 |
| H | -2.79879635 | 1.21143157  | -5.92888201 |
| H | -4.38732287 | 0.64513050  | -6.47578281 |
| C | 2.31026121  | -1.86993512 | -0.61521811 |
| C | 3.68119782  | -2.00941609 | 0.08686762  |
| H | 3.56885657  | -2.62935830 | 0.97881008  |
| H | 4.44121524  | -2.46313358 | -0.55280119 |
| H | 4.05017263  | -1.03561539 | 0.41242936  |
| C | 1.08955878  | -1.15544484 | -2.76877058 |
| H | 1.04447701  | -0.38357740 | -3.54541144 |
| H | 1.11603661  | -2.12453308 | -3.27480810 |
| H | 0.16454724  | -1.10213251 | -2.18536204 |
| C | 3.58819830  | -1.05950253 | -2.74190736 |
| H | 3.67390137  | -2.07911728 | -3.13377739 |
| H | 3.54301103  | -0.37939159 | -3.60039806 |
| H | 4.50602450  | -0.83864893 | -2.19285355 |
| C | -1.93818035 | 1.88145936  | 2.79306739  |
| H | -2.44032521 | 0.91047728  | 2.74096021  |
| H | -2.47756815 | 2.50095923  | 3.51971493  |
| H | -2.03061983 | 2.34907992  | 1.81160002  |
| C | 0.16327873  | 3.09463934  | 3.47256386  |
| H | -0.04531438 | 3.78764093  | 2.65749854  |
| H | -0.26156128 | 3.53715125  | 4.38030044  |
| H | 1.24812048  | 3.03794461  | 3.60097829  |
| C | -0.71739615 | -4.07783612 | 6.65654426  |
| H | -1.48721139 | -3.36719047 | 6.97522362  |
| H | -0.91727967 | -5.02388598 | 7.17201083  |
| H | 0.25022695  | -3.69968194 | 6.99688584  |
| C | -2.20442948 | -4.63312168 | 4.69965404  |
| H | -2.54612479 | -5.53634467 | 5.21980831  |

|   |             |             |             |
|---|-------------|-------------|-------------|
| H | -2.89358492 | -3.81768633 | 4.94470068  |
| H | -2.25154937 | -4.80942739 | 3.62080653  |
| C | 1.27159579  | -7.03467710 | 2.34386117  |
| H | 0.60963146  | -7.57569212 | 1.65839589  |
| H | 2.29195064  | -7.38202785 | 2.16201238  |
| H | 1.00851527  | -7.35082945 | 3.35190076  |
| C | 2.47267144  | -5.59276663 | -0.16610929 |
| C | 1.94150155  | -6.92795145 | -0.72296739 |
| H | 2.02010561  | -7.73002730 | 0.00981456  |
| H | 0.89678066  | -6.85492493 | -1.02963380 |
| H | 2.53212653  | -7.23857420 | -1.58964665 |
| C | 3.87563492  | -5.80177433 | 0.45188854  |
| H | 3.87449935  | -6.58076432 | 1.21876695  |
| H | 4.57808425  | -6.11087696 | -0.33191824 |
| H | 4.25138391  | -4.88940953 | 0.92307511  |
| C | 0.66906662  | 2.54928191  | 0.47957844  |
| H | 1.40022889  | 3.20874491  | 0.96067951  |
| H | 0.83533884  | 2.61945782  | -0.59513443 |
| H | -0.32148899 | 2.97364290  | 0.65414412  |
| H | -1.40204627 | 0.94115591  | 5.06958968  |
| C | 0.69779883  | 1.10354463  | 5.51697261  |
| H | 0.62533351  | 2.09612604  | 5.97030562  |
| H | 0.68136328  | 0.36077192  | 6.32043103  |
| H | 1.66929324  | 1.03126582  | 5.01401072  |
| C | 1.52225437  | -5.49445621 | 5.40381240  |
| H | 2.03231000  | -4.52879528 | 5.48866723  |
| H | 1.32065139  | -5.86902484 | 6.41250584  |
| H | 2.21445214  | -6.18474930 | 4.91478810  |
| H | -0.28330900 | -6.32147907 | 4.53857117  |
| H | 3.60412121  | -4.13637116 | -1.31940546 |
| C | 2.18207462  | -4.88393380 | -2.70770968 |
| H | 2.28099224  | -4.02993748 | -3.38630559 |
| H | 2.83279593  | -5.67536457 | -3.09235382 |
| H | 1.14795186  | -5.23628868 | -2.76297074 |
| C | 3.42616570  | 1.32764373  | -0.98768716 |
| H | 3.18204567  | 2.27823844  | -0.50735341 |
| H | 4.14793238  | 0.81313932  | -0.34968775 |
| H | 3.91832064  | 1.55326724  | -1.93885943 |
| H | 1.49714971  | 1.09728261  | -1.86066184 |
| H | -5.70144126 | 0.25247465  | -2.57379601 |
| C | 0.03880500  | -8.95451900 | -3.01748400 |
| C | -1.43662526 | -8.51102742 | -2.94672937 |
| C | -1.65111536 | -7.45975147 | -1.87937734 |
| C | -1.93563539 | -7.82107031 | -0.55583098 |
| C | -1.46942224 | -6.09871531 | -2.15907724 |
| C | -2.00545167 | -6.86903021 | 0.46045918  |
| C | -1.53482351 | -5.13348475 | -1.15546304 |
| C | -1.78686443 | -5.52142246 | 0.16538770  |
| O | -1.85752720 | -4.61531487 | 1.18694670  |
| C | -2.33178300 | 6.38467200  | -4.58248000 |
| C | -2.34911047 | 4.87201159  | -4.88268049 |
| C | -2.50971305 | 4.00108930  | -3.64982347 |
| C | -3.68946309 | 4.05500328  | -2.89025112 |
| C | -1.51469946 | 3.10917676  | -3.23314316 |
| C | -3.87126204 | 3.26111876  | -1.76332519 |
| C | -1.68257290 | 2.29481278  | -2.10904856 |
| C | -2.86670064 | 2.37017043  | -1.36647319 |
| O | -3.10302135 | 1.60750887  | -0.26182499 |
| H | -2.06986401 | -9.38381650 | -2.74410958 |
| H | -1.74603173 | -8.12032973 | -3.92440024 |
| H | -2.08617336 | -8.87069014 | -0.31145291 |

|   |             |             |             |
|---|-------------|-------------|-------------|
| H | -1.26401071 | -5.78801630 | -3.18178669 |
| H | -2.20792748 | -7.15187007 | 1.48900998  |
| H | -1.39685343 | -4.07943274 | -1.37616438 |
| H | -1.18646979 | -3.92121072 | 1.05179531  |
| H | 0.36959123  | -9.35753886 | -2.05439335 |
| H | -3.17004652 | 4.65927409  | -5.58171596 |
| H | -1.42586916 | 4.59426214  | -5.40564289 |
| H | -0.58984328 | 3.03537607  | -3.80204186 |
| H | -4.49130614 | 4.72230690  | -3.19786336 |
| H | -0.91052220 | 1.59078242  | -1.81236393 |
| H | -4.79262401 | 3.29500169  | -1.19062009 |
| H | -2.46494045 | 0.86409702  | -0.21044877 |
| H | -1.49703813 | 6.64035094  | -3.92119652 |
| H | 0.68793273  | -8.10671100 | -3.25903787 |
| H | 0.18572039  | -9.72677062 | -3.78148362 |
| H | -3.25587948 | 6.69947635  | -4.08673332 |
| H | -2.22883710 | 6.96537411  | -5.50539448 |
| C | 7.27036300  | -0.96856400 | 5.68488600  |
| C | 6.14354862  | -1.92082658 | 5.27174721  |
| C | 5.41402831  | -1.46459005 | 3.99295565  |
| C | 4.31200070  | -2.45647571 | 3.63330244  |
| O | 4.57009733  | -3.56646481 | 3.17331007  |
| N | 3.04156483  | -2.06939822 | 3.94436244  |
| H | 5.41183990  | -2.00609295 | 6.08610356  |
| H | 6.53623667  | -2.92900458 | 5.09728403  |
| H | 5.01495240  | -0.45087017 | 4.13015293  |
| H | 6.11881461  | -1.43711447 | 3.15459165  |
| H | 2.81019734  | -1.09315723 | 4.05276042  |
| H | 2.28210632  | -2.64834056 | 3.59901578  |
| H | 6.88552336  | 0.03781328  | 5.88921077  |
| H | 8.02311582  | -0.88062606 | 4.89236934  |
| H | 7.77770729  | -1.32177611 | 6.58924381  |

**TS1<sub>Hby</sub>**

|    |             |             |             |
|----|-------------|-------------|-------------|
| Ni | 0.30481600  | -1.48021400 | 1.41688200  |
| N  | 1.34764200  | -0.42755500 | 0.12134500  |
| C  | 2.24371500  | -0.28049600 | -2.06810600 |
| C  | 2.03810500  | 1.15639100  | -1.44761200 |
| C  | 1.28077500  | 0.83586300  | -0.15572800 |
| N  | 0.00860600  | 0.21396000  | 2.44767900  |
| C  | 0.58218100  | 1.81112300  | 0.67766100  |
| C  | 0.06658800  | 1.49835600  | 1.92441800  |
| C  | -0.61852200 | 2.45942300  | 2.93008900  |
| C  | -0.54110000 | 1.61665700  | 4.24565100  |
| C  | -0.44665300 | 0.20806800  | 3.70472300  |
| N  | 0.06663300  | -2.68299900 | 2.98773100  |
| C  | -0.75230900 | -0.93223800 | 4.46409000  |
| C  | -0.53790400 | -2.27104700 | 4.11529200  |
| C  | -0.97336400 | -3.46677100 | 4.95411100  |
| C  | 0.03628400  | -4.54065700 | 4.44914100  |
| C  | 0.36932700  | -4.03868800 | 3.03966700  |
| N  | 1.10113600  | -3.01665300 | 0.42252200  |
| C  | 0.99094900  | -4.78161800 | 2.06043500  |
| C  | 1.42840800  | -4.21901400 | 0.77718700  |
| C  | 2.44832600  | -3.80517000 | -1.40530000 |
| C  | 1.58166100  | -2.62418900 | -0.90076800 |
| H  | -1.19135100 | -0.74627100 | 5.43773300  |
| H  | 0.68145400  | -2.52973100 | -1.51509300 |
| C  | -3.04516900 | -1.18503800 | 1.50383400  |
| H  | -2.56671300 | -0.95066800 | 2.45563300  |

|   |             |             |             |
|---|-------------|-------------|-------------|
| H | -3.59815900 | -2.12165700 | 1.61026700  |
| H | -3.73850900 | -0.38268100 | 1.24198000  |
| S | -1.76199500 | -1.35442000 | 0.18950200  |
| C | -3.96107100 | -1.66442800 | -1.59171800 |
| H | -3.37636400 | -1.91376800 | -2.46613500 |
| H | -4.18058200 | -0.63085900 | -1.36787900 |
| H | -4.39560000 | -2.45744500 | -0.99869200 |
| S | -5.94955300 | 0.39949500  | -4.01965000 |
| C | -4.14425100 | 0.36743500  | -4.41721700 |
| H | -3.84053400 | -0.67414500 | -4.55148800 |
| H | -3.59551200 | 0.78263800  | -3.57136700 |
| C | -3.86484000 | 1.18153900  | -5.67602000 |
| H | -4.16951800 | 2.22403400  | -5.54287500 |
| H | -2.79034400 | 1.17736200  | -5.88724800 |
| H | -4.38941900 | 0.77327500  | -6.54581800 |
| C | 2.22578100  | -1.19026400 | -0.78162500 |
| C | 3.58849000  | -1.30293500 | -0.06738800 |
| H | 3.47725900  | -1.87390700 | 0.85598700  |
| H | 4.34161400  | -1.79591000 | -0.68492800 |
| H | 3.96858600  | -0.31697100 | 0.20366000  |
| C | 1.01806400  | -0.56284900 | -2.96509900 |
| H | 0.93853200  | 0.20670700  | -3.74052000 |
| H | 1.09691100  | -1.52681800 | -3.47355100 |
| H | 0.08579700  | -0.56333100 | -2.39162500 |
| C | 3.51241700  | -0.42022900 | -2.91579400 |
| H | 3.61767600  | -1.44933800 | -3.27547500 |
| H | 3.46211800  | 0.23143500  | -3.79509800 |
| H | 4.41995300  | -0.16596300 | -2.36497600 |
| C | -2.10893100 | 2.59841700  | 2.53768600  |
| H | -2.60199900 | 1.62299500  | 2.52097500  |
| H | -2.62380400 | 3.23712000  | 3.26450800  |
| H | -2.23172900 | 3.02875500  | 1.54327000  |
| C | 0.00803700  | 3.85155000  | 3.10674600  |
| H | -0.24460400 | 4.52190200  | 2.28628500  |
| H | -0.38108800 | 4.31038600  | 4.02208900  |
| H | 1.09776600  | 3.80717000  | 3.18619100  |
| C | -0.96944300 | -3.22902800 | 6.46710500  |
| H | -1.76062500 | -2.52703700 | 6.74899000  |
| H | -1.16376500 | -4.16574400 | 6.99947900  |
| H | -0.01746700 | -2.82483500 | 6.82072200  |
| C | -2.40029100 | -3.85517400 | 4.48771500  |
| H | -2.74153300 | -4.73793200 | 5.04019000  |
| H | -3.10468900 | -3.03915200 | 4.67790500  |
| H | -2.41650300 | -4.08517600 | 3.41830300  |
| C | 1.18949700  | -6.26492900 | 2.30535700  |
| H | 0.57391700  | -6.85136500 | 1.61674800  |
| H | 2.22796900  | -6.57908300 | 2.17489900  |
| H | 0.89789900  | -6.55440300 | 3.31280900  |
| C | 2.36670200  | -4.89712400 | -0.25417600 |
| C | 1.86030200  | -6.25815900 | -0.76835000 |
| H | 1.95059300  | -7.03357500 | -0.00967400 |
| H | 0.81875200  | -6.21715900 | -1.08741600 |
| H | 2.46799900  | -6.58334100 | -1.61750300 |
| C | 3.77140000  | -5.07088800 | 0.37115000  |
| H | 3.77738000  | -5.82732100 | 1.15960400  |
| H | 4.47296300  | -5.40017800 | -0.40429600 |
| H | 4.14019500  | -4.14157200 | 0.81093600  |
| C | 0.45570700  | 3.22063300  | 0.12503600  |
| H | 1.20940600  | 3.90554500  | 0.53029200  |
| H | 0.55303700  | 3.23076900  | -0.95990000 |
| H | -0.52708500 | 3.64370800  | 0.33365800  |



|   |             |             |             |
|---|-------------|-------------|-------------|
| H | -1.44521800 | 1.75830500  | 4.84819600  |
| C | 0.69101800  | 1.88079600  | 5.13524500  |
| H | 0.67633100  | 2.88494900  | 5.56640600  |
| H | 0.71860300  | 1.16023500  | 5.95869700  |
| H | 1.61604800  | 1.77533300  | 4.55617700  |
| C | 1.33088400  | -4.62136700 | 5.28319400  |
| H | 1.81306300  | -3.64026300 | 5.34311300  |
| H | 1.12876300  | -4.97188400 | 6.29955200  |
| H | 2.04586100  | -5.30654100 | 4.82188000  |
| H | -0.44889100 | -5.52023000 | 4.43169000  |
| H | 3.49206000  | -3.49147300 | -1.47707700 |
| C | 2.02004700  | -4.25682800 | -2.80691900 |
| H | 2.12112600  | -3.42593100 | -3.51247300 |
| H | 2.64392400  | -5.07206800 | -3.18359100 |
| H | 0.97810100  | -4.58866000 | -2.82470900 |
| C | 3.29453500  | 2.01577500  | -1.21949000 |
| H | 3.02198500  | 2.98013100  | -0.78372900 |
| H | 4.01053000  | 1.53974800  | -0.54631100 |
| H | 3.80274500  | 2.21298200  | -2.16770800 |
| H | 1.38659900  | 1.72995300  | -2.11625800 |
| H | -5.86083800 | -0.40235600 | -2.93664000 |
| C | 0.03876800  | -8.95446000 | -3.01758700 |
| C | -1.34683500 | -8.28607000 | -3.08699900 |
| C | -1.54565600 | -7.21761600 | -2.03218500 |
| C | -1.72568700 | -7.56691500 | -0.68483100 |
| C | -1.53372500 | -5.85316100 | -2.34855000 |
| C | -1.88090100 | -6.60120000 | 0.30528100  |
| C | -1.68763400 | -4.86758300 | -1.37021100 |
| C | -1.86564300 | -5.23844600 | -0.02846600 |
| O | -2.04055800 | -4.33905800 | 0.96775300  |
| C | -2.33227700 | 6.38456700  | -4.58263300 |
| C | -2.42228800 | 4.88594700  | -4.92853000 |
| C | -2.52137500 | 3.97645700  | -3.71935300 |
| C | -3.62254500 | 4.05418100  | -2.85088300 |
| C | -1.54561400 | 3.01429500  | -3.43543700 |
| C | -3.74194900 | 3.22083600  | -1.74439400 |
| C | -1.65183500 | 2.16390600  | -2.33145300 |
| C | -2.75140900 | 2.26662000  | -1.47059300 |
| O | -2.91261200 | 1.49225300  | -0.36837400 |
| H | -2.11949200 | -9.05837900 | -2.97737300 |
| H | -1.48970900 | -7.84904600 | -4.08242600 |
| H | -1.74636800 | -8.61845000 | -0.40626700 |
| H | -1.40716200 | -5.54856700 | -3.38541000 |
| H | -2.02882400 | -6.87743900 | 1.34461400  |
| H | -1.69769000 | -3.81443400 | -1.63313100 |
| H | -1.85510200 | -3.42365600 | 0.63564300  |
| H | 0.19860700  | -9.41953600 | -2.03903200 |
| H | -3.29554300 | 4.72021500  | -5.57429000 |
| H | -1.54831300 | 4.59929100  | -5.52572400 |
| H | -0.68462200 | 2.91594400  | -4.09360000 |
| H | -4.41242800 | 4.77343600  | -3.05357000 |
| H | -0.88715300 | 1.42280100  | -2.13166800 |
| H | -4.60363000 | 3.27591000  | -1.08738400 |
| H | -2.27629200 | 0.73717300  | -0.34657400 |
| H | -1.44863800 | 6.58915400  | -3.96904800 |
| H | 0.83286000  | -8.21417700 | -3.16196400 |
| H | 0.14631300  | -9.72945300 | -3.78423100 |
| H | -3.21022200 | 6.71336800  | -4.01736800 |
| H | -2.26911300 | 6.99392500  | -5.49035100 |
| C | 7.27033400  | -0.96865300 | 5.68501600  |
| C | 6.13556900  | -1.78161500 | 5.05739100  |

|   |            |             |            |
|---|------------|-------------|------------|
| C | 5.10523900 | -0.90167800 | 4.33460400 |
| C | 4.04748000 | -1.74770400 | 3.63321200 |
| O | 4.35557800 | -2.69332500 | 2.91043900 |
| N | 2.75194600 | -1.41464000 | 3.87767700 |
| H | 5.62382800 | -2.36740200 | 5.83187400 |
| H | 6.52807200 | -2.50310400 | 4.33384700 |
| H | 4.65038000 | -0.18810900 | 5.03301400 |
| H | 5.61127600 | -0.31292700 | 3.55817800 |
| H | 2.48823500 | -0.58128000 | 4.37779400 |
| H | 2.02281000 | -1.90956300 | 3.37851600 |
| H | 6.88944100 | -0.25506900 | 6.42505800 |
| H | 7.81371700 | -0.39656300 | 4.92395100 |
| H | 7.99124100 | -1.61901500 | 6.19064000 |

**Int1<sub>Hby</sub>**

|    |             |             |             |
|----|-------------|-------------|-------------|
| Ni | 0.28130420  | -1.45372877 | 0.99394447  |
| N  | 1.27858179  | -0.41050599 | -0.35862762 |
| C  | 2.17103347  | -0.28735374 | -2.55180005 |
| C  | 1.98998122  | 1.15679187  | -1.93688213 |
| C  | 1.25593378  | 0.85787756  | -0.62652800 |
| N  | 0.12092633  | 0.26794481  | 2.03641745  |
| C  | 0.62131154  | 1.85176753  | 0.23354528  |
| C  | 0.16290747  | 1.54997349  | 1.50362372  |
| C  | -0.46098280 | 2.52292280  | 2.53638642  |
| C  | -0.33139317 | 1.68648872  | 3.85171451  |
| C  | -0.25916275 | 0.27337566  | 3.31638504  |
| N  | 0.24701706  | -2.62711159 | 2.61662998  |
| C  | -0.50208118 | -0.85838731 | 4.10999302  |
| C  | -0.28802772 | -2.19933115 | 3.77283107  |
| C  | -0.65193491 | -3.38044690 | 4.66548566  |
| C  | 0.32073173  | -4.46243191 | 4.10724546  |
| C  | 0.55655066  | -3.98036639 | 2.67123029  |
| N  | 1.05648205  | -3.00669045 | -0.02143507 |
| C  | 1.10498559  | -4.73744447 | 1.66035660  |
| C  | 1.44795853  | -4.18794261 | 0.34448447  |
| C  | 2.33964291  | -3.79476507 | -1.89786053 |
| C  | 1.48672748  | -2.61585102 | -1.36399914 |
| H  | -0.88484407 | -0.66148304 | 5.10538527  |
| H  | 0.56560499  | -2.51294541 | -1.94608991 |
| C  | -3.06633336 | -1.20957074 | 1.45953145  |
| H  | -2.56288156 | -0.75302889 | 2.31376498  |
| H  | -3.43052726 | -2.19724803 | 1.75417647  |
| H  | -3.91570244 | -0.58712656 | 1.16836817  |
| S  | -1.90736913 | -1.35420969 | 0.02989737  |
| C  | -4.99556355 | -1.63595708 | -1.64837654 |
| H  | -4.21939297 | -2.04843445 | -2.29638660 |
| H  | -4.72360025 | -0.61422118 | -1.37498706 |
| H  | -5.05789583 | -2.24618405 | -0.74461844 |
| S  | -6.14038720 | 0.50920954  | -4.26962420 |
| C  | -4.33773307 | 0.33347020  | -4.48172572 |
| H  | -4.09388686 | -0.72081253 | -4.64502317 |
| H  | -3.84253495 | 0.67972272  | -3.57195762 |
| C  | -3.86484000 | 1.18153900  | -5.67602000 |
| H  | -4.08818808 | 2.23959516  | -5.51494012 |
| H  | -2.77861915 | 1.08156956  | -5.77581328 |
| H  | -4.33224584 | 0.85717600  | -6.61091314 |
| C  | 2.14322497  | -1.18839695 | -1.25995867 |
| C  | 3.50898949  | -1.30794330 | -0.54807868 |
| H  | 3.39376771  | -1.83619475 | 0.40114401  |
| H  | 4.24812962  | -1.84452352 | -1.14678254 |

|   |             |             |             |
|---|-------------|-------------|-------------|
| H | 3.91510674  | -0.32175804 | -0.31856629 |
| C | 0.93850775  | -0.55156477 | -3.44373102 |
| H | 0.88586957  | 0.20331871  | -4.23602422 |
| H | 0.98304362  | -1.52964897 | -3.92954265 |
| H | 0.00602888  | -0.50396448 | -2.87268635 |
| C | 3.43682849  | -0.45496072 | -3.40006949 |
| H | 3.51890966  | -1.48739592 | -3.75787228 |
| H | 3.40097918  | 0.19672609  | -4.28053534 |
| H | 4.35094659  | -0.22038260 | -2.85032737 |
| C | -1.96620749 | 2.67791476  | 2.20495575  |
| H | -2.46975792 | 1.70821079  | 2.17544482  |
| H | -2.45119531 | 3.30044865  | 2.96658652  |
| H | -2.12231861 | 3.14314890  | 1.22957356  |
| C | 0.18536426  | 3.90969934  | 2.67806083  |
| H | -0.09449181 | 4.57818543  | 1.86427398  |
| H | -0.16179356 | 4.37771491  | 3.60589583  |
| H | 1.27717955  | 3.85563196  | 2.71455698  |
| C | -0.53366243 | -3.10941637 | 6.16899067  |
| H | -1.30663622 | -2.40631636 | 6.49641672  |
| H | -0.67921739 | -4.03584542 | 6.73494086  |
| H | 0.43969614  | -2.69199092 | 6.44084643  |
| C | -2.10972918 | -3.78242596 | 4.31948908  |
| H | -2.40664857 | -4.65008046 | 4.92057177  |
| H | -2.80095520 | -2.96187850 | 4.53881752  |
| H | -2.20592383 | -4.04282903 | 3.26118347  |
| C | 1.32496132  | -6.21767140 | 1.90798754  |
| H | 0.68655474  | -6.81407334 | 1.24873159  |
| H | 2.36081702  | -6.52461754 | 1.73996091  |
| H | 1.07378889  | -6.50181978 | 2.92824286  |
| C | 2.36261240  | -4.85359671 | -0.71362546 |
| C | 1.88642435  | -6.24837886 | -1.16520550 |
| H | 2.05841097  | -7.00169084 | -0.39783264 |
| H | 0.82491558  | -6.26085223 | -1.41766880 |
| H | 2.45288310  | -6.56768540 | -2.04485668 |
| C | 3.79924168  | -4.95629817 | -0.14562407 |
| H | 3.86507671  | -5.68522803 | 0.66648260  |
| H | 4.48073853  | -5.28475016 | -0.93956613 |
| H | 4.15504801  | -4.00142813 | 0.24907591  |
| C | 0.50043778  | 3.26419872  | -0.31371362 |
| H | 1.26782779  | 3.93847206  | 0.08282348  |
| H | 0.57830930  | 3.27823187  | -1.40038796 |
| H | -0.47575999 | 3.69479237  | -0.08741772 |
| H | -1.21054892 | 1.83087711  | 4.48968780  |
| C | 0.93513669  | 1.95193450  | 4.69213724  |
| H | 0.94236199  | 2.95924576  | 5.11721576  |
| H | 0.98895372  | 1.23627621  | 5.51935824  |
| H | 1.83829337  | 1.83665839  | 4.08054724  |
| C | 1.66751377  | -4.53960826 | 4.85542615  |
| H | 2.15928777  | -3.56087774 | 4.86836090  |
| H | 1.52996753  | -4.87228851 | 5.88911746  |
| H | 2.34625586  | -5.23846087 | 4.36002794  |
| H | -0.16740147 | -5.44027881 | 4.13349715  |
| H | 3.36848195  | -3.46314647 | -2.06122108 |
| C | 1.80935451  | -4.29815600 | -3.24644869 |
| H | 1.83279945  | -3.48641401 | -3.98102848 |
| H | 2.41692598  | -5.11292243 | -3.65097805 |
| H | 0.77656764  | -4.65042440 | -3.16770819 |
| C | 3.26012315  | 2.00417814  | -1.74544136 |
| H | 3.00897152  | 2.97253674  | -1.30660039 |
| H | 3.98712769  | 1.52245674  | -1.08788261 |
| H | 3.74803594  | 2.19192385  | -2.70652122 |

|   |             |             |             |
|---|-------------|-------------|-------------|
| H | 1.32337038  | 1.73093750  | -2.59225571 |
| H | -5.95778879 | -1.64479478 | -2.16856099 |
| C | 0.03876800  | -8.95446000 | -3.01758700 |
| C | -1.39856000 | -8.39895052 | -3.07407487 |
| C | -1.63484058 | -7.29929526 | -2.05896855 |
| C | -1.78413144 | -7.60491124 | -0.69767124 |
| C | -1.65491079 | -5.94718713 | -2.42276655 |
| C | -1.93126682 | -6.60899766 | 0.26367810  |
| C | -1.79616935 | -4.93229090 | -1.47444131 |
| C | -1.93053839 | -5.25962359 | -0.11679786 |
| O | -2.07081425 | -4.32437184 | 0.85082100  |
| C | -2.33227700 | 6.38456700  | -4.58263300 |
| C | -2.32853183 | 4.87955181  | -4.91375852 |
| C | -2.52146403 | 3.96620660  | -3.71583237 |
| C | -3.64644306 | 4.09323331  | -2.88470777 |
| C | -1.62335084 | 2.93274871  | -3.42436869 |
| C | -3.86982611 | 3.23392124  | -1.81442249 |
| C | -1.83295263 | 2.05583733  | -2.35703542 |
| C | -2.96328832 | 2.20024383  | -1.54122039 |
| O | -3.22851685 | 1.38559303  | -0.49293698 |
| H | -2.10683055 | -9.22043062 | -2.90213770 |
| H | -1.60338905 | -8.02072551 | -4.08326793 |
| H | -1.78205476 | -8.64738389 | -0.38428556 |
| H | -1.55576617 | -5.67654257 | -3.47254918 |
| H | -2.04935619 | -6.85151116 | 1.31583347  |
| H | -1.81816844 | -3.88721574 | -1.76945102 |
| H | -1.92921993 | -3.41845295 | 0.47199744  |
| H | 0.26355368  | -9.34986660 | -2.02093588 |
| H | -3.12105834 | 4.67822932  | -5.64925084 |
| H | -1.38607372 | 4.62176990  | -5.41282140 |
| H | -0.74289704 | 2.79648424  | -4.05098952 |
| H | -4.37797440 | 4.87120282  | -3.09016636 |
| H | -1.12804167 | 1.25993279  | -2.14130442 |
| H | -4.75296447 | 3.32673671  | -1.19021770 |
| H | -2.60554001 | 0.61458900  | -0.46473100 |
| H | -1.52786570 | 6.63175093  | -3.88137794 |
| H | 0.76801488  | -8.16561239 | -3.23025003 |
| H | 0.18383462  | -9.76111945 | -3.74528759 |
| H | -3.27730017 | 6.69178261  | -4.12329380 |
| H | -2.19233923 | 6.98302766  | -5.48915395 |
| C | 7.27033400  | -0.96865300 | 5.68501600  |
| C | 6.18970493  | -1.73503671 | 4.90722665  |
| C | 5.28557832  | -0.81397907 | 4.06910874  |
| C | 4.27260687  | -1.61060845 | 3.24392884  |
| O | 4.62108407  | -2.51394547 | 2.48717607  |
| N | 2.96607966  | -1.26487608 | 3.41059969  |
| H | 5.56535446  | -2.30710323 | 5.60668718  |
| H | 6.64479474  | -2.46635880 | 4.23074625  |
| H | 4.78539021  | -0.08050103 | 4.71492637  |
| H | 5.90194706  | -0.24829261 | 3.35809548  |
| H | 2.67333582  | -0.49065438 | 3.98445206  |
| H | 2.25190011  | -1.74008158 | 2.87140102  |
| H | 6.82553620  | -0.24879802 | 6.38238324  |
| H | 7.92501949  | -0.41078020 | 5.00492622  |
| H | 7.89742687  | -1.65303920 | 6.26596859  |

**React**<sub>modified F430-B12</sub>

|    |            |             |             |
|----|------------|-------------|-------------|
| Ni | 0.40161942 | -2.39331054 | 1.41507199  |
| N  | 1.34485455 | -1.31889288 | 0.02725795  |
| C  | 2.46432821 | -1.20783282 | -2.07023599 |

|   |             |             |             |
|---|-------------|-------------|-------------|
| C | 2.17483246  | 0.24328677  | -1.51182975 |
| C | 1.28884064  | -0.08909601 | -0.32010430 |
| N | -0.20152185 | -0.70302733 | 2.31179166  |
| C | 0.17325504  | 0.78562990  | 0.25509274  |
| C | -0.13454253 | 0.68724471  | 1.80931704  |
| C | 0.78465365  | 1.40861496  | 2.85240659  |
| C | 0.21009755  | 0.73012628  | 4.14623127  |
| C | -0.14413037 | -0.66015706 | 3.63129554  |
| N | 0.16157609  | -3.58708450 | 2.98236820  |
| C | -0.34446312 | -1.76687391 | 4.50500969  |
| C | -0.25486412 | -3.11160672 | 4.18495273  |
| C | -0.55882821 | -4.26220307 | 5.13921355  |
| C | 0.31707039  | -5.39505783 | 4.51836928  |
| C | 0.51602255  | -4.91740888 | 3.07143268  |
| N | 1.17773985  | -3.91059434 | 0.40876952  |
| C | 1.09905686  | -5.67338778 | 2.06570220  |
| C | 1.53189991  | -5.10797602 | 0.79198244  |
| C | 2.65284478  | -4.68342476 | -1.34057097 |
| C | 1.72022293  | -3.52890123 | -0.89815717 |
| H | -0.53967907 | -1.52186491 | 5.54282328  |
| H | 0.85949263  | -3.45852060 | -1.57223454 |
| C | -3.34554830 | -2.03763887 | 1.79996704  |
| H | -2.43961101 | -2.17345385 | 2.39363324  |
| H | -4.07676356 | -2.80658386 | 2.05924991  |
| H | -3.75839860 | -1.04412479 | 2.00151352  |
| S | -2.86478366 | -2.18767554 | 0.04369977  |
| C | -4.35116087 | -1.50568228 | -0.77580120 |
| H | -4.18973881 | -1.56797670 | -1.85351826 |
| H | -4.49577958 | -0.45621510 | -0.51099867 |
| H | -5.23413570 | -2.09660270 | -0.51966228 |
| S | -5.74117151 | 0.37616641  | -3.72639227 |
| C | -4.10003826 | 0.18152899  | -4.54748115 |
| H | -4.09452605 | -0.84657841 | -4.92417707 |
| H | -3.32317355 | 0.26053391  | -3.78152585 |
| C | -3.86455400 | 1.18191800  | -5.67637300 |
| H | -3.92689852 | 2.20684511  | -5.30485260 |
| H | -2.86679019 | 1.03916340  | -6.11177086 |
| H | -4.60808046 | 1.05712886  | -6.46955799 |
| C | 2.33357831  | -2.08725854 | -0.76500115 |
| C | 3.62023749  | -2.15477668 | 0.07682379  |
| H | 3.43826812  | -2.72441817 | 0.98576355  |
| H | 4.44275303  | -2.63503734 | -0.45561850 |
| H | 3.95011053  | -1.16010661 | 0.37954608  |
| C | 1.32872318  | -1.50958035 | -3.07393587 |
| H | 1.37907985  | -0.80045723 | -3.90809147 |
| H | 1.40047880  | -2.51452331 | -3.49572135 |
| H | 0.34321200  | -1.40386711 | -2.60735962 |
| C | 3.81163218  | -1.35140368 | -2.78634672 |
| H | 3.95732906  | -2.38534265 | -3.11802529 |
| H | 3.84641352  | -0.71183495 | -3.67575066 |
| H | 4.65951989  | -1.08456526 | -2.15190815 |
| O | -1.41657867 | 1.29413291  | 1.98464705  |
| H | -2.07389030 | 0.71446573  | 1.57928446  |
| C | 0.62959704  | 2.93351015  | 2.95160102  |
| H | -0.42201612 | 3.22512026  | 2.92232103  |
| H | 1.05632228  | 3.28031486  | 3.89961351  |
| H | 1.15924984  | 3.46289255  | 2.15634876  |
| C | 2.25931543  | 1.03600561  | 2.61669918  |
| H | 2.89325124  | 1.45778447  | 3.40315527  |
| H | 2.41001873  | -0.04648948 | 2.59003436  |
| H | 2.61473499  | 1.44638295  | 1.66632182  |

|   |             |             |             |
|---|-------------|-------------|-------------|
| C | -0.27665726 | -3.95272252 | 6.61374851  |
| H | -0.97910201 | -3.20072061 | 6.98818969  |
| H | -0.40589711 | -4.85047989 | 7.22771297  |
| H | 0.73657993  | -3.57323271 | 6.76899158  |
| C | -2.05578397 | -4.62390388 | 4.96923974  |
| H | -2.31235301 | -5.46718893 | 5.62160300  |
| H | -2.69218037 | -3.77487459 | 5.24115933  |
| H | -2.27583361 | -4.90704772 | 3.93660930  |
| C | 1.25720354  | -7.16666916 | 2.29679169  |
| H | 0.65904150  | -7.72931800 | 1.57205866  |
| H | 2.29149402  | -7.51566952 | 2.21788858  |
| H | 0.89900506  | -7.46186466 | 3.28189458  |
| C | 2.53989950  | -5.76407501 | -0.18525022 |
| C | 2.09008182  | -7.14106950 | -0.71071606 |
| H | 2.18707912  | -7.91331978 | 0.05104525  |
| H | 1.05096718  | -7.12665956 | -1.04305925 |
| H | 2.71618317  | -7.45308533 | -1.55139611 |
| C | 3.91361121  | -5.89405546 | 0.51491879  |
| H | 3.89155447  | -6.63992615 | 1.31333394  |
| H | 4.66790317  | -6.21440476 | -0.21437577 |
| H | 4.23813168  | -4.94951678 | 0.96131709  |
| C | 0.30031869  | 2.24980815  | -0.16096852 |
| H | 1.21609972  | 2.69476890  | 0.22731084  |
| H | 0.30943577  | 2.33705472  | -1.24845640 |
| H | -0.55366193 | 2.80852291  | 0.22260810  |
| O | -1.00369658 | 0.30370453  | -0.44969732 |
| H | -1.22387009 | -0.62301652 | -0.19290039 |
| H | -0.72030546 | 1.25601532  | 4.39508738  |
| C | 1.11984099  | 0.75107806  | 5.37670079  |
| H | 1.42480063  | 1.77508505  | 5.61742574  |
| H | 0.60487910  | 0.35021554  | 6.25470657  |
| H | 2.03009686  | 0.16122984  | 5.22822349  |
| C | 1.68481070  | -5.57915536 | 5.20541026  |
| H | 2.25099636  | -4.64234349 | 5.20030946  |
| H | 1.56791504  | -5.90795036 | 6.24293246  |
| H | 2.28630694  | -6.32476253 | 4.68019969  |
| H | -0.23233178 | -6.34103656 | 4.55538489  |
| H | 3.68799113  | -4.33258585 | -1.35589153 |
| C | 2.32641199  | -5.16619054 | -2.75850673 |
| H | 2.44575395  | -4.34483492 | -3.47250971 |
| H | 2.99272806  | -5.97030362 | -3.08418516 |
| H | 1.29613663  | -5.52776378 | -2.83435468 |
| C | 3.39037573  | 1.12754348  | -1.17240791 |
| H | 3.06586431  | 2.11108236  | -0.82244715 |
| H | 4.02353092  | 0.69099732  | -0.39719830 |
| H | 4.00793992  | 1.28495923  | -2.06174920 |
| H | 1.58344858  | 0.79358383  | -2.25417977 |
| H | -5.45163952 | 1.53919230  | -3.10516424 |
| C | 0.03880500  | -8.95451900 | -3.01748400 |
| C | -1.46470968 | -8.68520531 | -2.81564750 |
| C | -1.71447337 | -7.72299343 | -1.67450341 |
| C | -2.17711036 | -8.15817633 | -0.42757003 |
| C | -1.40615454 | -6.36255075 | -1.81629886 |
| C | -2.31492876 | -7.27780392 | 0.64638023  |
| C | -1.52305866 | -5.47257964 | -0.75354082 |
| C | -1.97453922 | -5.93307589 | 0.48997026  |
| O | -2.11734196 | -5.10643621 | 1.56786171  |
| C | -2.33178300 | 6.38467200  | -4.58248000 |
| C | -3.43771097 | 5.32928423  | -4.74955695 |
| C | -3.44290638 | 4.33363448  | -3.61044813 |
| C | -4.43666791 | 4.33001278  | -2.62494155 |

|   |             |             |             |
|---|-------------|-------------|-------------|
| C | -2.41087043 | 3.39292731  | -3.49618564 |
| C | -4.40225530 | 3.43496574  | -1.55449412 |
| C | -2.36777452 | 2.47969316  | -2.44884507 |
| C | -3.35909120 | 2.50796144  | -1.45469383 |
| O | -3.33947246 | 1.65438489  | -0.39928569 |
| H | -1.98436133 | -9.63204538 | -2.62489932 |
| H | -1.88599297 | -8.28094786 | -3.74585486 |
| H | -2.42656799 | -9.20797462 | -0.28752583 |
| H | -1.06026084 | -5.99319746 | -2.78009537 |
| H | -2.66898276 | -7.61884165 | 1.61465204  |
| H | -1.26999119 | -4.42566911 | -0.86957862 |
| H | -1.51945901 | -4.34557719 | 1.47878780  |
| H | 0.48455803  | -9.37233880 | -2.10899554 |
| H | -4.41405471 | 5.82356487  | -4.81755684 |
| H | -3.29155794 | 4.80069118  | -5.70153590 |
| H | -1.63405143 | 3.36039669  | -4.25772674 |
| H | -5.25524914 | 5.04350038  | -2.69106189 |
| H | -1.58192257 | 1.73453578  | -2.38965772 |
| H | -5.16800142 | 3.44510641  | -0.78483428 |
| H | -2.48457030 | 1.16521616  | -0.41648821 |
| H | -1.34509833 | 5.91202759  | -4.53092237 |
| H | 0.57432242  | -8.02908028 | -3.25254592 |
| H | 0.20899969  | -9.66122255 | -3.83803195 |
| H | -2.47473439 | 6.95171960  | -3.65634156 |
| H | -2.32458501 | 7.09277813  | -5.41899592 |
| C | 7.27036300  | -0.96856400 | 5.68488600  |
| C | 6.38457996  | -2.02611125 | 5.01243927  |
| C | 5.06609814  | -1.45878821 | 4.46514381  |
| C | 4.31487468  | -2.47947513 | 3.60717433  |
| O | 4.90430388  | -3.22297949 | 2.82529233  |
| N | 2.96140591  | -2.49543204 | 3.73897863  |
| H | 6.15620834  | -2.82919657 | 5.72518445  |
| H | 6.91487814  | -2.49855640 | 4.17938407  |
| H | 4.43174163  | -1.08319108 | 5.27870701  |
| H | 5.27692988  | -0.59985776 | 3.81170837  |
| H | 2.44987534  | -1.86767131 | 4.33987512  |
| H | 2.40402257  | -3.06172937 | 3.11072316  |
| H | 6.75579497  | -0.48656763 | 6.52470278  |
| H | 7.55284219  | -0.18202959 | 4.97498973  |
| H | 8.19224341  | -1.41555917 | 6.07168996  |

**Int1**<sub>Ni-methyl</sub>

|    |             |             |             |
|----|-------------|-------------|-------------|
| Ni | 1.73201139  | -0.97412469 | 1.17061738  |
| N  | 2.79840040  | -0.03119150 | -0.26877801 |
| C  | 3.62141423  | -0.06878986 | -2.50932299 |
| C  | 3.56441016  | 1.40519647  | -1.94275808 |
| C  | 2.81590298  | 1.19126634  | -0.63288244 |
| N  | 1.16023958  | 0.77278290  | 1.93889527  |
| C  | 1.92107649  | 2.26577657  | 0.03886169  |
| C  | 1.72190559  | 2.07626307  | 1.60185924  |
| C  | 0.76318881  | 3.10866023  | 2.35835301  |
| C  | 0.31242672  | 2.23680480  | 3.57693861  |
| C  | 0.41215643  | 0.82870311  | 3.01986786  |
| N  | 0.88220582  | -2.13157228 | 2.53155059  |
| C  | -0.15560949 | -0.27983482 | 3.70742480  |
| C  | 0.08018486  | -1.64070340 | 3.48646193  |
| C  | -0.52918126 | -2.76660170 | 4.32283259  |
| C  | 0.41384197  | -3.95537378 | 3.93908018  |
| C  | 1.00433505  | -3.50318401 | 2.60075625  |
| N  | 2.32008197  | -2.56592761 | 0.16993968  |

|   |             |             |             |
|---|-------------|-------------|-------------|
| C | 1.61167917  | -4.32668724 | 1.66789205  |
| C | 2.18449165  | -3.83406398 | 0.41739169  |
| C | 3.36437235  | -3.59911424 | -1.66804110 |
| C | 2.73116589  | -2.27462092 | -1.20743640 |
| H | -0.80833281 | -0.02766536 | 4.53574950  |
| H | 1.81045218  | -2.09592492 | -1.77395623 |
| C | -0.11470921 | -1.18212919 | 0.13208808  |
| H | -0.76629331 | -0.63559663 | 0.80182211  |
| H | -0.24934885 | -2.25514176 | 0.13104893  |
| H | 0.06032227  | -0.72208914 | -0.83500472 |
| S | -2.86830716 | -1.58190403 | -0.89839140 |
| C | -3.75985352 | -1.12603182 | 0.65373647  |
| H | -3.46181218 | -1.77795012 | 1.48045232  |
| H | -4.83913838 | -1.22692348 | 0.50676435  |
| H | -3.54066885 | -0.08889281 | 0.92457530  |
| S | -4.90417089 | -1.06545169 | -4.39873495 |
| C | -3.47353189 | 0.06466371  | -4.71018131 |
| H | -2.64025409 | -0.52008787 | -5.11380837 |
| H | -3.16217634 | 0.47957067  | -3.75062623 |
| C | -3.86455400 | 1.18191800  | -5.67637300 |
| H | -4.63801546 | 1.82092245  | -5.23995990 |
| H | -2.99462764 | 1.80806603  | -5.89925547 |
| H | -4.24519151 | 0.78076861  | -6.62296606 |
| C | 3.55448264  | -0.93290570 | -1.18453857 |
| C | 4.92674568  | -1.19743364 | -0.53978887 |
| H | 4.78394424  | -1.69577595 | 0.41975374  |
| H | 5.55310567  | -1.81785673 | -1.18540864 |
| H | 5.45465940  | -0.26311362 | -0.34461473 |
| C | 2.35554346  | -0.25921666 | -3.37209840 |
| H | 2.37662859  | 0.43817387  | -4.21690974 |
| H | 2.28441658  | -1.26959236 | -3.78279665 |
| H | 1.44505028  | -0.05425449 | -2.79930007 |
| C | 4.85536267  | -0.33316217 | -3.38048965 |
| H | 4.85091050  | -1.35850470 | -3.75959165 |
| H | 4.85654898  | 0.33400468  | -4.24978080 |
| H | 5.79533900  | -0.18359759 | -2.84585515 |
| O | 3.03493073  | 2.08170397  | 2.19813485  |
| H | 3.43472585  | 2.94482012  | 2.03307980  |
| C | -0.51462896 | 3.46361405  | 1.56603984  |
| H | -1.10174592 | 2.57795504  | 1.31312564  |
| H | -1.14036529 | 4.11383609  | 2.18883709  |
| H | -0.30955107 | 3.98609298  | 0.63157208  |
| C | 1.44981331  | 4.40999622  | 2.80668392  |
| H | 1.65946980  | 5.07670490  | 1.96736442  |
| H | 0.78709897  | 4.95791681  | 3.48541873  |
| H | 2.38414696  | 4.23145979  | 3.34525418  |
| C | -0.58473439 | -2.44770300 | 5.82358934  |
| H | -1.30980055 | -1.65171912 | 6.02045002  |
| H | -0.90974700 | -3.32767143 | 6.38907910  |
| H | 0.38325830  | -2.12568686 | 6.21843151  |
| C | -1.95750417 | -3.04809739 | 3.80177446  |
| H | -2.41677999 | -3.85144193 | 4.39032024  |
| H | -2.58598941 | -2.15619392 | 3.89646515  |
| H | -1.94618401 | -3.35871766 | 2.75418426  |
| C | 1.66970780  | -5.81924591 | 1.93399485  |
| H | 1.24774572  | -6.39601880 | 1.10784685  |
| H | 2.69817738  | -6.16518220 | 2.09151303  |
| H | 1.09970284  | -6.09684899 | 2.81984382  |
| C | 2.58651187  | -4.67405329 | -0.82135373 |
| C | 1.29526617  | -5.13923001 | -1.52713785 |
| H | 0.70124616  | -5.78959082 | -0.88426742 |



|   |             |             |             |
|---|-------------|-------------|-------------|
| H | 0.65575433  | -4.29688600 | -1.80751006 |
| H | 1.53245448  | -5.70354588 | -2.43448200 |
| C | 3.51642946  | -5.87338899 | -0.56459176 |
| H | 2.98624476  | -6.74781882 | -0.18474815 |
| H | 3.98858792  | -6.17073452 | -1.50833565 |
| H | 4.31493658  | -5.61794358 | 0.14073959  |
| C | 2.45024910  | 3.67596679  | -0.26387015 |
| H | 3.41400510  | 3.88384410  | 0.20958979  |
| H | 2.56508206  | 3.80082237  | -1.34140186 |
| H | 1.72283803  | 4.41594317  | 0.06202950  |
| O | 0.72079871  | 2.18744846  | -0.70625401 |
| H | 0.07845163  | 1.54726582  | -0.34495410 |
| H | -0.72655636 | 2.46918772  | 3.83899891  |
| C | 1.16610627  | 2.35683456  | 4.85548290  |
| H | 1.08666750  | 3.35561515  | 5.29485008  |
| H | 0.82258059  | 1.63557587  | 5.60462432  |
| H | 2.21596899  | 2.15349425  | 4.63059346  |
| C | 1.56712915  | -4.19904763 | 4.93340706  |
| H | 2.17195102  | -3.29288459 | 5.05045127  |
| H | 1.19326565  | -4.49542538 | 5.91825689  |
| H | 2.22592308  | -4.99198679 | 4.56898727  |
| H | -0.17575409 | -4.87076363 | 3.83840080  |
| H | 4.40057686  | -3.62352777 | -1.31049082 |
| C | 3.36165388  | -3.85035246 | -3.17486682 |
| H | 4.03508107  | -3.16248912 | -3.69227585 |
| H | 3.69821347  | -4.86652320 | -3.40693355 |
| H | 2.36335189  | -3.72568381 | -3.60466841 |
| C | 4.91865573  | 2.12418658  | -1.77192122 |
| H | 4.78289095  | 3.14287171  | -1.40485407 |
| H | 5.57766747  | 1.60579727  | -1.07167391 |
| H | 5.43633174  | 2.19349862  | -2.73270336 |
| H | 2.94757425  | 2.01991683  | -2.60951715 |
| H | -4.48461942 | -1.48751450 | -3.18192542 |
| C | 0.03880500  | -8.95451900 | -3.01748400 |
| C | -1.29406589 | -9.00507187 | -2.24316737 |
| C | -1.56518582 | -7.73570265 | -1.46036630 |
| C | -1.32786754 | -7.65147280 | -0.08208832 |
| C | -2.02624350 | -6.57993075 | -2.10701682 |
| C | -1.51568449 | -6.46035627 | 0.62001357  |
| C | -2.21740809 | -5.38057870 | -1.42511248 |
| C | -1.93752526 | -5.30587908 | -0.05114918 |
| O | -2.04440590 | -4.15554245 | 0.65488077  |
| C | -2.33178300 | 6.38467200  | -4.58248000 |
| C | -2.99557256 | 5.00834990  | -4.76940764 |
| C | -2.67834025 | 4.03399696  | -3.65286880 |
| C | -3.38657699 | 4.06227861  | -2.44463440 |
| C | -1.66545529 | 3.07649645  | -3.79350397 |
| C | -3.11481951 | 3.15242363  | -1.42194627 |
| C | -1.38797410 | 2.15946102  | -2.78246468 |
| C | -2.12219802 | 2.18703392  | -1.59291533 |
| O | -1.84933241 | 1.30273813  | -0.57204102 |
| H | -1.28607111 | -9.86538667 | -1.56212805 |
| H | -2.11188549 | -9.18180426 | -2.95434642 |
| H | -0.98690704 | -8.53475778 | 0.45539078  |
| H | -2.23914597 | -6.61656874 | -3.17403527 |
| H | -1.32331332 | -6.40034074 | 1.68696425  |
| H | -2.57573852 | -4.49469816 | -1.94101850 |
| H | -2.30619691 | -3.39943979 | 0.06104503  |
| H | 0.88068691  | -8.81378653 | -2.32984934 |
| H | -4.08305888 | 5.13935345  | -4.83896534 |
| H | -2.67707269 | 4.57856907  | -5.72718582 |

|   |             |             |             |
|---|-------------|-------------|-------------|
| H | -1.09362108 | 3.03693275  | -4.71864538 |
| H | -4.17908958 | 4.79569297  | -2.30858187 |
| H | -0.60068689 | 1.42231085  | -2.89833643 |
| H | -3.67706879 | 3.16151777  | -0.49292074 |
| H | -2.09003813 | 0.36648100  | -0.84318310 |
| H | -1.24132718 | 6.28805630  | -4.53647590 |
| H | 0.04368994  | -8.11469256 | -3.72065794 |
| H | 0.20885200  | -9.87690777 | -3.58487329 |
| H | -2.66133249 | 6.85139726  | -3.64762656 |
| H | -2.58072876 | 7.06172990  | -5.40759917 |
| C | 7.27036300  | -0.96856400 | 5.68488600  |
| C | 5.80256381  | -1.19870312 | 5.30669637  |
| C | 5.40935947  | -0.47036863 | 4.00798598  |
| C | 3.97294119  | -0.70019078 | 3.55683176  |
| O | 3.71236995  | -1.03382221 | 2.39724771  |
| N | 3.02030241  | -0.53438341 | 4.50525626  |
| H | 5.16465199  | -0.86728072 | 6.13660004  |
| H | 5.60986365  | -2.27223814 | 5.18658282  |
| H | 5.54812202  | 0.61374227  | 4.12956099  |
| H | 6.05116677  | -0.78596150 | 3.18081661  |
| H | 3.25008055  | -0.11126258 | 5.39006538  |
| H | 2.04310696  | -0.54117308 | 4.23763443  |
| H | 7.47731006  | 0.09748965  | 5.83580350  |
| H | 7.94150141  | -1.32826708 | 4.89667174  |
| H | 7.52821002  | -1.49457145 | 6.60985782  |

## References cited in ESI:

- S1 (a) C. Lee, W. Yang, R. G. Parr, *Phys. Rev. B* **1988**, 37, 785–789; (b) A. D. Becke, *J. Chem. Phys.* **1993**, 98, 1372–1377; (c) A. D. Becke, *J. Chem. Phys.* **1993**, 98, 5648–5652.
- S2 (a) S. Grimme, *J. Comput. Chem.* **2004**, 25, 1463–1473; (b) S. Grimme, *J. Comput. Chem.* **2006**, 27, 1787–1799; (c) S. Grimme, J. Antony, S. Ehrlich, H. Krieg, *J. Chem. Phys.* **2010**, 132, 154104; (d) L. Goerigk, S. Grimme, *Phys. Chem. Chem. Phys.* **2011**, 13, 6670–6688.
- S3 Jaguar, version 8.7, Schrodinger, LLC, New York, NY, **2015**.
- S4 M. J. Frisch, G. W. Trucks, H. B. Schlegel, G. E. Scuseria, M. A. Robb, J. R. Cheeseman, G. Scalmani, V. Barone, B. Mennucci, G. A. Petersson, H. Nakatsuji, M. Caricato, X. Li, H. P. Hratchian, A. F. Izmaylov, J. Bloino, G. Zheng, J. L. Sonnenberg, M. Hada, M. Ehara, K. Toyota, R. Fukuda, J. Hasegawa, M. Ishida, T. Nakajima, Y. Honda, O. Kitao, H. Nakai, T. Vreven, J. A. Montgomery Jr., J. E. Peralta, F. Ogliaro, M. Bearpark, J. J. Heyd, E. Brothers, K. N. Kudin, V. N. Staroverov, T. Keith, R. Kobayashi, J. Normand, K. Raghavachari, A. Rendell, J. C. Burant, S. S. Iyengar, J. Tomasi, M. Cossi, N. Rega, J. M. Millam, M. Klene, J. E. Knox, J. B. Cross, V. Bakken, C. Adamo, J. Jaramillo, R. Gomperts, R. E. Stratmann, O. Yazyev, A. J. Austin, R. Cammi, C. Pomelli, J. W. Ochterski, R. L. Martin, K. Morokuma, V. G. Zakrzewski, G. A. Voth, P. Salvador, J. J. Dannenberg, S. Dapprich, A. D. Daniels, O. Farkas, J. B. Foresman, J. V. Ortiz, J. Cioslowski, D. J. Fox, Gaussian 09, Revision D.01, Gaussian, Inc., Wallingford CT, **2013**.
- S5 (a) P. E. M. Siegbahn, *J. Comput. Chem.* **2001**, 22, 1634–1645; (b) P. E. M. Siegbahn, *Q. Rev. Biophys.* **2003**, 36, 91–145; (c) F. Himo, P. E. M. Siegbahn, *Chem. Rev.* **2003**, 103, 2421–2456; (d) F. Himo, *Theor. Chem. Acc.* **2006**, 116, 232–240; (e) F. Himo, P. E. M. Siegbahn, *J. Biol. Inorg. Chem.* **2009**, 14, 643–651; (f) P. E. M. Siegbahn, M. R. A. Blomberg, *Chem. Rev.* **2010**, 110, 7040–7061.
- S6 (a) P. E. M. Siegbahn, S. L. Chen, R. Z. Liao, *Inorganics* **2019**, 7, 95; (b) T. H. Zhang, X. Y. Zhang and L. W. Chung, *Asian J. Org. Chem.* **2018**, 7, 522–536.
- S7 (a) V. Pelmenchikov, M. R. A. Blomberg, P. E. M. Siegbahn and R. H. Crabtree, *J. Am. Chem. Soc.* **2002**, 124, 4039–4049; (b) S. L. Chen, V. Pelmenchikov, M. R. A. Blomberg and P. E. M. Siegbahn, *J. Am. Chem. Soc.* **2009**, 131, 9912–9913; (c) S. L. Chen, M. R. A. Blomberg, P. E. M. Siegbahn, *Chem. Eur. J.* **2012**, 18, 6309–6315; (d) S. L. Chen, M. R. A. Blomberg, P. E. M. Siegbahn, *Phys. Chem. Chem. Phys.* **2014**, 16, 14029–14035.
- S8 (a) X. Zhang, L. W. Chung, *Chem. Eur. J.* **2017**, 23, 3623–3630; (b) M. J. Yu, S. L. Chen, *Chem. Eur. J.* **2017**, 23, 7545–7557.
- S9 W. Grabarse, F. Mahlert, E. C. Duin, M. Goubeaud, S. Shima, R. K. Thauer, V. Lamzin and U. Ermler, *J. Mol. Biol.* **2001**, 309, 315–330.
- S10 J. Wang, R. M. Wolf, J. W. Caldwell, P. A. Kollman and D. A. Case, *J. Comput. Chem.* **2004**, 25, 1157–1174.
- S11 P. F. Li, K. M. Merz, *J. Chem. Inf. Model.* **2016**, 56, 599–604.
- S12 J. A. Maier, C. Martinez, K. Kasavajhala, L. Wickstrom, K. E. Hauser and C. Simmerling, *J. Chem. Theory Comput.* **2015**, 11, 3696–3713.
- S13 W. L. Jorgensen, J. Chandrasekhar, J. D. Madura, R. W. Impey and M. L. Klein, *J. Chem. Phys.* **1983**, 79, 926–935.
- S14 (a) A. W. Götz, M. J. Williamson, D. Xu, D. Poole, S. L. Grand and R. C. Walker, *J. Chem. Theory Comput.* **2012**, 8, 1542–1555; (b) S. L. Grand, A. W. Götz, R. C. Walker, *Comput. Phys. Commun.* **2013**, 184, 374–380.
- S15 D. A. Case, T. A. Darden, T. E. Cheatham, C. L. Simmerling, J. Wang, R. E. Duke, R. Luo, M. Crowley, R. C. Walker, W. Zhang, K. M. Merz, B. Wang, S. Hayik, A. Roitberg, G. Seabra, I. Kolossváry, K. F. Wong, F. Paesani, J. Vanicek, X. Wu, S. R. Brozell, T. Steinbrecher, H. Gohlke, L. Yang, C. Tan, J. Mongan, V. Hornak, G. Cui, D. H. Mathews, M. G. Seetin, C. Sagui, V. Babin, P. A. Kollman, *AMBER 16*, University of California, San Francisco, **2016**.
- S16 T. Darden, D. York, L. Pedersen, *J. Chem. Phys.* **1993**, 98, 10089–10092.
- S17 J.-P. Ryckaert, G. Ciccotti, H. J. C. Berendsen, *J. Comput. Phys.* **1977**, 23, 327–341.
- S18 J. A. Izaguirre, D. P. Catarello, J. M. Wozniak and R. D. Skeel, *J. Chem. Phys.* **2001**, 114, 2090–2098.
- S19 H. J. C. Berendsen, J. P. M. Postma, W. F. van Gunsteren, A. DiNola and J. R. Haak, *J. Chem. Phys.* **1984**, 81, 3684–3690.
- S20 D. R. Roe, T. E. Cheatham, *J. Chem. Theory Comput.* **2013**, 9, 3084–3095.

## The complete references 2, 3, 5, 6, 8, 9, 12, 15, 18, 20-23, and 26-28 in the text:

- 2 (a) P. N. Evans, J. A. Boyd, A. O. Leu, B. J. Woodcroft, D. H. Parks, P. Hugenholtz and G. W. Tyson, *Nature Rev. Microbiol.* **2019**, *17*, 219-232; (b) R. K. Thauer, A. K. Kaster, H. Seedorf, W. Buckel and R. Hedderich, *Nature Rev. Microbiol.* **2008**, *6*, 579-591.
- 3 K. Nauhaus, M. Albrecht, M. Elvert, A. Boetius and F. Widdel, *Environ. Microbiol.* **2007**, *9*, 187-196.
- 5 K. F. Ettwig, B. Zhu, D. Speth, J. T. Keltjens, M. S. M. Jetten and B. Kartal, *Proc. Natl Acad. Sci. USA* **2016**, *113*, 12792-12796.
- 6 M. F. Haroon, S. Hu, Y. Shi, M. Imelfort, J. Keller, P. Hugenholtz, Z. Yuan and G. W. Tyson, *Nature* **2013**, *500*, 567-570.
- 8 B. Shen, L. Dong, S. H. Xiao, X. G. Lang, K. J. Huang, Y. B. Peng, C. M. Zhou, S. Ke and P. J. Liu, *Nature Comm.* **2016**, *7*, 10317.
- 9 N. J. Planavsky, C. T. Reinhard, X. Wang, D. Thomson, P. McGoldrick, R. H. Rainbird, T. Johnson, W. W. Fischer and T. W. Lyons, *Science* **2014**, *346*, 635-638.
- 12 (a) K. D. Nguyen, B. Y. Park, T. Luong, H. Sato, V. J. Garza and M. J. Krische, *Science* **2016**, *354*, 300; (b) S. J. Moore, S. T. Sowa, C. Schuchardt, E. Deery, A. D. Lawrence, J. V. Ramos, S. Billig, C. Birkemeyer, P. T. Chivers, M. J. Howard, S. E. Rigby, G. Layer and M. J. Warren, *Nature* **2017**, *543*, 78-82.
- 15 (a) A. Sluijs, H. Brinkhuis, S. Schouten, S. M. Bohaty, C. M. John, J. C. Zachos, G. J. Reichart, J. S. S. Damsté, E. M. Crouch and G. R. Dickens, *Nature* **2007**, *450*, 1218-1221.
- 18 C. Kieninger, E. Deery, A. D. Lawrence, M. Podewitz, K. Wurst, E. Nemoto-Smith, F. J. Widner, J. A. Baker, S. Jockusch, C. R. Kreutz, K. R. Liedl, K. Gruber, M. J. Warren, B. Kräutler, *Angew. Chem. Int. Ed.* **2019**, *58*, 10756 – 10760.
- 20 (a) V. Pelmentschikov, M. R. A. Blomberg, P. E. M. Siegbahn and R. H. Crabtree, *J. Am. Chem. Soc.* **2002**, *124*, 4039-4049; (b) S. L. Chen, V. Pelmentschikov, M. R. A. Blomberg and P. E. M. Siegbahn, *J. Am. Chem. Soc.* **2009**, *131*, 9912 –9913; (c) S. L. Chen, M. R. A. Blomberg and P. E. M. Siegbahn, *Chem. Eur. J.* **2012**, *18*, 6309-6315.
- 21 (a) T. Wongnate, D. Sliwa, B. Ginovska, D. Smith, M. W. Wolf, N. Lehnert, S. Rauegi and S. W. Ragsdale, *Science* **2016**, *352*, 953–958; (b) T. J. Lawton, A. C. Rosenzweig, *Science* **2016**, *352*, 892-893; (c) S. Shima, *Angew. Chem. Int. Ed.* **2016**, *55*, 13648-13649.
- 22 S. Scheller, M. Goenrich, R. K. Thauer and B. Jaun, *J. Am. Chem. Soc.* **2013**, *135*, 14975–14984.
- 23 W. Grabarse, F. Mahler, E. C. Duin, M. Goubeaud, S. Shima, R. K. Thauer, V. Lamzin and U. Ermler, *J. Mol. Biol.* **2001**, *309*, 315–330.
- 26 D. A. Case, T. A. Darden, T. E. Cheatham, C. L. Simmerling, J. Wang, R. E. Duke, R. Luo, M. Crowley, R. C. Walker, W. Zhang, K. M. Merz, B. Wang, S. Hayik, A. Roitberg, G. Seabra, I. Kolossváry, K. F. Wong, F. Paesani, J. Vanicek, X. Wu, S. R. Brozell, T. Steinbrecher, H. Gohlke, L. Yang, C. Tan, J. Mongan, V. Hornak, G. Cui, D. H. Mathews, M. G. Seetin, C. Sagui, V. Babin, P. A. Kollman, *AMBER 16*, University of California, San Francisco, **2016**.
- 27 S. C. Chen, N. Musat, O. J. Lechtenfeld, H. Paschke, M. Schmidt, N. Said, D. Popp, F. Calabrese, H. Stryhanyuk, U. Jaekel, Y. G. Zhu, S. B. Joye, H. H. Richnow, F. Widdel and F. Musat, *Nature* **2019**, *568*, 108-111.
- 28 R. L. Pérez, G. Wegener, K. Knittel, F. Widdel, K. J. Harding, V. Krukenberg, D. V. Meier, M. Richter, H. E. Tegetmeyer, D. Riedel, H. H. Richnow, L. Adrian, T. Reemtsma, O. J. Lechtenfeld and F. Musat, *Nature* **2016**, *539*, 396-401.
